# Supplementary material for: Influence of imidazole functionalization on the properties of small molecule models of the LPMO active site
Source: Royal Society of Chemistry journal article supplement (doi:10.1039/d4dt03424d), 2025-01-01
Supplement: d4dt03424d1.pdf [file d4dt03424d1.pdf]

## Table of Contents

|                                                                 |    |
|-----------------------------------------------------------------|----|
| Experimental part .....                                         | 2  |
| 1) General informations .....                                   | 2  |
| 2) Synthetic methods.....                                       | 3  |
| 3) X-ray diffraction crystallography .....                      | 15 |
| 4) EPR spectroscopy .....                                       | 31 |
| 5) UV-visible spectra .....                                     | 35 |
| 6) Cyclic voltammetry .....                                     | 42 |
| 7) Reactivity test of catalytic oxidation cleavage of PNPG..... | 47 |
| 8) Computational Studies.....                                   | 52 |
| 9) NMR spectra.....                                             | 62 |
| 10) References .....                                            | 71 |

## Experimental part

### 1) General information

All commercial reagents and solvents were used as purchased without further purification unless otherwise stated.

Dry solvents were obtained by standard procedures according to D. D. Perrin and D. R. Perrin, Purification of Laboratory Chemicals. Tetrahydrofuran and diethylether were purified by distillation from benzophenone ketyl radical. Dichloromethane, toluene, trimethylamine and trimethylsilyl chloride were purified by distillation from calcium hydride. Technical grade ethyl acetate and petroleum ether (40 to 65 °C fraction) were evaporated under reduced pressure.

Analytical thin layer chromatography (TLC) was carried out on Merck Millipore F254 silica gel 60 plates (210-270 µm thickness, aluminium supported). The plates were visualized using ultra-violet light (254 nm).

Flash column chromatography was carried out on ROCC silica gel 60Å (230-400 Mesh).

Proton nuclear magnetic resonance ( $^1\text{H}$  NMR) spectra were recorded using Bruker Avance II-300 (300 MHz) spectrometers. Carbon nuclear magnetic resonance ( $^{13}\text{C}$  NMR) spectra were recorded using Bruker Avance II-300 (75 MHz) spectrometers. Chemical shifts ( $\delta$ ) are reported in parts per million (ppm) relative to residual solvent peaks:  $^1\text{H}$  ( $\text{CDCl}_3$   $\delta_{\text{ppm}} = 7.26$ ,  $d_6$ -DMSO  $\delta_{\text{ppm}} = 2.50$ ,  $\text{D}_2\text{O}$   $\delta_{\text{ppm}} = 4.79$ ,  $^{13}\text{C}$  ( $d_6$ -DMSO  $\delta_{\text{ppm}} = 39.5$ ). Coupling constants are reported in Hertz (Hz). Splitting patterns are designed as: s (singlet), d (doublet), t (triplet), q (quartet), and m (multiplet).

Mass spectra were recorded by the Mass Spectrometry Service of the “asm” platform from the Institute of Condensed Matter and Nanosciences (IMCN) at UCLouvain, using Q-ToF Waters Synapt XS spectrometers with a Thermo Orbitrap Exactive device. The values are given in Dalton..

All diffraction data were recorded on a MAR345 image plate using Mo-K $\alpha$  radiation generated by an Incoatec I $\mu$ S microfocus source (Montel Mirrors). All crystals were stable and measured at ambient conditions. Data integration and reduction was carried out using the CrysAlis<sup>PRO</sup> software package, and the implemented absorption correction was applied. The structures were solved by dual space direct methods (SHELXT) and refined against  $F^2$  by SHELXL-2018/3 or 2019/3. All non-hydrogen bonds were refined anisotropically, hydrogen atoms were added in

calculated positions and refined in riding mode, with temperature factors 1.2 times higher than their parent atoms (1.5 for methyl hydrogens).

UV/Visible experiments were performed on a VWR UV-1600PC Scanning Spectrophotometer equipped with Deuterium/Tungsten Halogen Lamp.

CW-EPR spectra were recorded at 100 K (frozen solutions), on a Bruker Magnettech ESR5000 EPR spectrometer operating at ~9.5 GHz (X-band). Unless otherwise stated, 10–3 M solutions of copper complexes were prepared in methanol. Samples were contained in 3 mm OD quartz tubes closed with PE caps. The EPR spectra were obtained with the following spectrometer settings: microwave power: 20 mW; modulation amplitude: 0.7 mT and modulation frequency: 100 kHz. The number of scans was 4. Data handling was performed on the Bruker ESR Studio version 1.90.0 software. All spectra are shown after baseline correction. The Spin Count software module (Bruker) was used for quantitative measurements. Results of the quantification were confirmed using a copper disodium ethylenediaminetetraacetate solution (Cu(II)EDTA(Na)<sub>2</sub>) and acquisition of a spectrum in the same conditions before and after the spectra of the samples. The simulations of CW EPR spectra were run with Easyspin 6.0.61 using the ‘pepper’ function with one electron spin  $S=1/2$  (Cu unpaired electron). All parameters were optimized using ‘esfit’ function.

Elemental Analysis (CHNS) was done with Thermo<sup>TM</sup> FlashSmart<sup>TM</sup> Elemental Analyzer.

Only crystalline material of the copper coomplexes was used for all the analysis and reactivity studies.

## 2) Synthetic methods

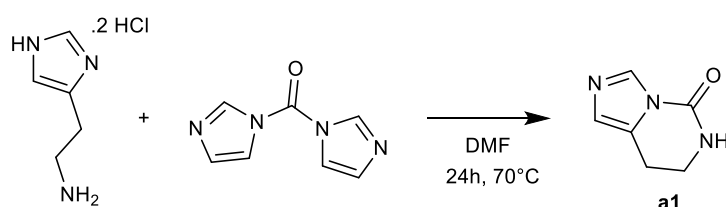

**Scheme S1:** Synthesis of **a1**. Adapted from<sup>2</sup>

A solution of histamine dihydrochloride (3.002 g, 16.3 mmol, 1 eq.) and carbonyldiimidazole (2.683 g, 16.5 mmol, 1 eq.) in DMF (15 ml) was stirred at 70°C for 24h. The solvent was then removed under vacuum. The oily product was redissolved in a saturated solution of NaHSO<sub>4</sub>

(50 mL) and, the solution was extracted with DCM (10 x 60 mL). The organic layers were combined, dried over Na<sub>2</sub>SO<sub>4</sub> and evaporated under vacuum. The crude was resuspended in acetonitrile (4 mL), filtered and dried to afford the product **a1** as a white powder (1.162 g, 50%).

**<sup>1</sup>H NMR (300 MHz, *d*<sub>6</sub>-DMSO) δ (ppm):** 8.20 (s, 1H), 8.05 (d, *J* = 0.9 Hz, 1H), 6.80 (m, 1H), 3.40 – 3.33 (m, 2H), 2.88 (td, *J* = 6.5, 1.2 Hz, 2H).

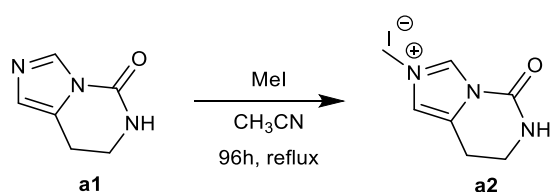

**Scheme S2:** Synthesis of **a2**. Adapted from<sup>3</sup>

Iodomethane (7 mL, 112.4 mmol, 3 eq.) was added to a suspension of **a1** (5 g, 36.9 mmol, 1 eq.) in acetonitrile (200 mL) and the reaction mixture was refluxed for 4 days covered from light. The solvent was then removed under vacuum and the orange powder was suspended in acetone, filtered and dried under vacuum to afford the product **a2** as a beige shiny powder (9.979 g, 97%).

**<sup>1</sup>H NMR (300 MHz, *d*<sub>6</sub>-DMSO) δ (ppm):** 9.67 (dd, *J* = 1.4, 0.8 Hz, 1H), 9.01 (s, 1H), 7.61 (d, *J* = 1.3 Hz, 1H), 3.90 (s, 3H), 3.47 (td, *J* = 6.5, 2.8 Hz, 2H), 3.03 (dd, *J* = 9.5, 3.6 Hz, 2H).

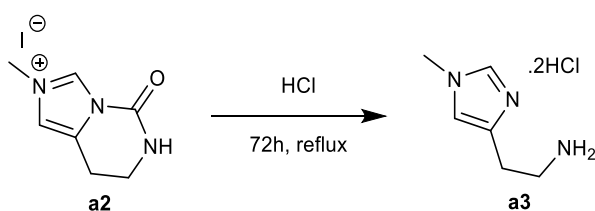

**Scheme S3:** Synthesis of **a3**. Adapted from<sup>3</sup>

A suspension of **a2** (2,008 g, 7.17 mmol, 1 eq.) in HCl 6 M (30 mL) was refluxed for 3 days covered from light. The solvent was then removed under vacuum, and residual iodine impurities were removed by azeotroping with toluene several times. The crude was stirred overnight in acetonitrile then filtered to afford the methylated histamine **a3** as a white powder (1.235 g, 87%).

**<sup>1</sup>H NMR (300 MHz, *d*<sub>6</sub>-DMSO)** δ (ppm): 9.08 (d, *J* = 0.8 Hz, 1H), 8.41 (s, 3H), 7.56 (d, *J* = 0.9 Hz, 1H), 3.81 (s, 3H), 3.20 – 3.07 (m, 2H), 3.03 (t, *J* = 6.6 Hz, 2H).

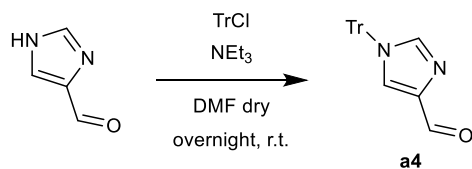

**Scheme S4:** Synthesis of **a4**. Adapted from<sup>4</sup>

To a solution of 1*H*-imidazole-4-carbaldehyde (5 g, 52.07 mmol, 1 eq.) and dry triethylamine (10.5 g, 14.5 mL, 104.13 mmol, 2 eq.) in dry DMF (60 mL) under argon was added drop by drop a 80 mL solution of trityl chloride (14.5 g, 52.07 mmol, 1 eq.) in dry DMF. The resulting solution was stirred at room temperature overnight. Water (250 mL) was then added, the resulting precipitate was filtered washed with water and ether and dried under vacuum to afford the product **a4** as a fluffy pale pink powder (15.6 g, **89%**).

**<sup>1</sup>H NMR (300 MHz, DMSO)** δ 9.72 (s, 1H), 7.80 (d, *J* = 1.3 Hz, 1H), 7.67 (d, *J* = 1.0 Hz, 1H), 7.51 – 7.37 (m, 9H), 7.16 – 7.05 (m, 6H).

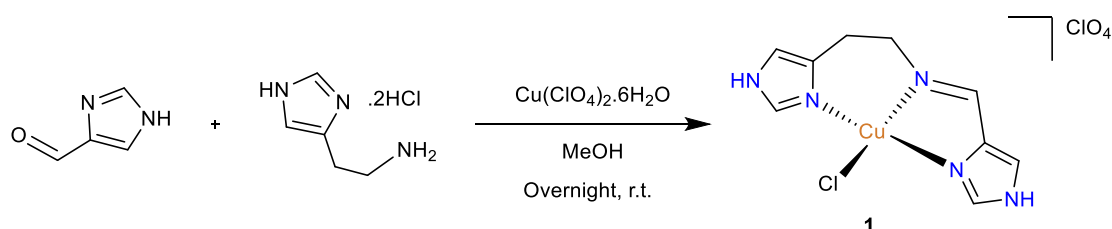

**Scheme S5:** Synthesis of **1**. Adapted from<sup>5</sup>

1*H*-imidazole-4-carbaldehyde (0.097 g, 1.1 mmol, 1 eq.), histamine dihydrochloride (0.186 g, 1.1 mmol, 1 eq.) and copper perchlorate hexahydrate (0.374 g, 1.1 mmol, 1 eq.) were dissolved in MeOH (6 mL). The mixture was stirred at room temperature overnight. The resulting suspension was cooled down to 0°C and filtered. The solid was collected, triturated in diethyl ether, filtered and dried under vacuum. Slow diffusion of ether in a methanol solution of the complex yielded the pure compound **1** as deep blue crystals (0.141 g, **33%**).

**HRMS (ESI)** *m/z* calculated for C<sub>9</sub>H<sub>11</sub>ClCuN<sub>5</sub> [*M* + Cl]<sup>+</sup> 286.99990, found 286.99924

**Elemental analysis:** Calculated for  $C_9H_{11}N_5Cl_2CuO_4$ , C, 27.88; H, 2.86; N, 18.07. Found C, 27.96; H, 2.84; N, 18.02

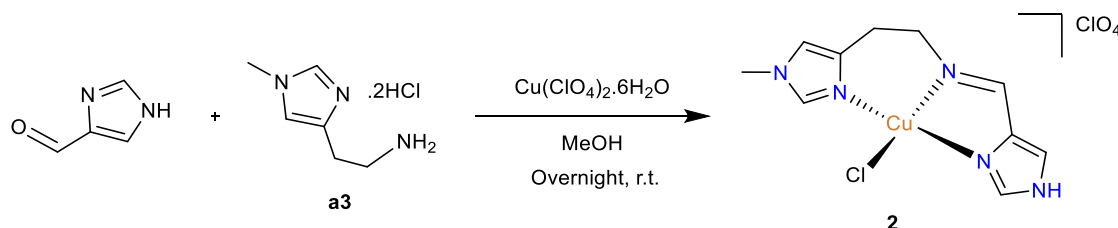

**Scheme S6:** Synthesis of **2**. Adapted from<sup>5</sup>

1H-imidazole-4-carbaldehyde (0.097 g, 1.1 mmol, 1 eq.), **a3** (0.2 g, 1.1 mmol, 1 eq.) and copper perchlorate hexahydrate (0.374 g, 1.1 mmol, 1 eq.) were dissolved in MeOH (6 mL). The mixture was stirred at room temperature overnight. The resulting suspension was cooled down to 0°C and filtered. The solid was collected, triturated in diethyl ether, filtered and dried under vacuum. Slow diffusion of ether in a methanol solution of the complex yielded the pure compound **1** as deep blue crystals (0.159 g, 36%).

**HRMS (ESI)**  $m/z$  calculated for  $C_{10}H_{13}ClCuN_5 [M+Cl]^+$  301.01555, found 301.01495,  $m/z$  calculated for  $C_{11}H_{14}CuN_5O_2 [M+Formate]^+$  311.04435, found 311.04378

**Elemental analysis:** Calculated for  $C_{10}H_{13}N_5Cl_2CuO_4$ , C, 29.9; H, 3.26; N, 17.44. Found C, 29.9; H, 3.25; N, 17.17

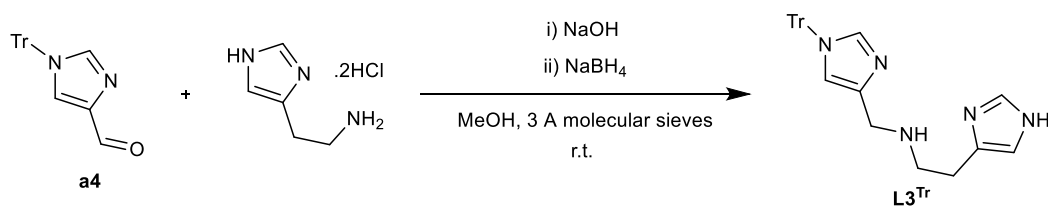

**Scheme S7:** Synthesis of **L3<sup>Tr</sup>**. Adapted from<sup>6</sup>

To a solution of **a4** (2.5 g, 7.39 mmol, 1 eq.) and histamine dihydrochloride (1.36 g, 7.39 mmol, 1 eq.) in dry methanol (75 mL, dried on 3 Å molecular sieves) under argon were added 3 Å activated molecular sieves and sodium hydroxide (0.56 g, 14.04 mmol, 1.9 eq.). The solution was stirred 3h at room temperature and  $NaBH_4$  (0.56 g, 14.78 mmol, 2 eq.) was added. After 1h at room temperature the mixture was filtered and evaporated under vacuum. The resulting

solid was extracted with water (100 mL) and dichloromethane (3 x 75 mL), the organic phases were gathered dried on Na<sub>2</sub>SO<sub>4</sub> and evaporated under vacuum to afford the product **L3<sup>Tr</sup>** as an off-white solid (2.448 g, **76%**).

**<sup>1</sup>H NMR (300 MHz, *d*<sub>6</sub>-DMSO) δ (ppm):** 7.53 – 7.23 (m, 11H), 7.15 – 6.97 (m, 6H), 6.70 (d, *J* = 6.9 Hz, 2H), 3.56 (s, 2H), 2.78 – 2.65 (m, 2H), 2.59 (t, *J* = 6.7 Hz, 2H).

**<sup>13</sup>C NMR (75 MHz, *d*<sub>6</sub>-DMSO) δ (ppm):** 142.80, 140.92, 138.09, 134.82, 129.65, 128.63, 128.40, 118.61, 74.85, 49.34, 49.05, 47.25.

**HRMS (ESI) :** *m/z* calculated for C<sub>11</sub>H<sub>17</sub>N<sub>5</sub> [M+H]<sup>+</sup> 434.23392, found 434.23404

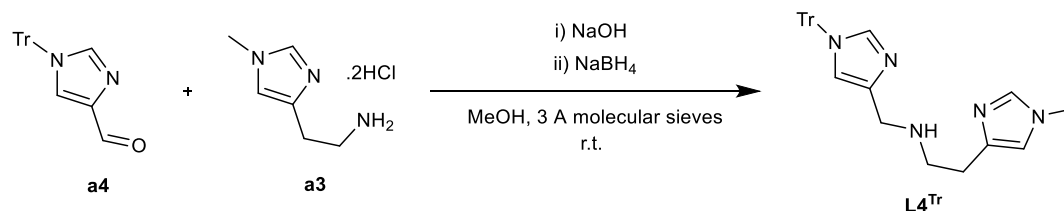

**Scheme S8:** Synthesis of **L4<sup>Tr</sup>**. Adapted from<sup>6</sup>

To a solution of **a4** (1.53 g, 4.54 mmol, 1 eq.) and **a3** (0.9 g, 4.54 mmol, 1 eq.) in dry methanol (75 mL, dried on 3 Å molecular sieves) under argon were added 3 Å activated molecular sieves and sodium hydroxide (0.364 g, 8.63 mmol, 1.9 eq.). The solution was stirred 3h at room temperature and NaBH<sub>4</sub> (0.364 g, 9.09 mmol, 2 eq.) was added. After 1h at room temperature the mixture was filtered and evaporated under vacuum. The resulting solid was extracted with water (100 mL) and dichloromethane (3 x 75 mL), the organic phases were gathered dried on Na<sub>2</sub>SO<sub>4</sub> and evaporated under vacuum to afford the product **L4<sup>Tr</sup>** as an off-white solid (1.448 g, **65%**).

**<sup>1</sup>H NMR (300 MHz, *d*<sub>6</sub>-DMSO) δ (ppm):** 7.46 – 7.27 (m, 12H), 7.09 (dd, *J* = 7.8, 1.9 Hz, 5H), 6.78 (s, 1H), 6.73 (s, 1H), 3.58 (s, 2H), 3.55 (s, *J* = 3.5 Hz, 3H), 2.72 (t, *J* = 7.0 Hz, 2H), 2.58 – 2.53 (m, 2H).

**<sup>13</sup>C NMR (75 MHz, *d*<sub>6</sub>-DMSO) δ (ppm):** 142.80, 140.80, 138.08, 137.48, 129.65, 128.64, 128.41, 118.63, 117.07, 74.87, 49.42, 47.28, 33.11, 31.14, 28.80.

**HRMS (ESI) :** *m/z* calculated for C<sub>9</sub>H<sub>14</sub>N<sub>5</sub> [M+H]<sup>+</sup> 192.12437, found 192.12410

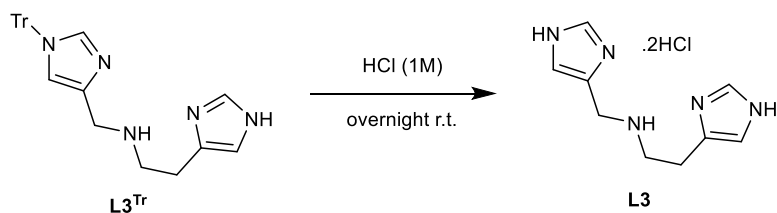

### Scheme S9: Synthesis of **L3**

The suspension of **L3**<sup>Tr</sup> (1 g, 2.31 mmol, 1 eq.) in aqueous HCl (40 mL, 1M) was stirred at room temperature overnight. The resulting suspension was filtered and the filtrate was evaporated under vacuum to afford **L3** the product as a white powder (0.566 g, **93%**).

**<sup>1</sup>H NMR (300 MHz, *d*<sub>6</sub>-DMSO) δ (ppm):** 9.16 (d, *J* = 1.2 Hz, 1H), 9.07 (d, *J* = 1.3 Hz, 1H), 7.88 (s, 1H), 7.58 (s, 1H), 4.34 (s, 2H), 3.35 – 3.28 (m, 2H), 3.22 – 3.14 (m, 3H).

**<sup>13</sup>C NMR (75 MHz, *d*<sub>6</sub>-DMSO) δ (ppm):** 134.90, 134.41, 128.99, 124.54, 121.01, 117.39, 44.72, 21.36.

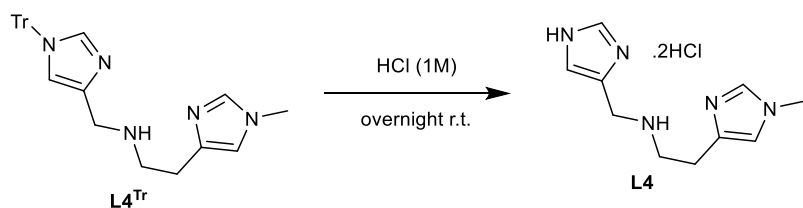

### Scheme S10: Synthesis of **L4**

The suspension of **L4**<sup>Tr</sup> (0.75 g, 1.67 mmol, 1 eq.) in aqueous HCl (40 mL, 1M) was stirred at room temperature overnight. The resulting suspension was filtered and the filtrate was evaporated under vacuum to afford the product as a white powder (0.401 g, **86%**).

**<sup>1</sup>H NMR (300 MHz, *d*<sub>6</sub>-DMSO) δ (ppm):** 9.14 (d, *J* = 1.2 Hz, 1H), 9.05 (d, *J* = 0.7 Hz, 1H), 7.88 (d, *J* = 1.0 Hz, 1H), 7.60 (d, *J* = 1.0 Hz, 1H), 4.33 (s, 2H), 3.82 (s, 3H), 3.29 (t, *J* = 7.3 Hz, 2H), 3.20 – 3.14 (t, *J* = 7.3 Hz, 2H).

**<sup>13</sup>C NMR (75 MHz, *d*<sub>6</sub>-DMSO) δ (ppm):** 136.00, 134.95, 129.34, 124.53, 121.51, 121.06, 44.80, 35.96, 21.39.



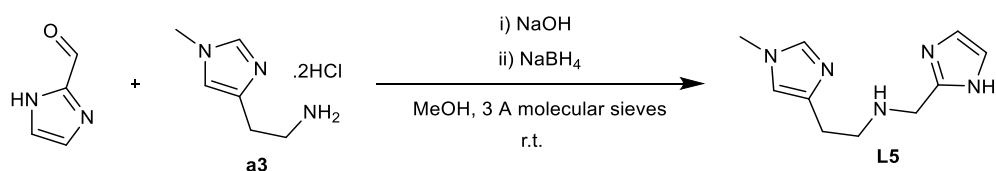

**Scheme S11:** Synthesis of **L5**. Adapted from<sup>6</sup>

To a solution of 1H-imidazole-2-carbaldehyde (1 g, 10.19 mmol, 1 eq.) and **a3** (2.02 g, 10.19 mmol, 1 eq.) in dry methanol (50 mL, dried on 3 Å molecular sieves) under argon were added 3 Å activated molecular sieves and sodium hydroxide (0.774 g, 19.36 mmol, 1.9 eq.). The solution was stirred 2h at room temperature and NaBH<sub>4</sub> (0.771 g, 20.39 mmol, 2 eq.) was added. After 3h at room temperature the mixture was filtered and evaporated under vacuum. The resulting solid was suspended in water (100 mL) and extracted with dichloromethane (3 x 75 mL) and followed with a solution of isopropanol (25%) in chloroform (3 x 100 mL). The isopropanol phases were gathered, dried on Na<sub>2</sub>SO<sub>4</sub> and evaporated under vacuum to afford the product **L5** as a white solid (1.129 g, **55%**).

**<sup>1</sup>H NMR (300 MHz, *d*<sub>6</sub>-DMSO) δ (ppm):** 7.42 (d, *J* = 0.7 Hz, 1H), 6.87 (s, 1H), 6.80 (s, 1H), 3.69 (s, 2H), 3.57 (s, 3H), 2.70 (t, *J* = 6.9 Hz, 2H), 2.55 (t, *J* = 7.1 Hz, 2H).

**<sup>13</sup>C NMR (75 MHz, *d*<sub>6</sub>-DMSO) δ (ppm):** 147.59, 140.47, 137.54, 117.19, 49.48, 46.95, 33.12, 28.81.

**HRMS (ESI) :** *m/z* calculated for C<sub>10</sub>H<sub>16</sub>N<sub>5</sub> [M+H]<sup>+</sup> 206.14002, found 2016.13987

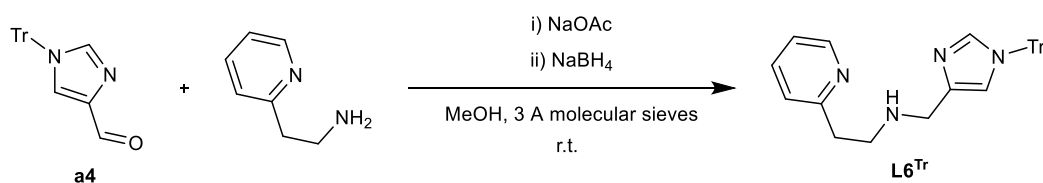

**Scheme S12:** Synthesis of **L6<sup>Tr</sup>**. Adapted from<sup>6</sup>

To a solution of **a4** (0.554 g, 1.637 mmol, 1 eq.) and 2-Pyridylethylamine (0.2 g, 1.637 mmol, 1 eq.) in dry methanol (25 mL, dried on 3 Å molecular sieves) under argon were added 3 Å activated molecular sieves and sodium acetate (0.134 g, 1.637 mmol, 1 eq.). The solution was stirred 4h at room temperature and NaBH<sub>4</sub> (0.124 g, 3.274 mmol, 2 eq.) was added. After 2h at room temperature the mixture was filtered and evaporated under vacuum. The resulting solid was suspended in water (75 mL) and extracted with dichloromethane (3 x 75 mL), the organic

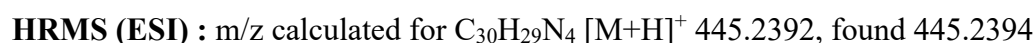

To a solution of 1-methyl-2-imidazolecarboxaldehyde (0.1 g, 0.908 mmol, 1 eq.) and 2-pyridylethylamine (0.111 g, 0.908 mmol, 1 eq.) in dry methanol (10 mL, dried on 3 Å molecular sieves) under argon were added 3 Å activated molecular sieves and sodium acetate (0.075 g, 0.908 mmol, 1 eq.). The solution was stirred 3h at room temperature and NaBH<sub>4</sub> (0.069 g, 1.816 mmol, 2 eq.) was added. After 2h at room temperature the mixture was filtered and evaporated under vacuum. The resulting solid was suspended in a saturated bicarbonate aqueous solution (50 mL) and extracted with dichloromethane (3 x 50 mL). The organic phases were gathered, dried on Na<sub>2</sub>SO<sub>4</sub> and evaporated under vacuum. The crude was purified over flash silica gel chromatography (Methanol/Net<sub>3</sub>/DCM, 5:1:94) to afford the product **L7** as a white solid (0.097 g, 50%).

**<sup>1</sup>H NMR (300 MHz, CDCl<sub>3</sub>) δ (ppm):** 8.55 – 8.48 (m, 1H), 7.58 (td, J = 7.7, 1.8 Hz, 1H), 7.19 – 7.06 (m, 2H), 6.90 (d, J = 1.1 Hz, 1H), 6.79 (d, J = 1.0 Hz, 1H), 3.87 (s, 2H), 3.61 (s, 3H), 3.10 – 3.01 (m, 2H), 3.02 – 2.92 (m, 2H).

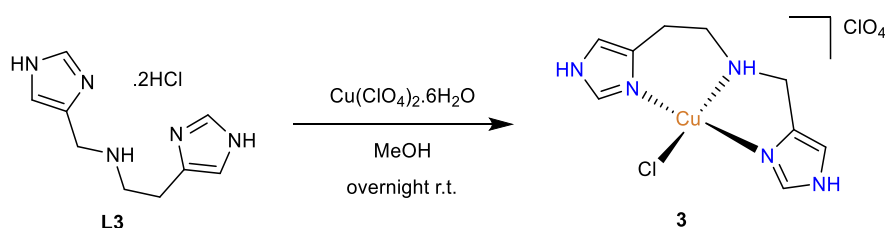

**Scheme S15:** Synthesis of **3**

**L1** (0.136 g, 0.711 mmol, 1 eq.) and copper perchlorate hexahydrate (0.263 g, 0.711 mmol, 1 eq) were dissolved in MeOH (4 mL). The mixture was stirred overnight at room temperature, diethylether was then added to the crude and a blue powder was filtered. Slow evaporation of a methanol solution of the complex yielded the pure compound **3** as deep blue crystals (0.55 g, 20%)

**HRMS (ESI):** m/z calculated for C<sub>9</sub>H<sub>13</sub>N<sub>5</sub>ClCu[M+Cl]<sup>+</sup> 289.01555, found 289.01485

**Elemental analysis:** Calculated for C<sub>9</sub>H<sub>13</sub>N<sub>5</sub>Cl<sub>2</sub>CuO<sub>4</sub>·H<sub>2</sub>O, C, 26.51; H, 3.71; N, 17.18. Found C, 26.33; H, 3.36; N, 16.38

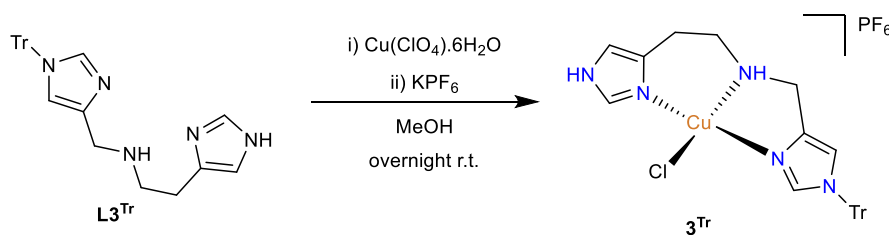

**Scheme S16:** Synthesis of **3<sup>Tr</sup>**

**L3<sup>Tr</sup>** (0.1 g, 0.231 mmol, 1 eq.) and copper chloride anhydrous (0.031 g, 0.231 mmol, 1 eq) were dissolved in 3 mL of a acetonitrile/MeOH mixture (5:1 v/v). The mixture was stirred at room temperature, after 5 minutes **KPF<sub>6</sub>** (0.085 g, 0.462 mmol, 2 eq.) was added and the resulting suspension was stirred at room temperature for 5 minutes. The precipitate was filtered and ether (100 mL) was added to the filtrate. The resulting suspension was filtered and washed with ether to yield the complex **3<sup>Tr</sup>** as a blue powder (0.154 g, **98%**).

**HRMS (ESI):**  $m/z$  calculated for  $C_{28}H_{27}N_5CuCl$   $[M+Cl]^+$  531.12455, found 531.12472

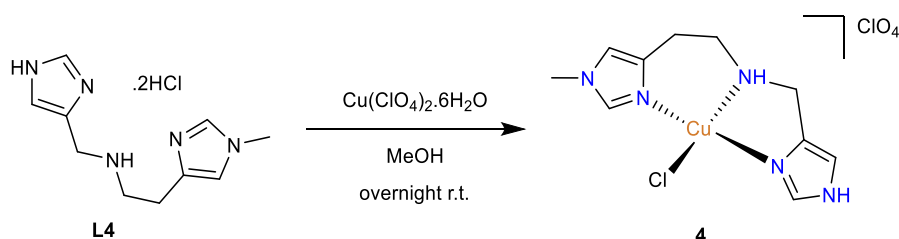

**Scheme S17:** Synthesis of **4**

**L4** (0.2 g, 0.447 mmol, 1 eq.) and copper perchlorate hexahydrate (0.16 g, 0.447 mmol, 1 eq.) were dissolved in MeOH (2 mL). The mixture was stirred at room temperature, after 2h triethylamine (0.09 g, 0.894 mmol, 2 eq.) was added and the suspension filtered. The solid was resuspended in methanol and trifluoroacetic acid was added (0.102 g, 0.894 mmol, 2 eq.), the resulting solution was stirred 2h at room temperature then evaporated under vacuum. Slow diffusion of ether in a methanol solution of the complex yielded the pure compound **4** as deep blue crystals (0.255 g, **37%**).

**HRMS (ESI):**  $m/z$  calculated for  $C_{10}H_{15}N_5CuCl$   $[M+Cl]^+$  303.03120, found 303.03073

**Elemental analysis:** Calculated for  $C_{10}H_{15}N_5Cl_2CuO_4$ , C, 29.75; H, 3.75; N, 17.35. Found C, 29.86; H, 3.72; N, 17.05

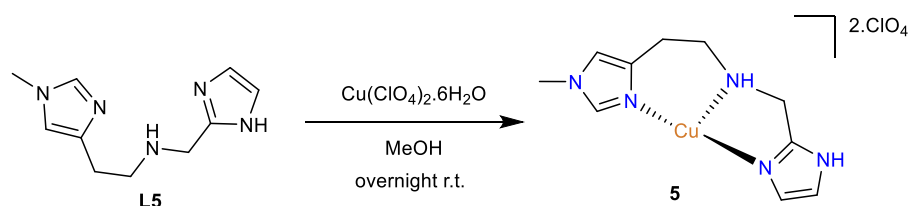

**Scheme S18:** Synthesis of **5**

**L5** (0.1 g, 0.487 mmol, 1 eq.) and copper perchlorate hexahydrate (0.181 g, 0.487 mmol, 1 eq.) were dissolved in MeOH (2 mL). The mixture was stirred 4 h at 60°C then room temperature overnight. Diethylether was then added to the crude and the solution was filtered to afford the complex **5** as deep blue crystals (0.120 g, **48%**).

**HRMS (ESI):**  $m/z$  calculated for  $C_{10}H_{15}N_5Cu$   $[M-H]^+$  267.05397, found 267.05389

**Elemental analysis:** Calculated for  $C_{10}H_{15}N_5Cl_2CuO_8 \cdot 2H_2O$ , C, 23.83; H, 3.80; N, 13.90. Found C, 23.43; H, 3.84; N, 13.34

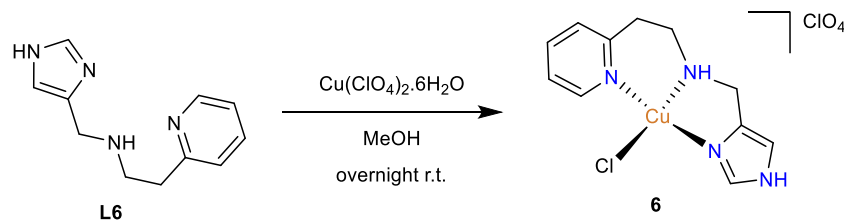

**Scheme S19:** Synthesis of **6**

**L6** (0.2 g, 0.727 mmol, 1 eq.) and copper perchlorate hexahydrate (0.269 g, 0.727 mmol, 1 eq.) were dissolved in MeOH (10 mL). The mixture was stirred overnight at room temperature, diethylether was then added to the crude and a blue powder was filtered. Slow diffusion of ether in a methanol solution of the complex yielded the pure compound **6** as deep blue crystals (0.0845 g, **28%**).

**HRMS (ESI):**  $m/z$  calculated for  $C_{11}H_{14}N_4Cu$   $[M-H]^+$  300.02030, found 300.01959

**Elemental analysis:** Calculated for  $C_{11}H_{14}N_4Cl_2CuO_4$ , C, 32.97; H, 3.52; N, 13.98. Found C 32.34; H 3.33; N, 13.81

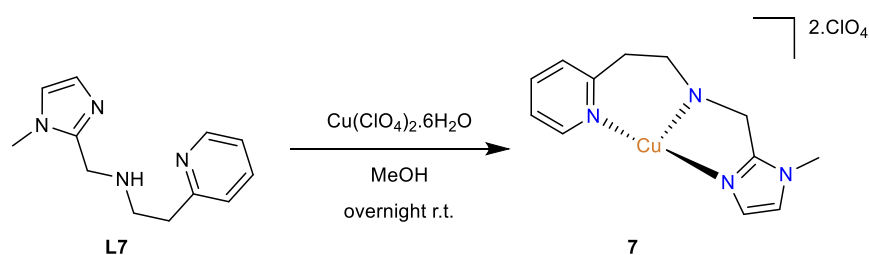

**Scheme S20: Synthesis of **7****

**L7** (0.0972 g, 0.449 mmol, 1 eq.) and copper perchlorate hexahydrate (0.166 g, 0.449 mmol, 1 eq.) were dissolved in MeOH (3 mL). The mixture was stirred overnight at room temperature, diethylether was then added to the crude and a blue powder was filtered. Slow diffusion of ether in a methanol solution of the complex yielded the pure compound **7** as deep blue crystals (0.162 g, **71%**).

**Elemental analysis:** Calculated for  $\text{C}_{13}\text{H}_{20}\text{N}_4\text{Cl}_2\text{CuO}_9$ , C, 30.57; H, 3.95; N, 10.97. Found C, 30.31; H, 3.87; N, 10.75

### 3) X-ray diffraction crystallography

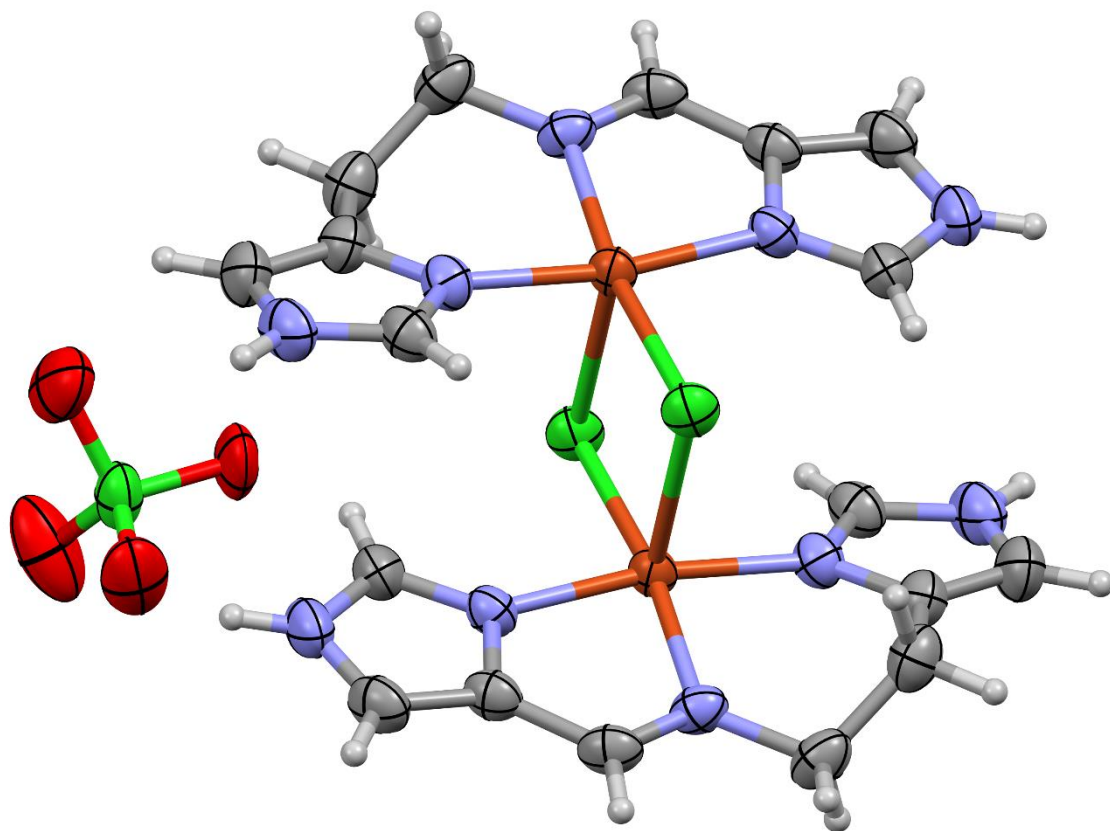

**Figure S1:** Ortep representation of **1** with displacement ellipsoids drawn at the 50% probability level. The minor part of the disordered perchlorate anion was omitted for clarity.

**Table S1:** Crystal data and structure refinement for **1**

|                                      |                                                                                                                                       |
|--------------------------------------|---------------------------------------------------------------------------------------------------------------------------------------|
| Identification code                  | Complex 1                                                                                                                             |
| CCDC Deposition Number               | 2369751                                                                                                                               |
| Empirical formula                    | C <sub>18</sub> H <sub>22</sub> Cl <sub>4</sub> Cu <sub>2</sub> N <sub>10</sub> O <sub>8</sub>                                        |
| Formula weight                       | 775.33                                                                                                                                |
| Temperature                          | 293(2) K                                                                                                                              |
| Wavelength                           | 0.71073 Å                                                                                                                             |
| Crystal system                       | Triclinic                                                                                                                             |
| Space group                          | P-1                                                                                                                                   |
| Unit cell dimensions                 | a = 7.2149(9) Å<br>b = 8.6311(15) Å<br>c = 12.702(2) Å<br>$\alpha$ = 98.960(15)°<br>$\beta$ = 101.239(14)°<br>$\gamma$ = 112.587(15)° |
| Volume                               | 692.7(2) Å <sup>3</sup>                                                                                                               |
| Z                                    | 1                                                                                                                                     |
| Density (calculated)                 | 1.859 Mg/m <sup>3</sup>                                                                                                               |
| Absorption coefficient               | 1.985 mm <sup>-1</sup>                                                                                                                |
| F(000)                               | 390                                                                                                                                   |
| Crystal size                         | 0.40 x 0.20 x 0.03 mm <sup>3</sup>                                                                                                    |
| Theta range for data collection      | 3.151 to 26.145°                                                                                                                      |
| Reflections collected                | 9837                                                                                                                                  |
| Independent reflections              | 2735 [ $R_{\text{int}}$ = 0.0301]                                                                                                     |
| Completeness to theta = 25.242°      | 99.7 %                                                                                                                                |
| Absorption correction                | Semi-empirical from equivalents                                                                                                       |
| Max. and min. transmission           | 1.00000 and 0.70219                                                                                                                   |
| Refinement method                    | Full-matrix least-squares on F <sup>2</sup>                                                                                           |
| Data / restraints / parameters       | 2735 / 30 / 227                                                                                                                       |
| Goodness-of-fit on F <sup>2</sup>    | 1.050                                                                                                                                 |
| Final R indices [ $I > 2\sigma(I)$ ] | $R_1$ = 0.0273, $wR_2$ = 0.0736                                                                                                       |
| R indices (all data)                 | $R_1$ = 0.0295, $wR_2$ = 0.0747                                                                                                       |
| Largest diff. peak and hole          | 0.303 and -0.332 e.Å <sup>-3</sup>                                                                                                    |



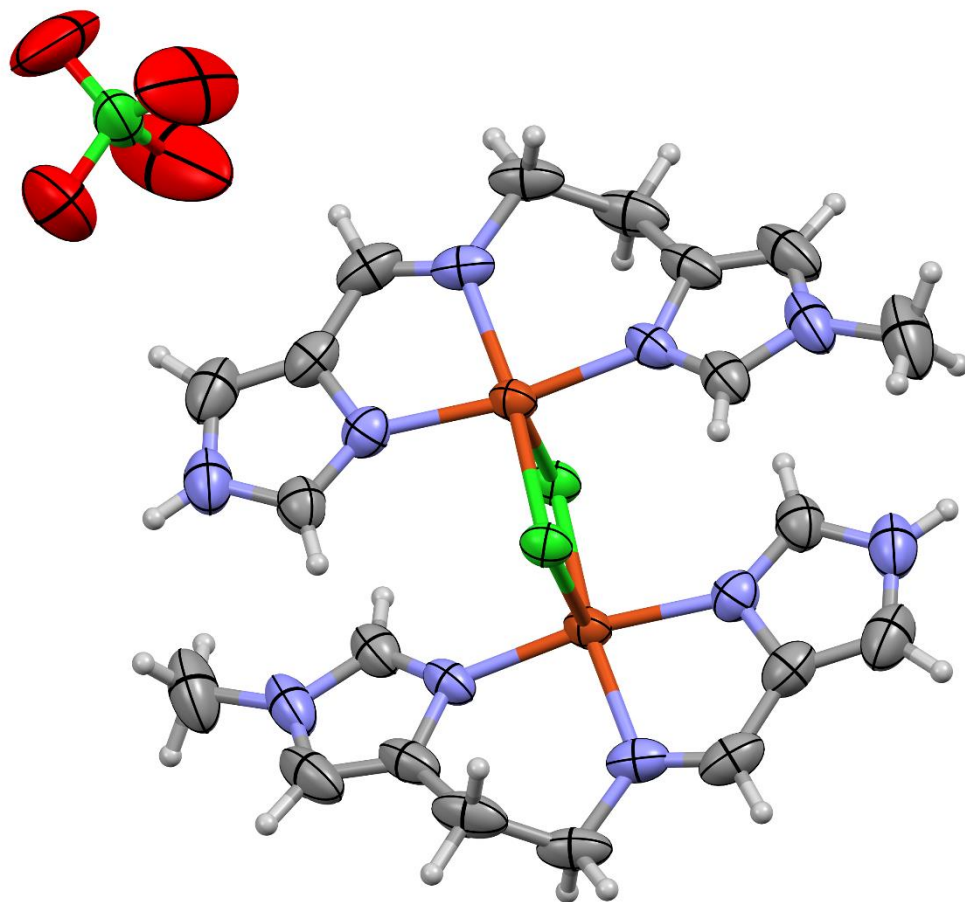

**Figure S2:** Ortep representation of **2** with displacement ellipsoids drawn at the 50% probability level. The minor part of the disordered perchlorate anion was omitted for clarity.

**Table S2** : Crystal data and structure refinement for **2**

|                                      |                                                                                                                                           |
|--------------------------------------|-------------------------------------------------------------------------------------------------------------------------------------------|
| Identification code                  | Complex 2                                                                                                                                 |
| CCDC Deposition Number               | 2369752                                                                                                                                   |
| Empirical formula                    | C <sub>20</sub> H <sub>26</sub> Cl <sub>4</sub> Cu <sub>2</sub> N <sub>10</sub> O <sub>8</sub>                                            |
| Formula weight                       | 803.39                                                                                                                                    |
| Temperature                          | 293(2) K                                                                                                                                  |
| Wavelength                           | 0.71073 Å                                                                                                                                 |
| Crystal system                       | Triclinic                                                                                                                                 |
| Space group                          | P-1                                                                                                                                       |
| Unit cell dimensions                 | a = 7.3349(9) Å<br>b = 8.8634(12) Å<br>c = 12.9399(12) Å<br>$\alpha$ = 106.261(10)°.<br>$\beta$ = 90.179(8)°.<br>$\gamma$ = 109.045(12)°. |
| Volume                               | 759.25(16) Å <sup>3</sup>                                                                                                                 |
| Z                                    | 1                                                                                                                                         |
| Density (calculated)                 | 1.757 Mg/m <sup>3</sup>                                                                                                                   |
| Absorption coefficient               | 1.814 mm <sup>-1</sup>                                                                                                                    |
| F(000)                               | 406                                                                                                                                       |
| Crystal size                         | 0.22 x 0.07 x 0.03 mm <sup>3</sup>                                                                                                        |
| Theta range for data collection      | 2.954 to 26.117°.                                                                                                                         |
| Reflections collected                | 9645                                                                                                                                      |
| Independent reflections              | 2986 [ $R_{\text{(int)}} = 0.0476$ ]                                                                                                      |
| Completeness to theta = 25.242°      | 99.7 %                                                                                                                                    |
| Absorption correction                | Semi-empirical from equivalents                                                                                                           |
| Max. and min. transmission           | 1.00000 and 0.62792                                                                                                                       |
| Refinement method                    | Full-matrix least-squares on F <sup>2</sup>                                                                                               |
| Data / restraints / parameters       | 2986 / 6 / 237                                                                                                                            |
| Goodness-of-fit on F <sup>2</sup>    | 1.089                                                                                                                                     |
| Final R indices [ $I > 2\sigma(I)$ ] | $R_1 = 0.0371$ , $wR_2 = 0.0951$                                                                                                          |
| R indices (all data)                 | $R_1 = 0.0418$ , $wR_2 = 0.0979$                                                                                                          |
| Largest diff. peak and hole          | 0.434 and -0.426 e.Å <sup>-3</sup>                                                                                                        |

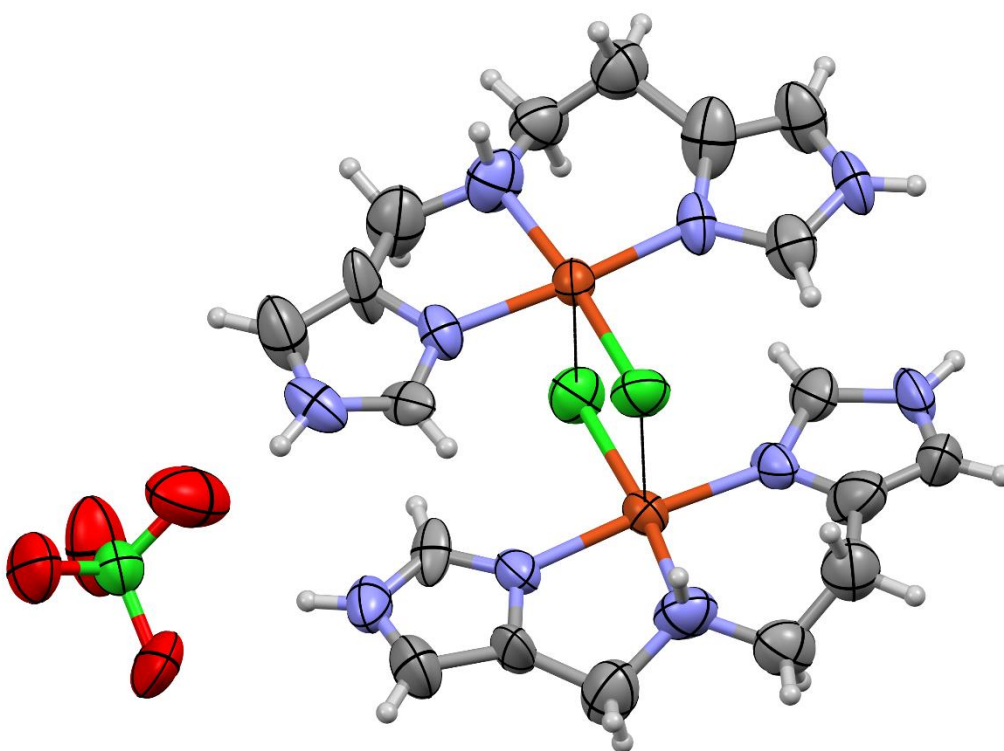

**Figure S3:** Ortep representation of **3** with displacement ellipsoids drawn at the 50% probability level. The dashed lines between the Cu and Cl atoms are added to show the proximity of both complexes, such that both shown complexes could be considered a dimer.

**Table S3:** Crystal data and structure refinement for **3**

|                                      |                                                                                                                                   |
|--------------------------------------|-----------------------------------------------------------------------------------------------------------------------------------|
| Identification code                  | Complex 3                                                                                                                         |
| CCDC Deposition Number               | 2369753                                                                                                                           |
| Empirical formula                    | C <sub>9</sub> H <sub>12</sub> Cl <sub>2</sub> Cu N <sub>5</sub> O <sub>4</sub>                                                   |
| Formula weight                       | 388.68                                                                                                                            |
| Temperature                          | 297(2) K                                                                                                                          |
| Wavelength                           | 0.71073 Å                                                                                                                         |
| Crystal system                       | Orthorhombic                                                                                                                      |
| Space group                          | Pna2 <sub>1</sub>                                                                                                                 |
| Unit cell dimensions                 | a = 6.3467(8) Å<br>b = 17.642(2) Å<br>c = 13.4662(12) Å<br>$\alpha = 90^\circ$ .<br>$\beta = 90^\circ$ .<br>$\gamma = 90^\circ$ . |
| Volume                               | 1507.8(3) Å <sup>3</sup>                                                                                                          |
| Z                                    | 4                                                                                                                                 |
| Density (calculated)                 | 1.717 Mg/m <sup>3</sup>                                                                                                           |
| Absorption coefficient               | 1.824 mm <sup>-1</sup>                                                                                                            |
| F(000)                               | 788                                                                                                                               |
| Crystal size                         | 0.24 x 0.12 x 0.07 mm <sup>3</sup>                                                                                                |
| Theta range for data collection      | 3.411 to 26.391°.                                                                                                                 |
| Reflections collected                | 7905                                                                                                                              |
| Independent reflections              | 2959 [ $R_{\text{int}} = 0.0616$ ]                                                                                                |
| Completeness to theta = 25.242°      | 99.6 %                                                                                                                            |
| Absorption correction                | Semi-empirical from equivalents                                                                                                   |
| Max. and min. transmission           | 1.00000 and 0.85609                                                                                                               |
| Refinement method                    | Full-matrix least-squares on F <sup>2</sup>                                                                                       |
| Data / restraints / parameters       | 2959 / 118 / 191                                                                                                                  |
| Goodness-of-fit on F <sup>2</sup>    | 1.057                                                                                                                             |
| Final R indices [ $I > 2\sigma(I)$ ] | $R_1 = 0.0595$ , $wR_2 = 0.1541$                                                                                                  |
| R indices (all data)                 | $R_1 = 0.0769$ , $wR_2 = 0.1660$                                                                                                  |
| Largest diff. peak and hole          | 0.559 and -0.382 e.Å <sup>-3</sup>                                                                                                |

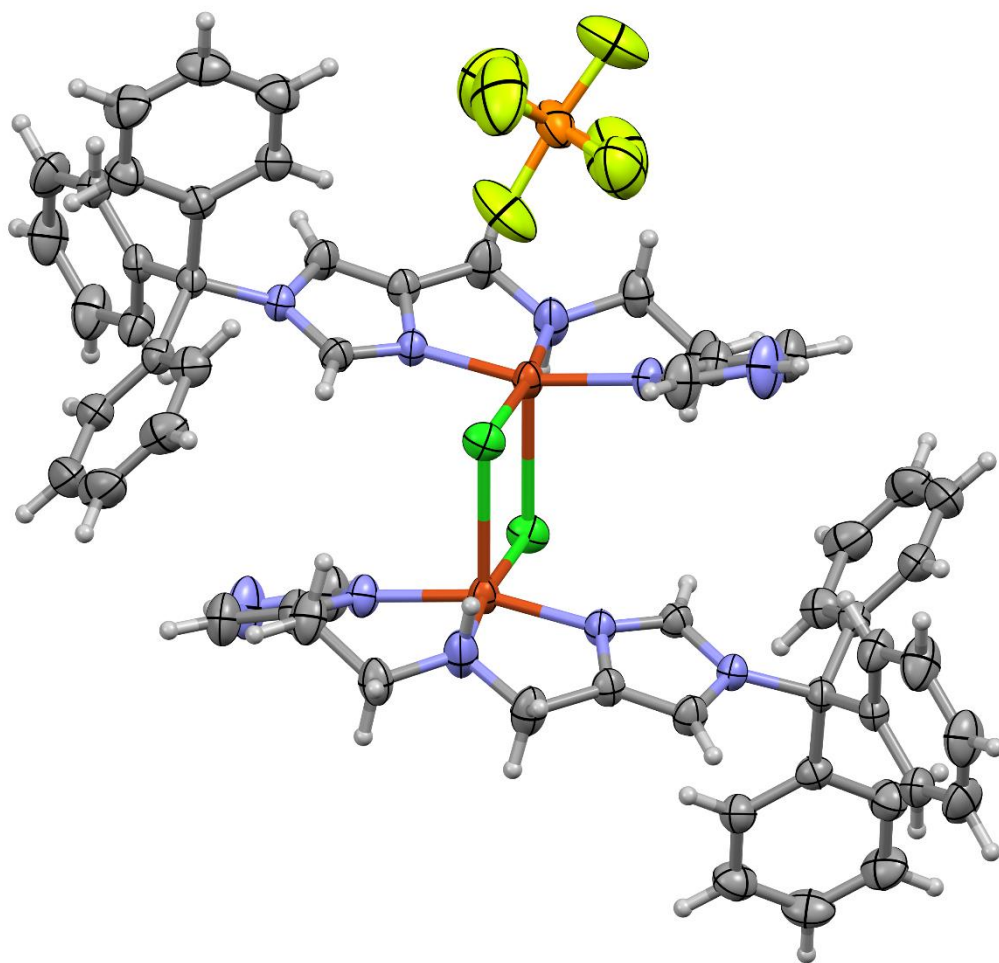

**Figure S4:** Ortep representation of **3<sup>Tr</sup>** with displacement ellipsoids drawn at the 50% probability level.

**Table S4:** Crystal data and structure refinement for **3<sup>Tr</sup>**

|                                   |                                                                                                                |
|-----------------------------------|----------------------------------------------------------------------------------------------------------------|
| Identification code               | Complex 3 <sup>Tr</sup>                                                                                        |
| CCDC Deposition Number            | 2369758                                                                                                        |
| Empirical formula                 | C <sub>56</sub> H <sub>54</sub> Cl <sub>2</sub> Cu <sub>2</sub> F <sub>12</sub> N <sub>10</sub> P <sub>2</sub> |
| Formula weight                    | 1355.01                                                                                                        |
| Temperature                       | 297(2) K                                                                                                       |
| Wavelength                        | 0.71073 Å                                                                                                      |
| Crystal system                    | Monoclinic                                                                                                     |
| Space group                       | C2/c                                                                                                           |
| Unit cell dimensions              | a = 33.2550(11) Å<br>a = 90°.<br>b = 7.3015(3) Å<br>b = 99.704(3)°.<br>c = 23.7923(8) Å<br>g = 90°.            |
| Volume                            | 5694.4(3) Å <sup>3</sup>                                                                                       |
| Z                                 | 4                                                                                                              |
| Density (calculated)              | 1.581 Mg/m <sup>3</sup>                                                                                        |
| Absorption coefficient            | 0.985 mm <sup>-1</sup>                                                                                         |
| F(000)                            | 2760                                                                                                           |
| Crystal size                      | 0.50 x 0.12 x 0.02 mm <sup>3</sup>                                                                             |
| Theta range for data collection   | 3.018 to 26.332°.                                                                                              |
| Independent reflections           | 5755 [R <sub>(int)</sub> = 0.0411]                                                                             |
| Completeness to theta = 25.242°   | 99.8 %                                                                                                         |
| Absorption correction             | Semi-empirical from equivalents                                                                                |
| Max. and min. transmission        | 1.00000 and 0.90673                                                                                            |
| Refinement method                 | Full-matrix least-squares on F <sup>2</sup>                                                                    |
| Data / restraints / parameters    | 5755 / 18 / 404                                                                                                |
| Goodness-of-fit on F <sup>2</sup> | 1.039                                                                                                          |
| Final R indices [I > 2sigma(I)]   | R <sub>1</sub> = 0.0421, wR <sub>2</sub> = 0.1061                                                              |
| R indices (all data)              | R <sub>1</sub> = 0.0558, wR <sub>2</sub> = 0.1129                                                              |
| Largest diff. peak and hole       | 0.497 and -0.410 e.Å <sup>-3</sup>                                                                             |

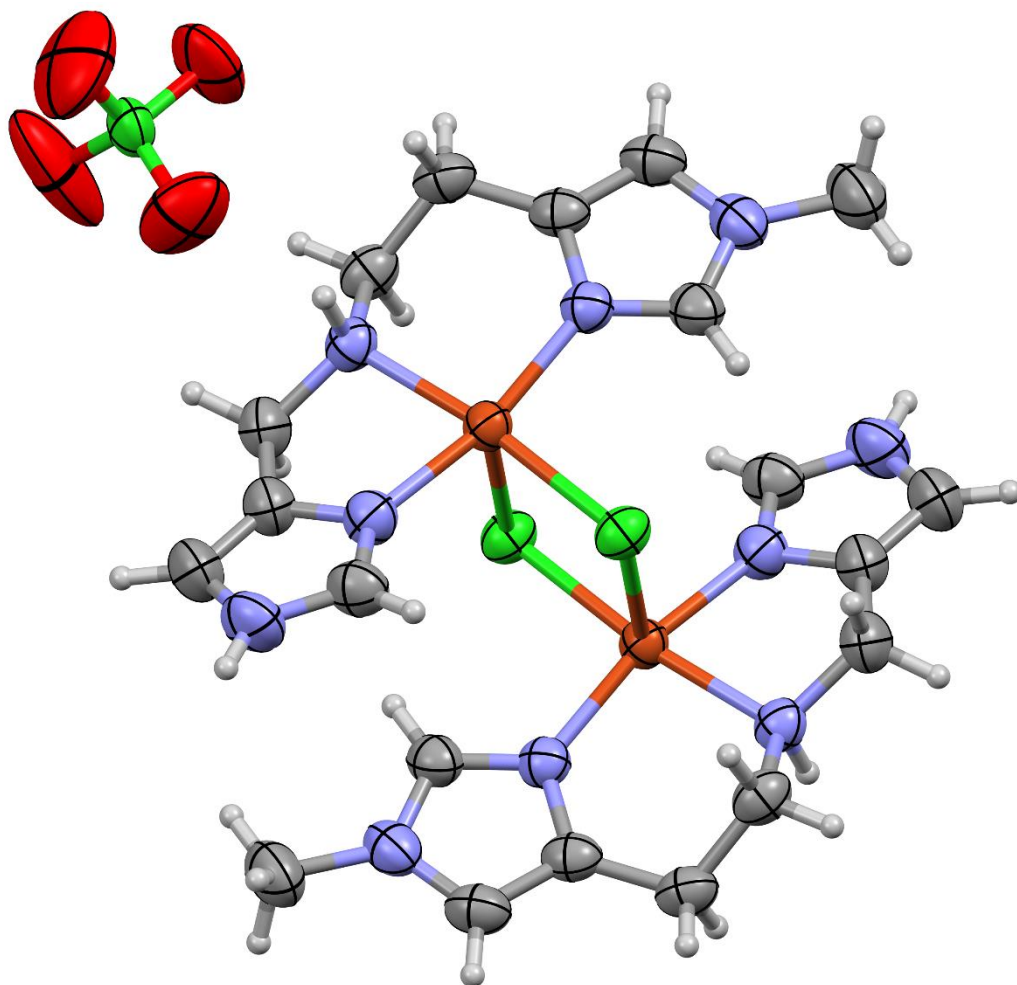

**Figure S5:** Ortep representation of **4** with displacement ellipsoids drawn at the 50% probability level. The minor part of the disordered perchlorate anion was omitted for clarity.

**Table S5:** Crystal data and structure refinement for **4**

|                                         |                                                                                                                                                             |
|-----------------------------------------|-------------------------------------------------------------------------------------------------------------------------------------------------------------|
| Identification code                     | Complex 4                                                                                                                                                   |
| CCDC Deposition Number                  | 2369754                                                                                                                                                     |
| Empirical formula                       | C <sub>20</sub> H <sub>30</sub> Cl <sub>4</sub> Cu <sub>2</sub> N <sub>10</sub> O <sub>8</sub>                                                              |
| Formula weight                          | 807.42                                                                                                                                                      |
| Temperature                             | 297(2) K                                                                                                                                                    |
| Wavelength                              | 0.71073 Å                                                                                                                                                   |
| Crystal system                          | Triclinic                                                                                                                                                   |
| Space group                             | P-1                                                                                                                                                         |
| Unit cell dimensions                    | $a = 7.5005(15)$ Å<br>$b = 8.931(2)$ Å<br>$c = 12.916(2)$ Å<br>$\alpha = 80.624(17)^\circ$ .<br>$\beta = 73.129(16)^\circ$ .<br>$\gamma = 69.64(2)^\circ$ . |
| Volume                                  | $774.4(3)$ Å <sup>3</sup>                                                                                                                                   |
| Z                                       | 1                                                                                                                                                           |
| Density (calculated)                    | 1.731 Mg/m <sup>3</sup>                                                                                                                                     |
| Absorption coefficient                  | 1.779 mm <sup>-1</sup>                                                                                                                                      |
| F(000)                                  | 410                                                                                                                                                         |
| Crystal size                            | 0.13 x 0.12 x 0.04 mm <sup>3</sup>                                                                                                                          |
| Theta range for data collection         | 2.849 to 26.203°.                                                                                                                                           |
| Reflections collected                   | 10998                                                                                                                                                       |
| Independent reflections                 | 3043 [ $R_{\text{(int)}} = 0.0329$ ]                                                                                                                        |
| Completeness to $\theta = 25.242^\circ$ | 98.5 %                                                                                                                                                      |
| Absorption correction                   | Semi-empirical from equivalents                                                                                                                             |
| Max. and min. transmission              | 1.00000 and 0.85032                                                                                                                                         |
| Refinement method                       | Full-matrix least-squares on F <sup>2</sup>                                                                                                                 |
| Data / restraints / parameters          | 3043 / 56 / 246                                                                                                                                             |
| Goodness-of-fit on F <sup>2</sup>       | 1.051                                                                                                                                                       |
| Final R indices [ $I > 2\sigma(I)$ ]    | $R_1 = 0.0422$ , $wR_2 = 0.1098$                                                                                                                            |
| R indices (all data)                    | $R_1 = 0.0479$ , $wR_2 = 0.1130$                                                                                                                            |
| Largest diff. peak and hole             | 0.504 and -0.549 e.Å <sup>-3</sup>                                                                                                                          |



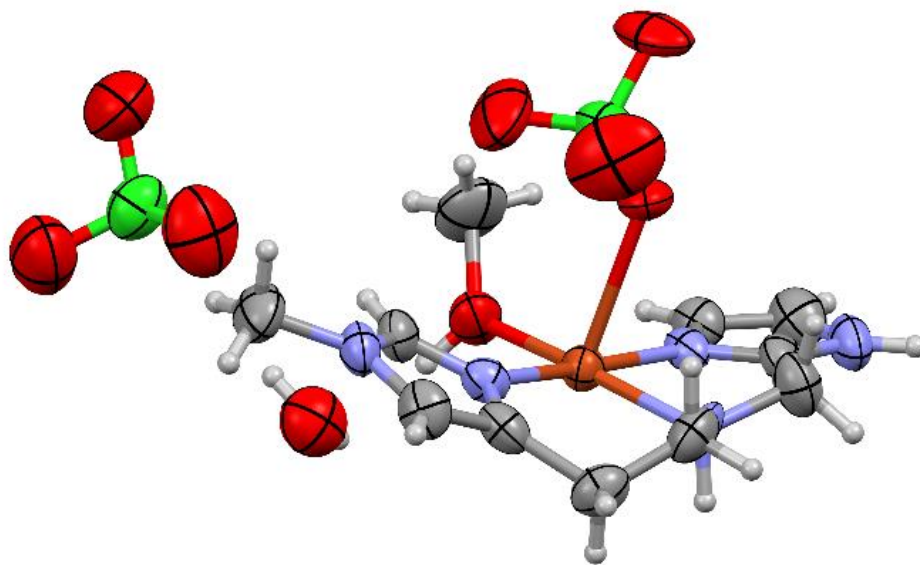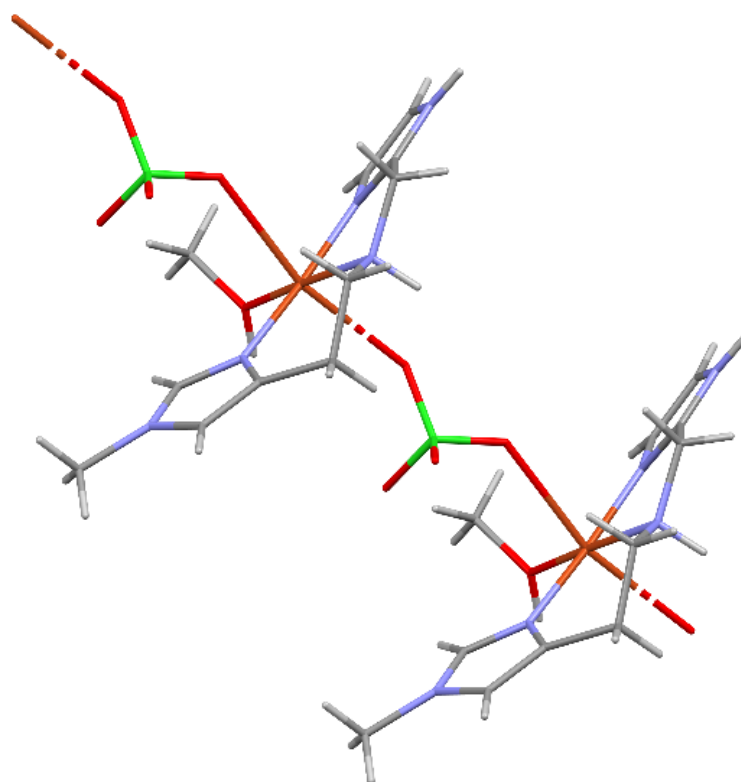

**Figure S6:** (top) Ortep representation of **5** with displacement ellipsoids drawn at the 50% probability level. (Bottom) 1D coordination chain where the complexes are linked by coordinating perchlorate anions. The minor parts of the disordered perchlorate anions were omitted for clarity.

**Table S6:** Crystal data and structure refinement for **5**

|                                      |                                                                                                                                     |
|--------------------------------------|-------------------------------------------------------------------------------------------------------------------------------------|
| Identification code                  | Complex 5                                                                                                                           |
| CCDC Deposition Number               | 2369755                                                                                                                             |
| Empirical formula                    | C11 H21 Cl2 Cu N5 O10                                                                                                               |
| Formula weight                       | 517.77                                                                                                                              |
| Temperature                          | 297(2) K                                                                                                                            |
| Wavelength                           | 0.71073 Å                                                                                                                           |
| Crystal system                       | Orthorhombic                                                                                                                        |
| Space group                          | P2 <sub>1</sub> 2 <sub>1</sub> 2 <sub>1</sub>                                                                                       |
| Unit cell dimensions                 | a = 7.2615(9) Å<br>b = 16.4041(17) Å<br>c = 16.7373(16) Å<br>$\alpha = 90^\circ$ .<br>$\beta = 90^\circ$ .<br>$\gamma = 90^\circ$ . |
| Volume                               | 1993.7(4) Å <sup>3</sup>                                                                                                            |
| Z                                    | 4                                                                                                                                   |
| Density (calculated)                 | 1.725 Mg/m <sup>3</sup>                                                                                                             |
| Absorption coefficient               | 1.424 mm <sup>-1</sup>                                                                                                              |
| F(000)                               | 1060                                                                                                                                |
| Crystal size                         | 0.15 x 0.06 x 0.05 mm <sup>3</sup>                                                                                                  |
| Theta range for data collection      | 3.301 to 25.349°.                                                                                                                   |
| Reflections collected                | 8064                                                                                                                                |
| Independent reflections              | 3518 [ $R_{\text{(int)}} = 0.0834$ ]                                                                                                |
| Completeness to theta = 25.242°      | 99.1 %                                                                                                                              |
| Absorption correction                | Semi-empirical from equivalents                                                                                                     |
| Max. and min. transmission           | 1.00000 and 0.69867                                                                                                                 |
| Refinement method                    | Full-matrix least-squares on F <sup>2</sup>                                                                                         |
| Data / restraints / parameters       | 3518 / 259 / 326                                                                                                                    |
| Goodness-of-fit on F <sup>2</sup>    | 1.092                                                                                                                               |
| Final R indices [ $I > 2\sigma(I)$ ] | $R_1 = 0.0802$ , $wR_2 = 0.1801$                                                                                                    |
| R indices (all data)                 | $R_1 = 0.1136$ , $wR_2 = 0.1975$                                                                                                    |
| Largest diff. peak and hole          | 0.946 d -0.398 e.Å <sup>-3</sup>                                                                                                    |

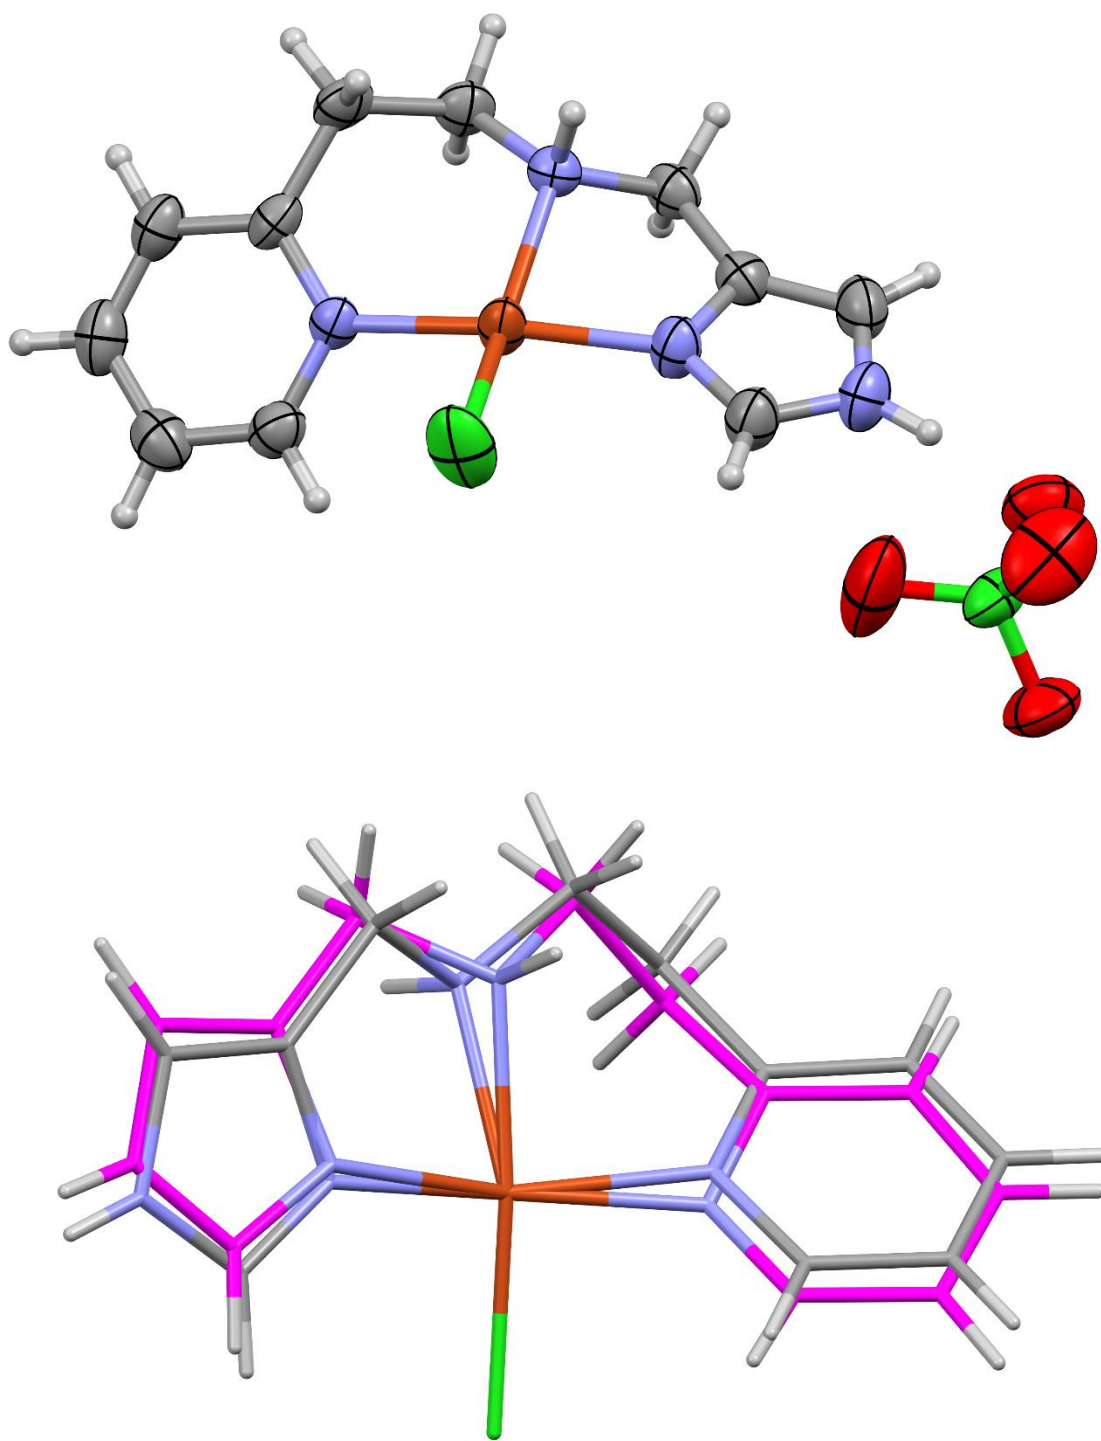

**Figure S7:** (top) Ortep representation of **6** with displacement ellipsoids drawn at the 50% probability level. The minor part of the disordered perchlorate anion was omitted for clarity. (Bottom) The observed disorder of the ligand, minor part shown with carbon atom.

**Table S7:** Crystal data and structure refinement for **6**

|                                   |                                                                                                    |
|-----------------------------------|----------------------------------------------------------------------------------------------------|
| Identification code               | Complex 6                                                                                          |
| CCDC Deposition Number            | 2369756                                                                                            |
| Empirical formula                 | C11 H14 Cl2 Cu N4 O4                                                                               |
| Formula weight                    | 400.70                                                                                             |
| Temperature                       | 297(2) K                                                                                           |
| Wavelength                        | 0.71073 Å                                                                                          |
| Crystal system                    | Monoclinic                                                                                         |
| Space group                       | P21/n                                                                                              |
| Unit cell dimensions              | a = 12.8007(9) Å<br>a= 90°.<br>b = 8.0922(4) Å<br>b= 108.525(7)°.<br>c = 15.2526(10) Å<br>g = 90°. |
| Volume                            | 1498.09(18) Å <sup>3</sup>                                                                         |
| Z                                 | 4                                                                                                  |
| Density (calculated)              | 1.777 Mg/m <sup>3</sup>                                                                            |
| Absorption coefficient            | 1.837 mm <sup>-1</sup>                                                                             |
| F(000)                            | 812                                                                                                |
| Crystal size                      | 0.40 x 0.15 x 0.04 mm <sup>3</sup>                                                                 |
| Theta range for data collection   | 3.104 to 26.323°.                                                                                  |
| Reflections collected             | 12848                                                                                              |
| Independent reflections           | 3021 [R(int) = 0.0271]                                                                             |
| Completeness to theta = 25.242°   | 99.5 %                                                                                             |
| Absorption correction             | Semi-empirical from equivalents                                                                    |
| Max. and min. transmission        | 1.00000 and 0.45546                                                                                |
| Refinement method                 | Full-matrix least-squares on F <sup>2</sup>                                                        |
| Data / restraints / parameters    | 3021 / 74 / 236                                                                                    |
| Goodness-of-fit on F <sup>2</sup> | 0.872                                                                                              |
| Final R indices [I>2sigma(I)]     | R1 = 0.0333, wR2 = 0.0827                                                                          |
| R indices (all data)              | R1 = 0.0372, wR2 = 0.0855                                                                          |
| Largest diff. peak and hole       | 0.706 and -0.323 e.Å <sup>-3</sup>                                                                 |

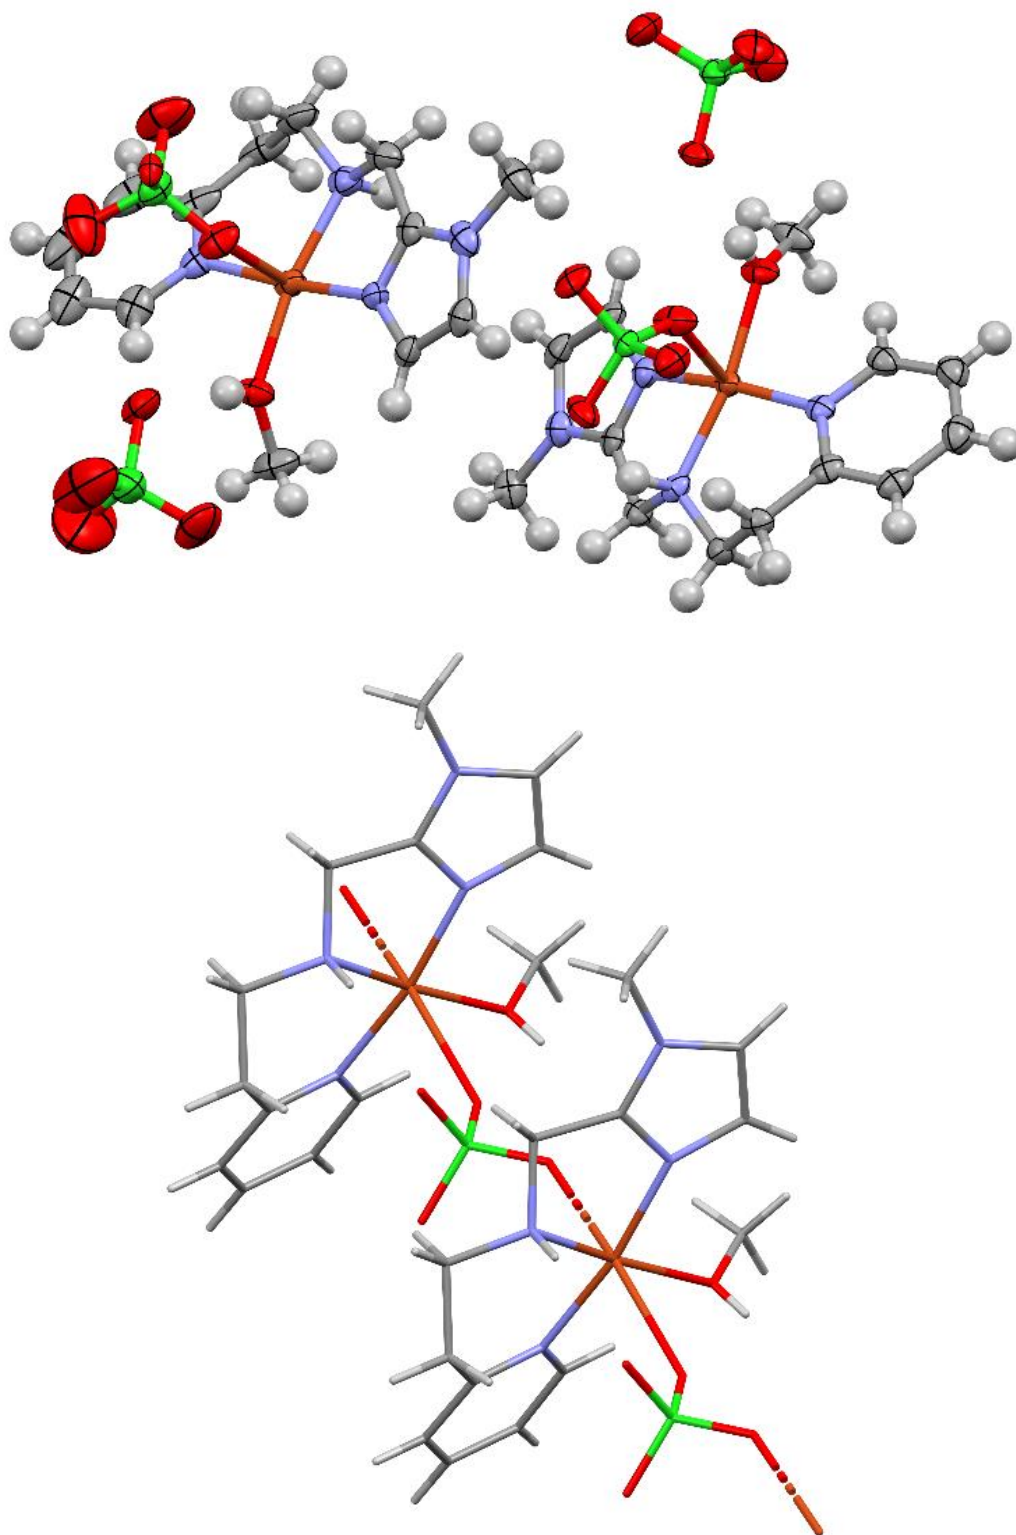

**Figure S8:** (top) Ortep representation of **7** with displacement ellipsoids drawn at the 50% probability level. (bottom) 1D coordination chain where the complexes are linked by coordinating perchlorate anions. The minor parts of the disordered perchlorate anions were omitted for clarity.

Complex **7** is reported previously by the Simaan group<sup>7</sup> but with a coordinated acetonitrile (CCDC 1476063) instead of a coordinated methanol.

**Table S8:** Crystal data and structure refinement for **7**

|                                   |                                                                                                                                           |
|-----------------------------------|-------------------------------------------------------------------------------------------------------------------------------------------|
| Identification code               | Complex 7                                                                                                                                 |
| CCDC Deposition Number            | 2369757                                                                                                                                   |
| Empirical formula                 | C <sub>13</sub> H <sub>20</sub> Cl <sub>2</sub> Cu N <sub>4</sub> O <sub>9</sub>                                                          |
| Formula weight                    | 510.77                                                                                                                                    |
| Temperature                       | 150(2) K                                                                                                                                  |
| Wavelength                        | 0.71073 Å                                                                                                                                 |
| Crystal system                    | Monoclinic                                                                                                                                |
| Space group                       | P2 <sub>1</sub> /c                                                                                                                        |
| Unit cell dimensions              | a = 29.258(2) Å<br>b = 7.1874(3) Å<br>c = 19.1948(19) Å<br>$\alpha = 90^\circ$ .<br>$\beta = 99.360(10)^\circ$ .<br>$\gamma = 90^\circ$ . |
| Volume                            | 3982.7(5) Å <sup>3</sup>                                                                                                                  |
| Z                                 | 8                                                                                                                                         |
| Density (calculated)              | 1.704 Mg/m <sup>3</sup>                                                                                                                   |
| Absorption coefficient            | 1.420 mm <sup>-1</sup>                                                                                                                    |
| F(000)                            | 2088                                                                                                                                      |
| Crystal size                      | 0.50 x 0.14 x 0.03 mm <sup>3</sup>                                                                                                        |
| Theta range for data collection   | 2.921 to 26.002°.                                                                                                                         |
| Reflections collected             | 21207                                                                                                                                     |
| Independent reflections           | 7701 [R <sub>(int)</sub> = 0.0455]                                                                                                        |
| Completeness to theta = 25.242°   | 99.5 %                                                                                                                                    |
| Absorption correction             | Semi-empirical from equivalents                                                                                                           |
| Max. and min. transmission        | 1.00000 and 0.67010                                                                                                                       |
| Refinement method                 | Full-matrix least-squares on F <sup>2</sup>                                                                                               |
| Data / restraints / parameters    | 7701 / 330 / 641                                                                                                                          |
| Goodness-of-fit on F <sup>2</sup> | 1.112                                                                                                                                     |
| Final R indices [I > 2sigma(I)]   | R <sub>1</sub> = 0.0705, wR <sub>2</sub> = 0.1593                                                                                         |
| R indices (all data)              | R <sub>1</sub> = 0.0790, wR <sub>2</sub> = 0.1638                                                                                         |
| Largest diff. peak and hole       | 1.510 and -1.098 e.Å <sup>-3</sup>                                                                                                        |

#### 4) EPR spectroscopy

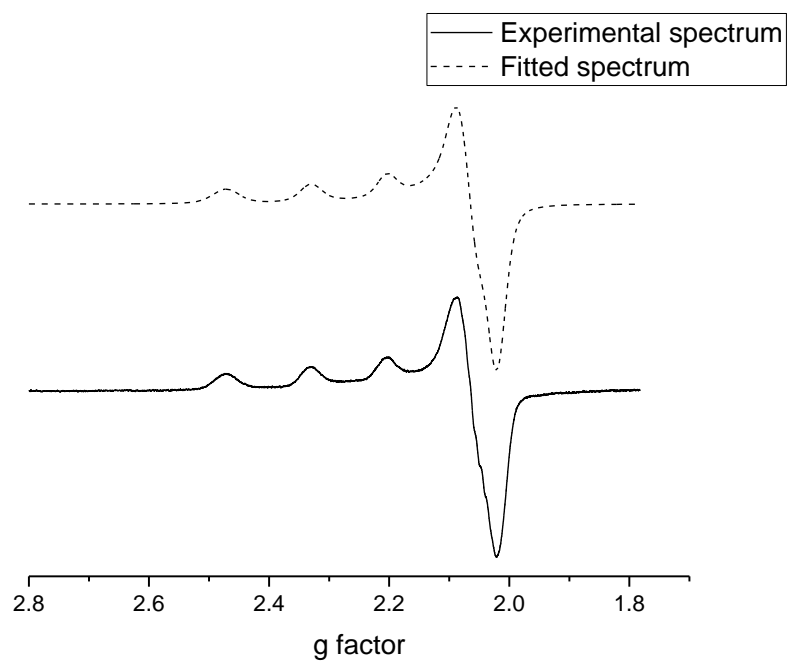

**Figure S9:** X-band (~9.5 GHz) EPR spectrum of **1** recorded at 100 K in methanol.

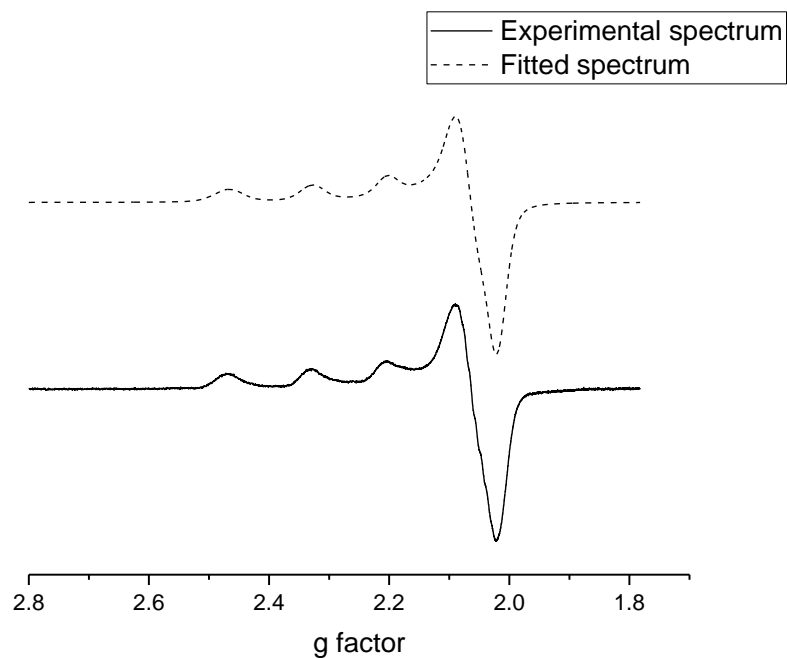

**Figure S10:** X-band (~9.5 GHz) EPR spectrum of **2** recorded at 100 K in methanol.

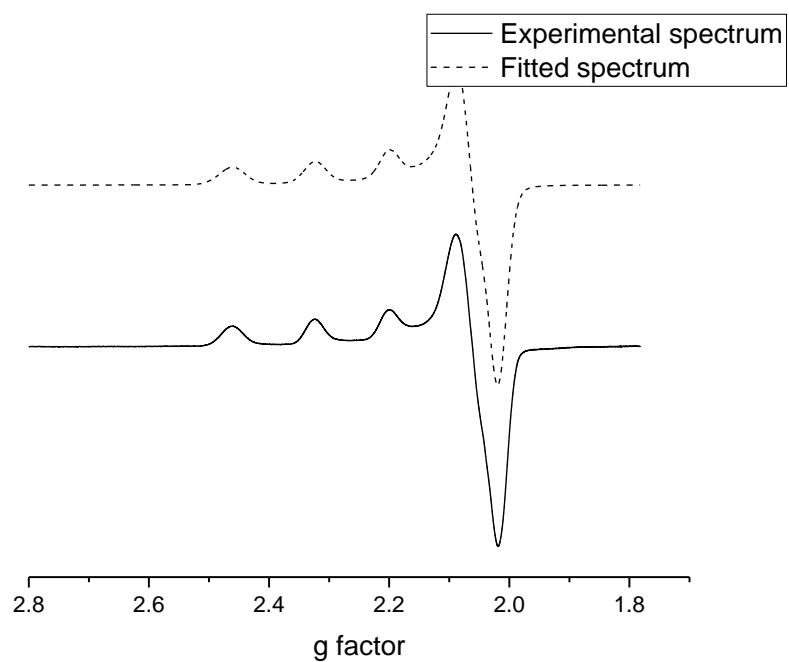

**Figure S11:** X-band (~9.5 GHz) EPR spectrum of **3** recorded at 100 K in methanol.

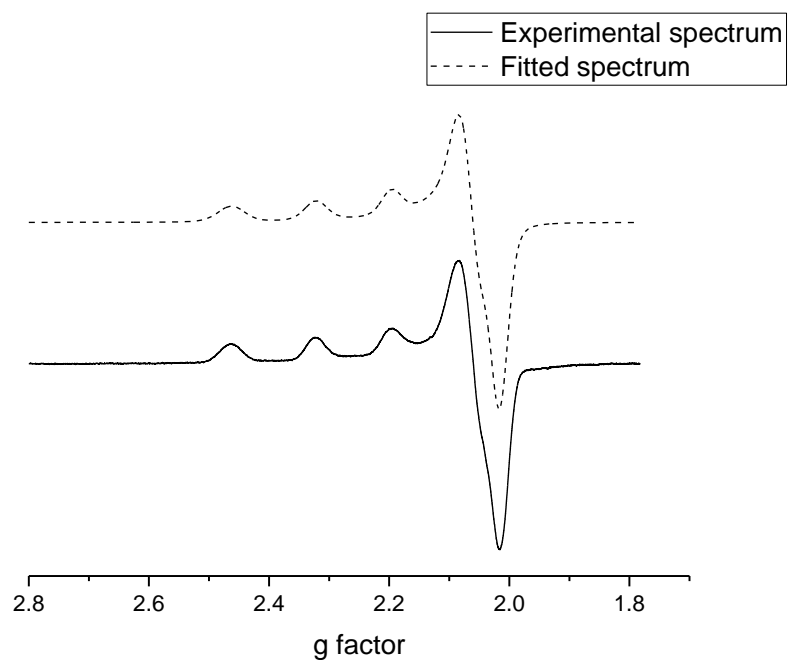

**Figure S12:** X-band (~9.5 GHz) EPR spectrum of **4** recorded at 100 K in methanol.



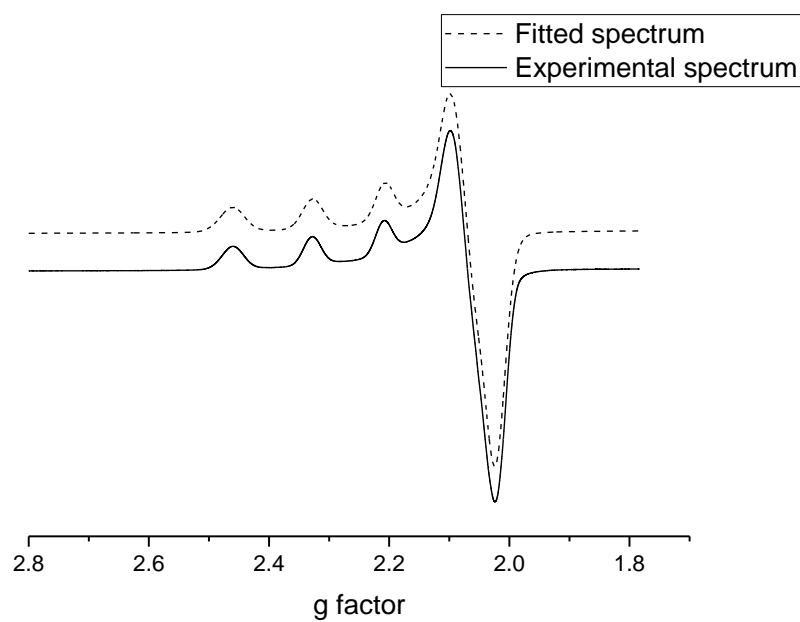

**Figure S13:** X-band (~9.5 GHz) EPR spectrum of **5** recorded at 100 K in methanol.

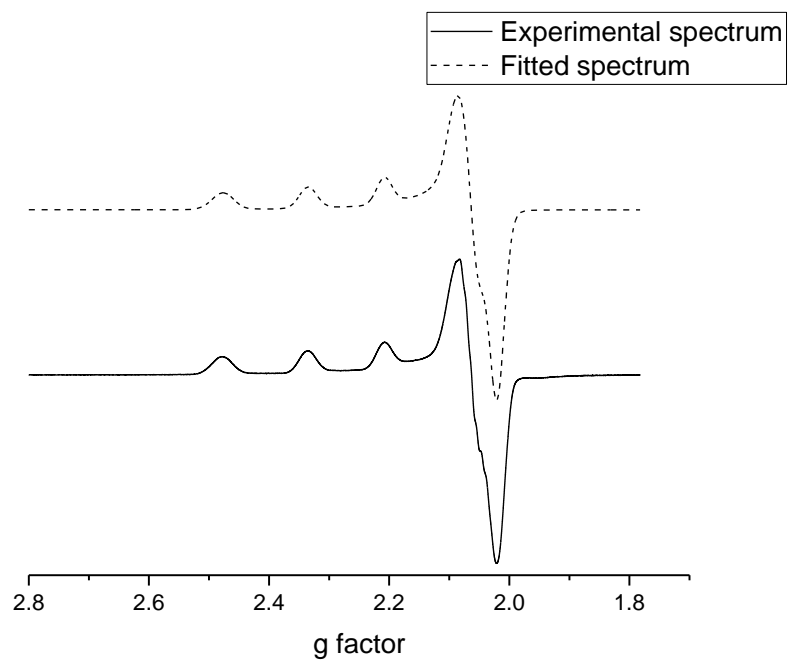

**Figure S14:** X-band (~9.5 GHz) EPR spectrum of **6** recorded at 100 K in methanol.

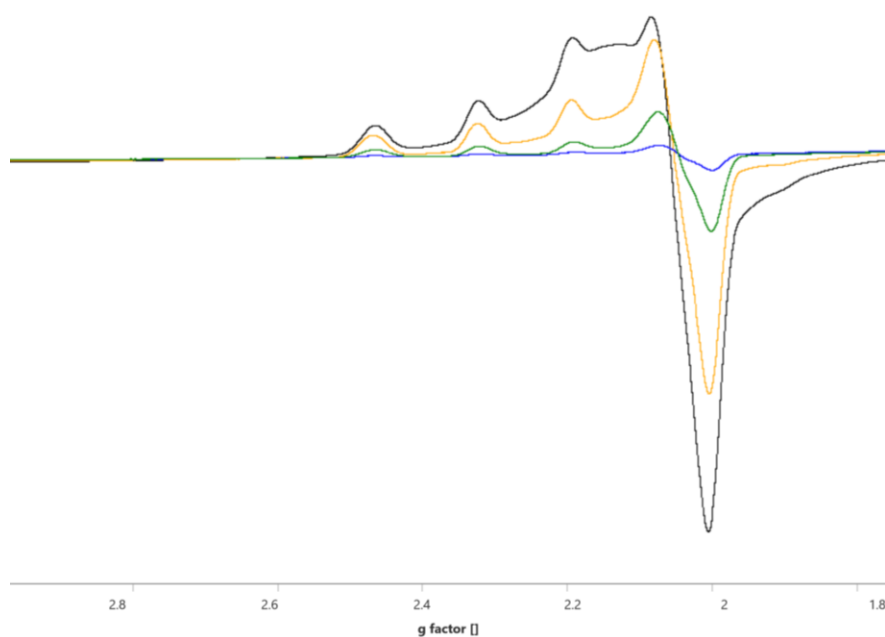

**Figure S15:** X-band ( $\sim 9.5$  GHz) EPR spectrum of **3** recorded at 100 K in methanol at different concentrations: (black)  $C \approx 5 \cdot 10^{-2}$  M ; (yellow)  $C \approx 1 \cdot 10^{-2}$  M ; (green)  $C \approx 5 \cdot 10^{-3}$  M ; (blue)  $C \approx 1 \cdot 10^{-3}$  M.

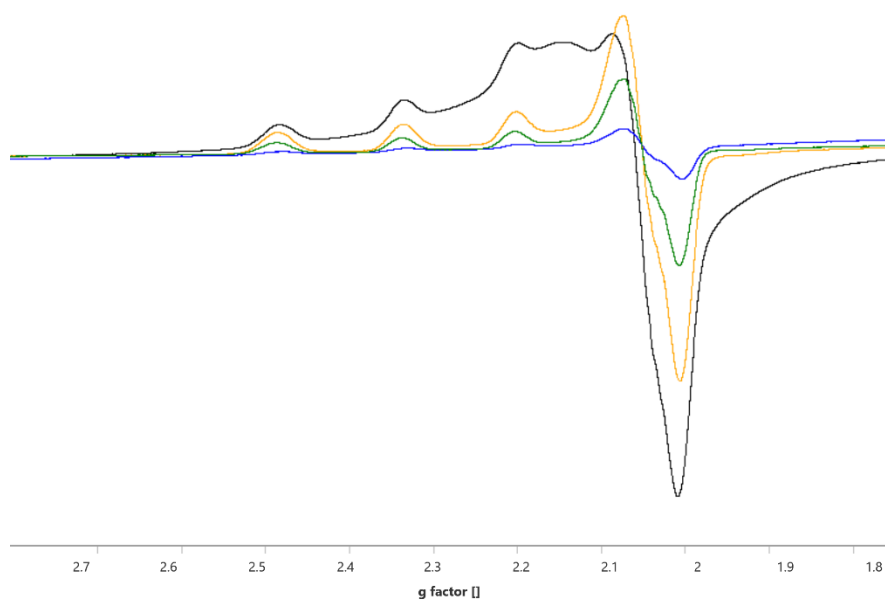

**Figure S16:** X-band ( $\sim 9.5$  GHz) EPR spectrum of **6** recorded at 100 K in methanol at different concentrations: (black)  $C \approx 5 \cdot 10^{-2}$  M ; (yellow)  $C \approx 1 \cdot 10^{-2}$  M ; (green)  $C \approx 5 \cdot 10^{-3}$  M ; (blue)  $C \approx 1 \cdot 10^{-3}$  M.

**Table S9:** Quantification of the spin concentration by EPR spectroscopy in frozen methanolic solutions and comparison with the molar concentration. Error estimated at  $\pm 15$  %.

| Compound<br>(in MeOH) | Spin C<br>(M) | Molar C<br>(M) | C ratio<br>(Spin C/Molar C) |
|-----------------------|---------------|----------------|-----------------------------|
| <b>1</b>              | 0.00175       | 0.00201        | 0.87                        |
| <b>2</b>              | 0.00196       | 0.00200        | 0.98                        |
| <b>3</b>              | 0.02315       | 0.01989        | 1.16                        |
| <b>4</b>              | 0.00213       | 0.00202        | 1.05                        |
| <b>5</b>              | 0.00237       | 0.00199        | 1.19                        |
| <b>6</b>              | 0.00533       | 0.00499        | 1.07                        |

## 5) UV-visible spectra

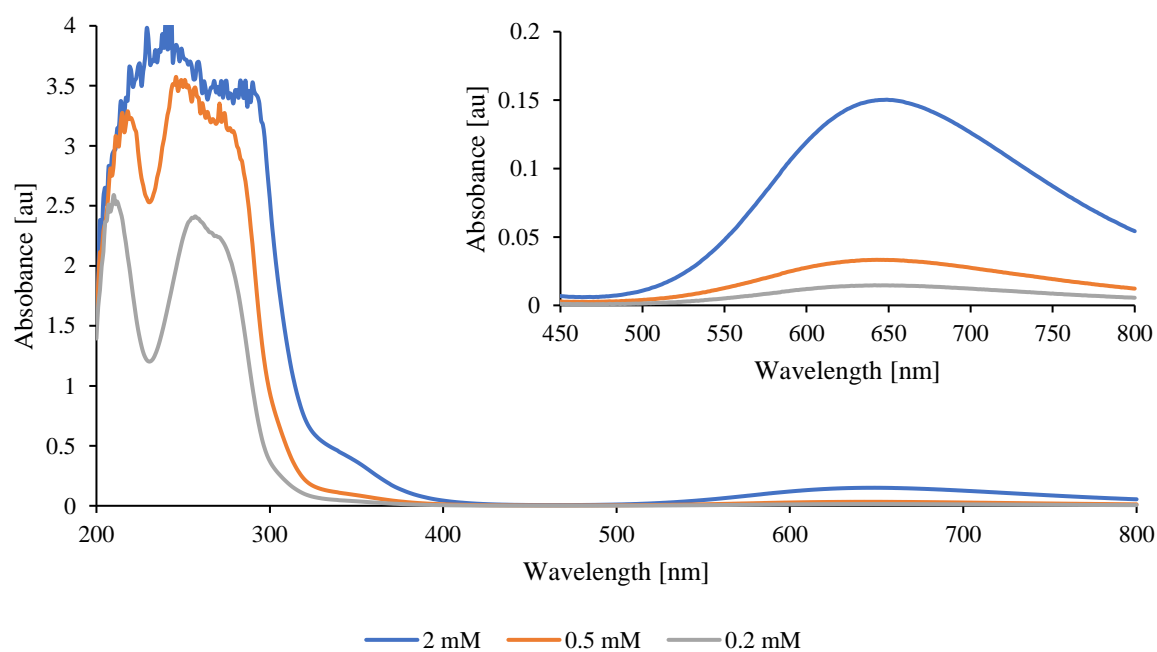

**Figure S17:** UV spectra of **1** at various concentrations in water.

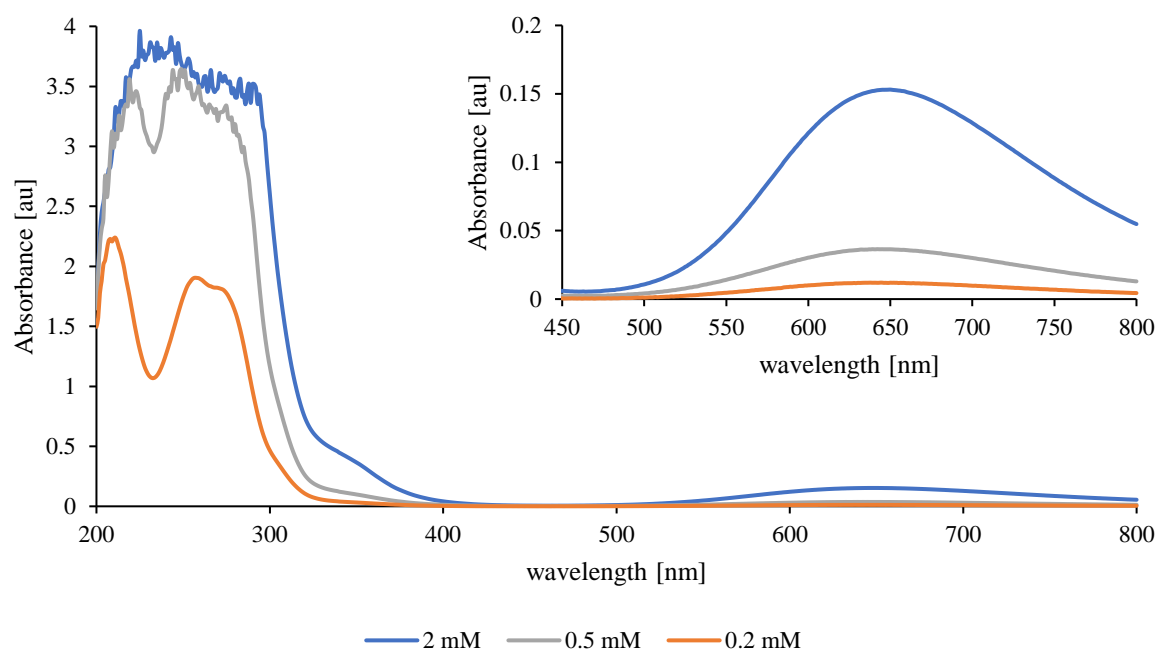

**Figure S18:** UV spectra of **2** at various concentrations in water.

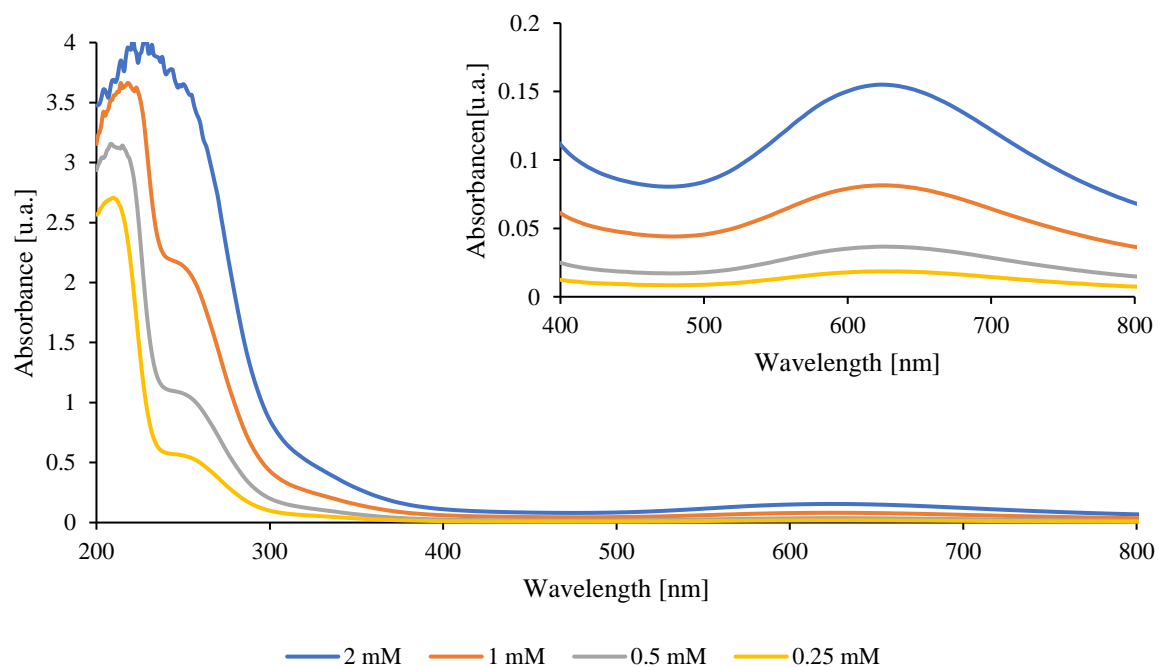

**Figure S19:** UV spectra of **3** at various concentrations in water.

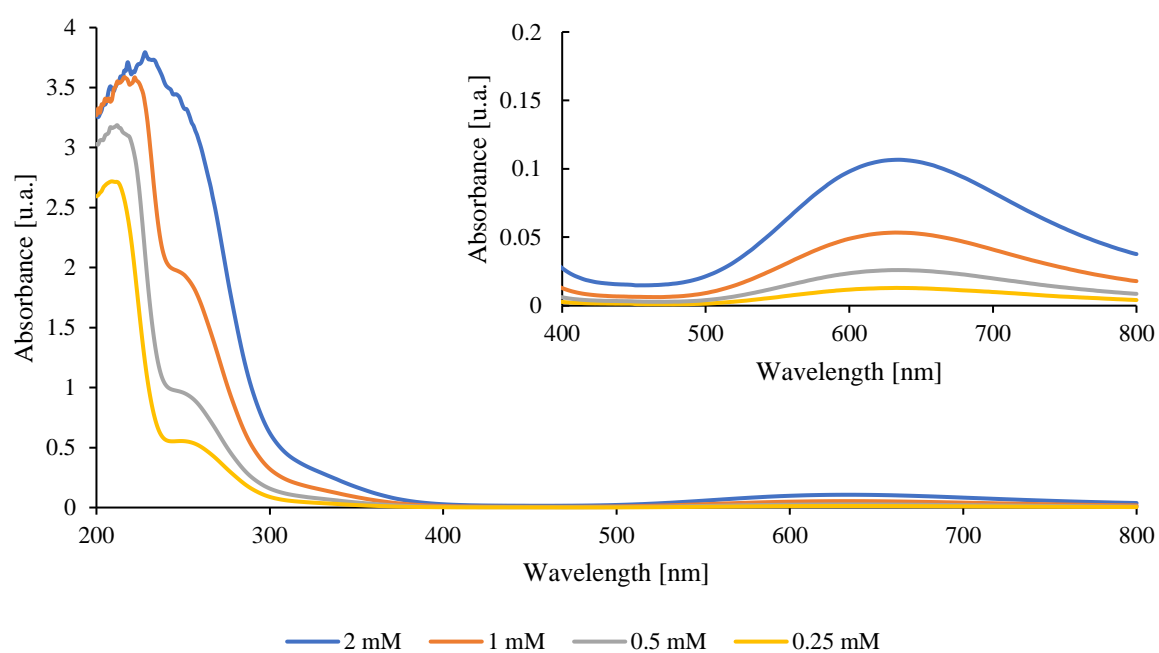

**Figure S20:** UV spectra of **4** at various concentrations in water.

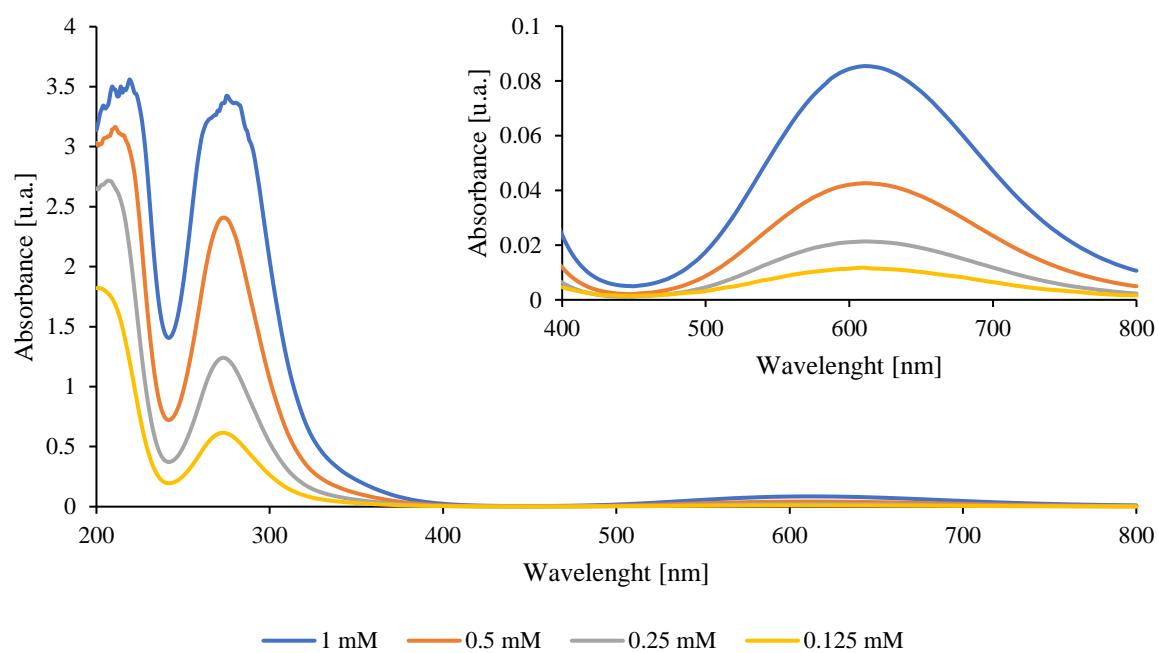

**Figure S21:** UV spectra of **4** at various concentrations in acetonitrile.

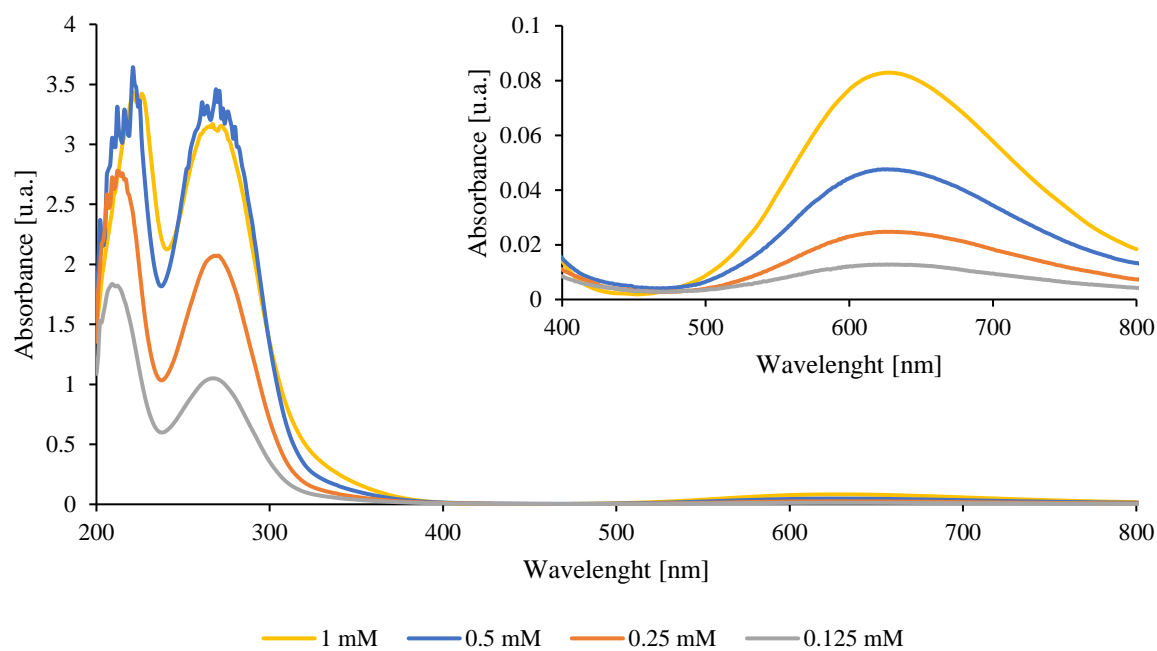

**Figure S22:** UV spectra of **4** at various concentrations in methanol.

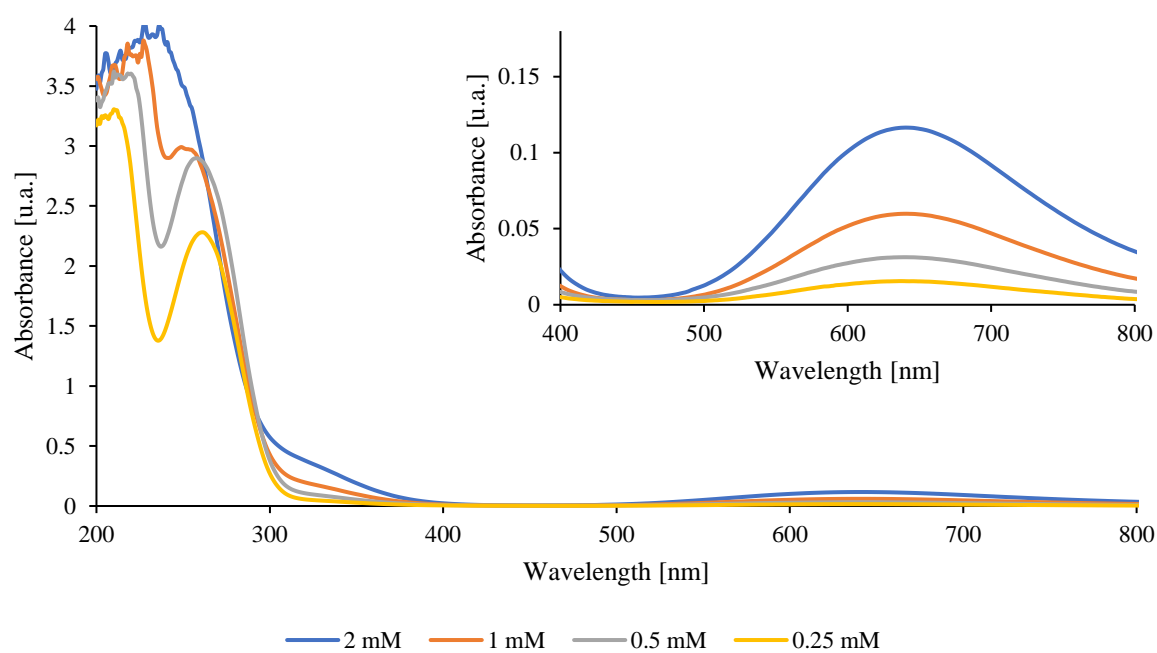

**Figure S23:** UV spectra of **5** at various concentrations in water.

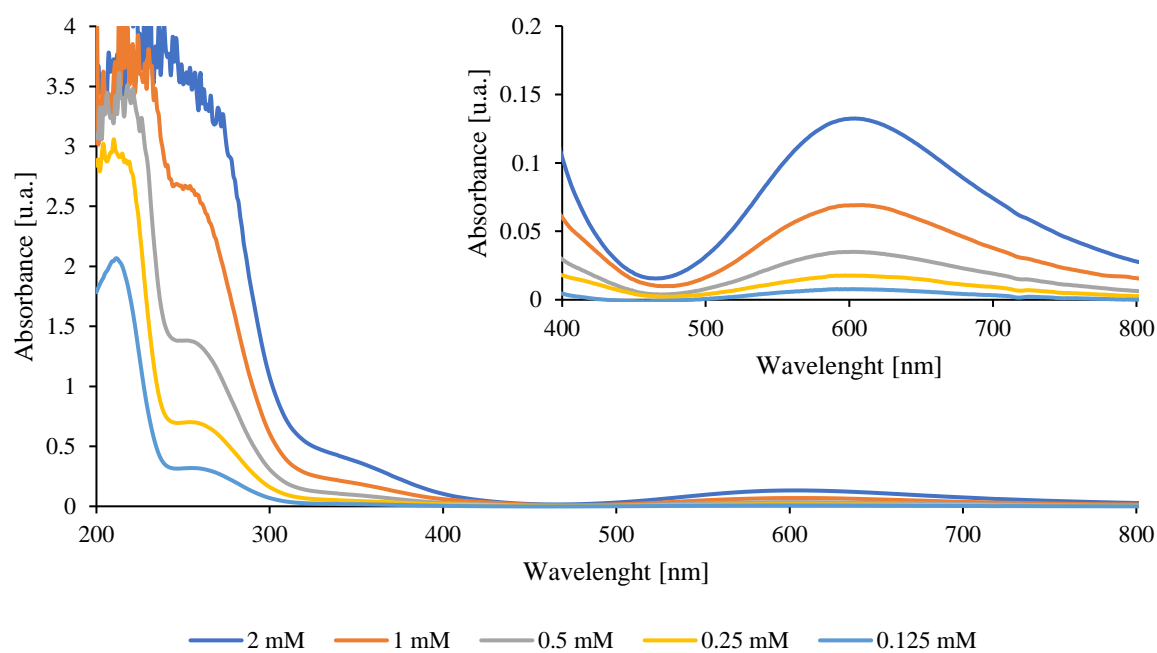

**Figure S24:** UV spectra of **5** at various concentrations in acetonitrile.

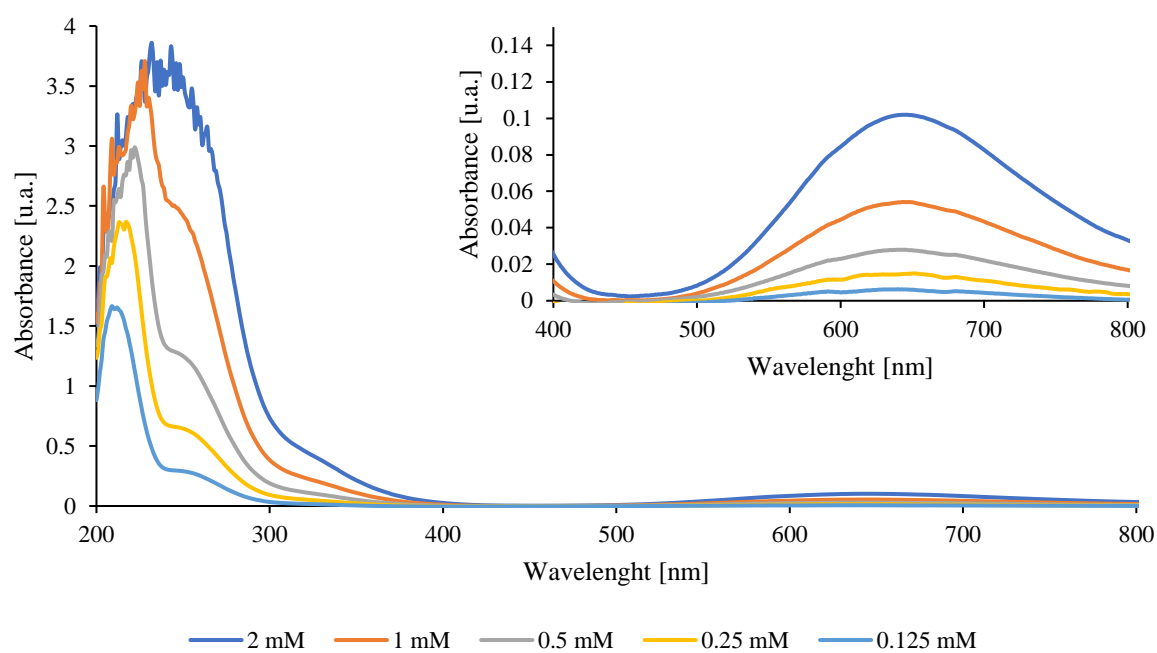

**Figure S25:** UV spectra of **5** at various concentrations in methanol.

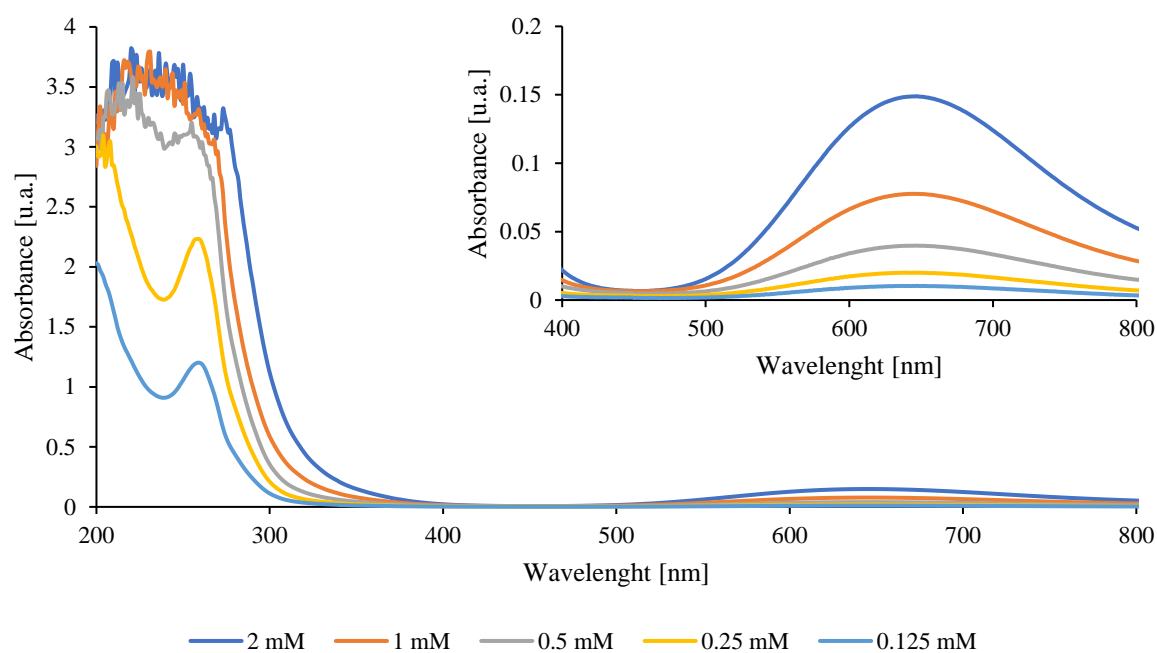

**Figure S26:** UV spectra of **6** at various concentrations in water.

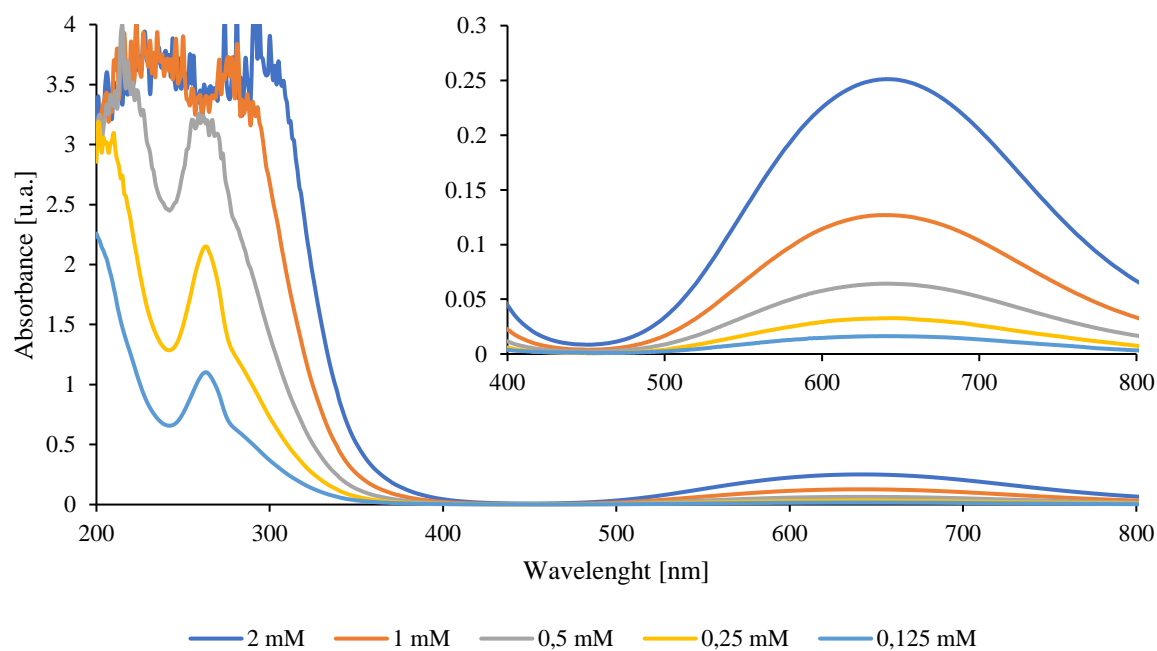

**Figure S27:** UV spectra of **6** at various concentrations in acetonitrile.



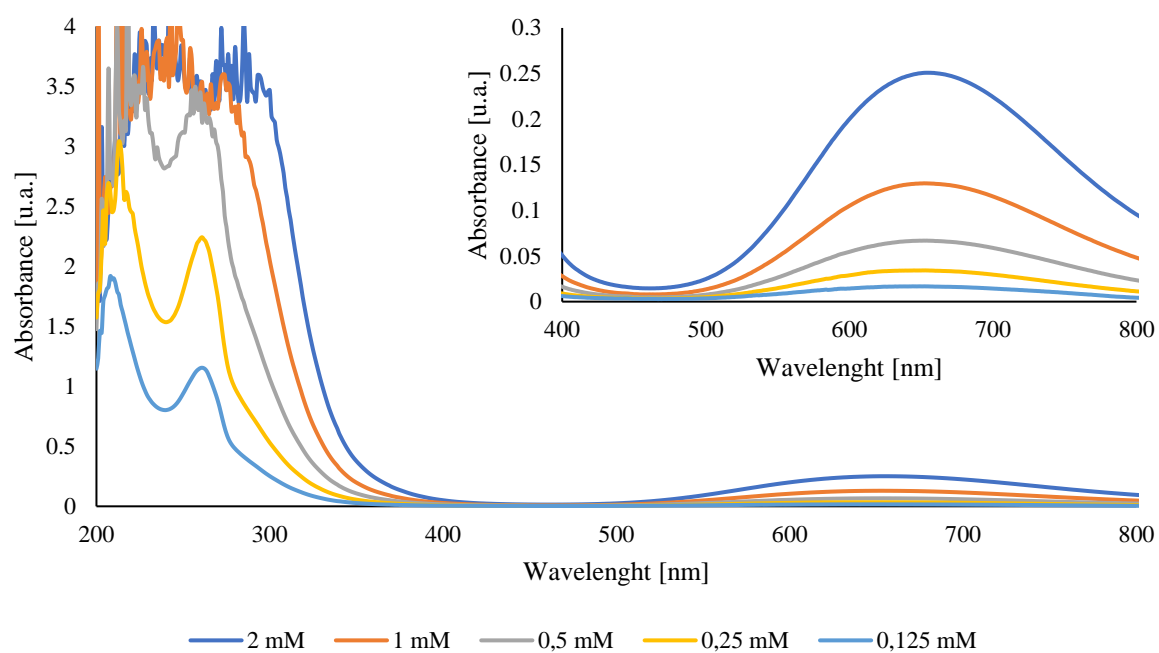

**Figure S28:** UV spectra of **6** at various concentrations in methanol.

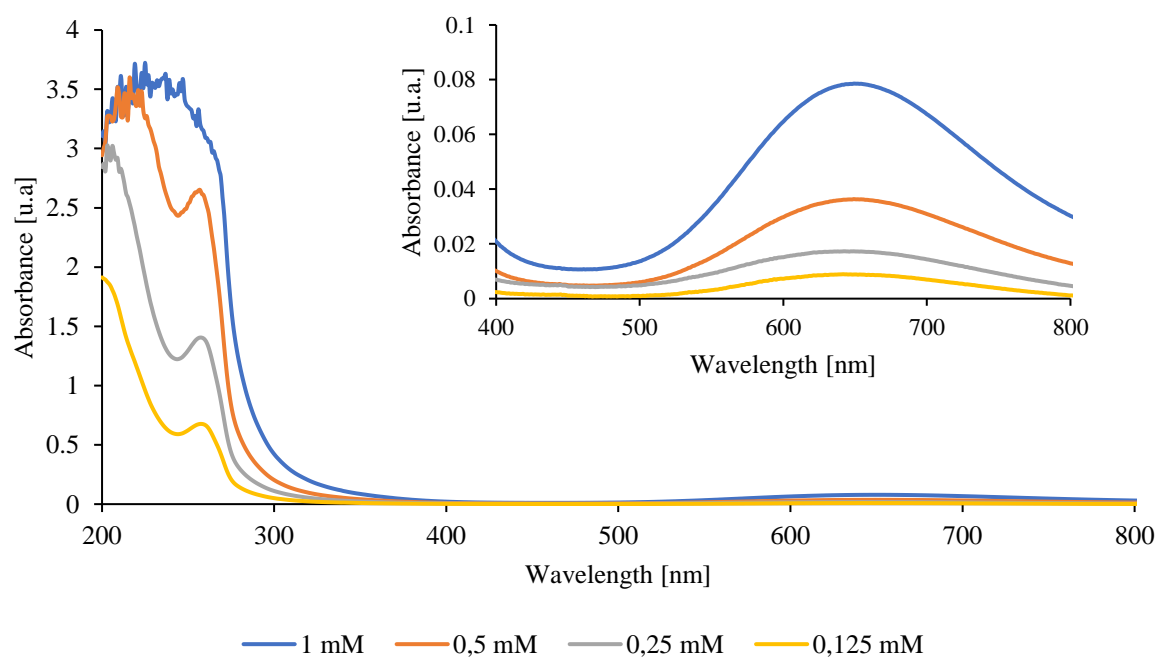

**Figure S29:** UV spectra of **7** at various concentrations in water.

## 6) Cyclic voltammetry

The experiments were carried out in a 10 mL three electrode glass cell with a glassy carbon working electrode ( $d = 3$  mm), a platinum wire counter electrode, and a  $\text{Ag}^+/\text{Ag}$  pseudo reference electrode. Unless otherwise stated, voltammograms were recorded in methanol with 0.1 M tetrabutylammonium perchlorate under an argon atmosphere, at room temperature and at a scan rate of 100 mV/s. Ferrocene was used as an internal standard.

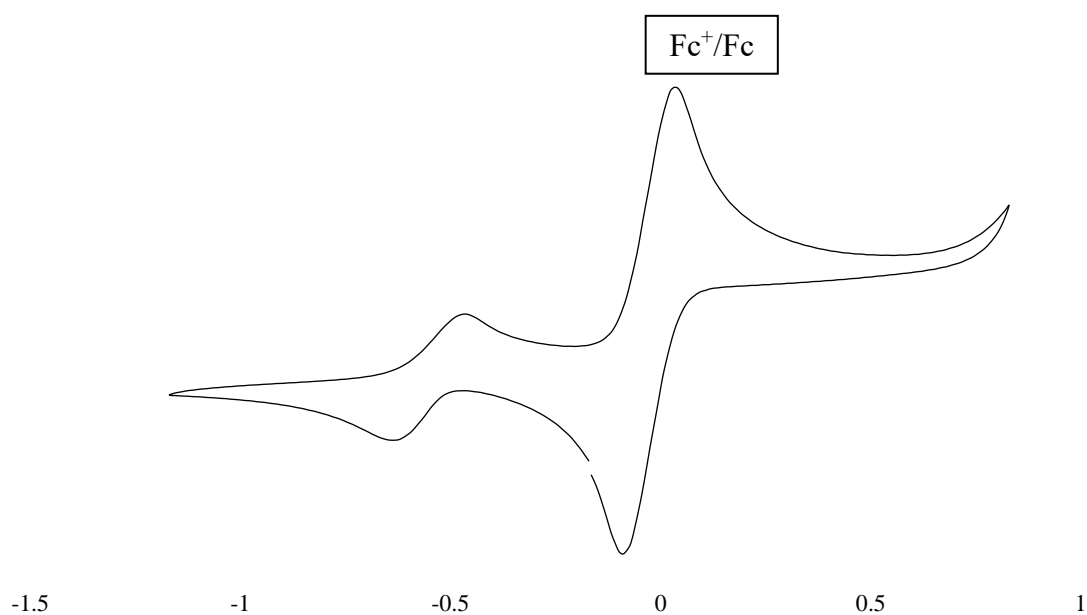

**Figure S30:** Cyclic voltammogram of **1** (1 mM in 100 mM TBAP/methanol, scan rate: 100mV/s).

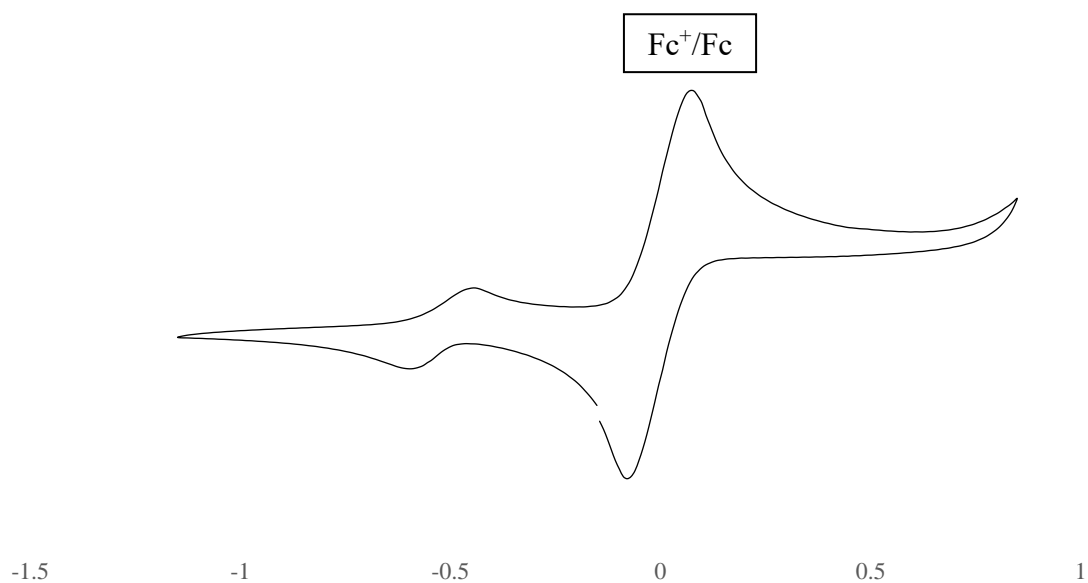

**Figure S31:** Cyclic voltammogram of **2** (1 mM in 100 mM TBAP/methanol, scan rate: 100mV/s).

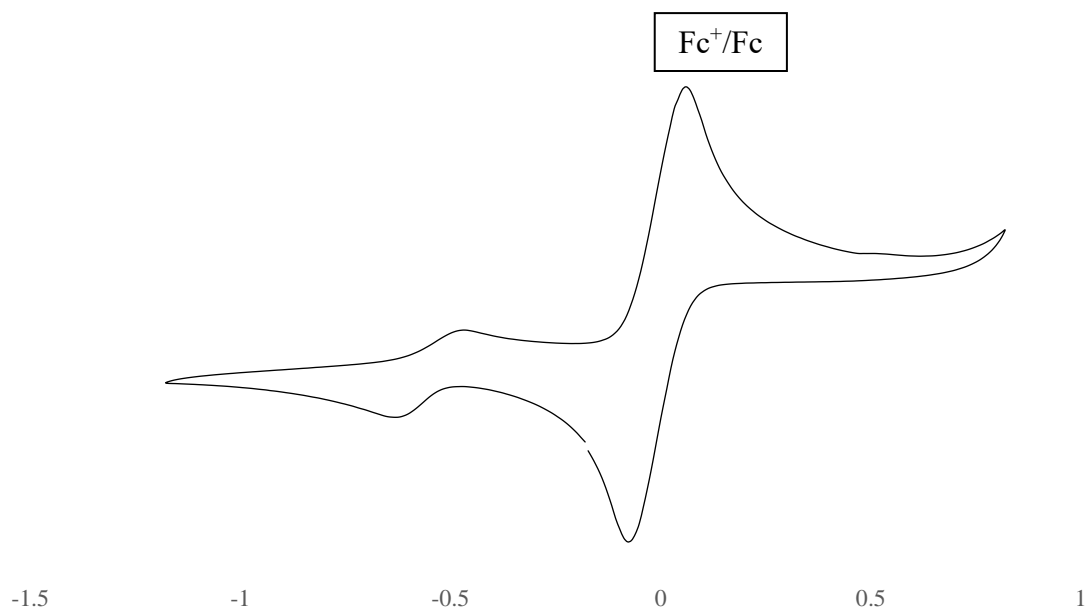

**Figure S32:** Cyclic voltammogram of **3** (1 mM in 100 mM TBAP/methanol, scan rate: 100mV/s).

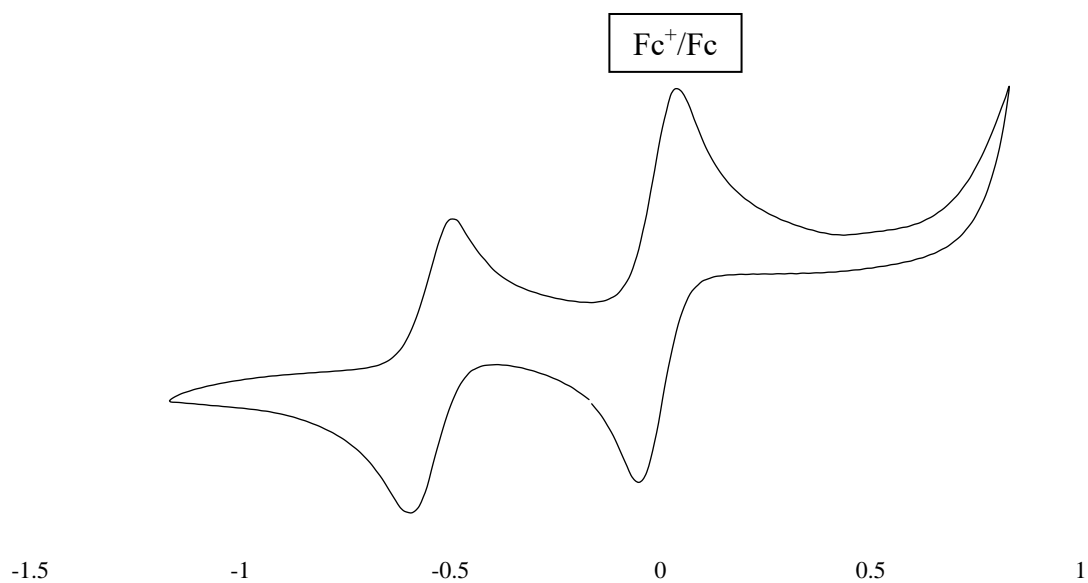

**Figure S33:** Cyclic voltammogram of **4** (1 mM in 100 mM TBAP/methanol, scan rate: 100mV/s).

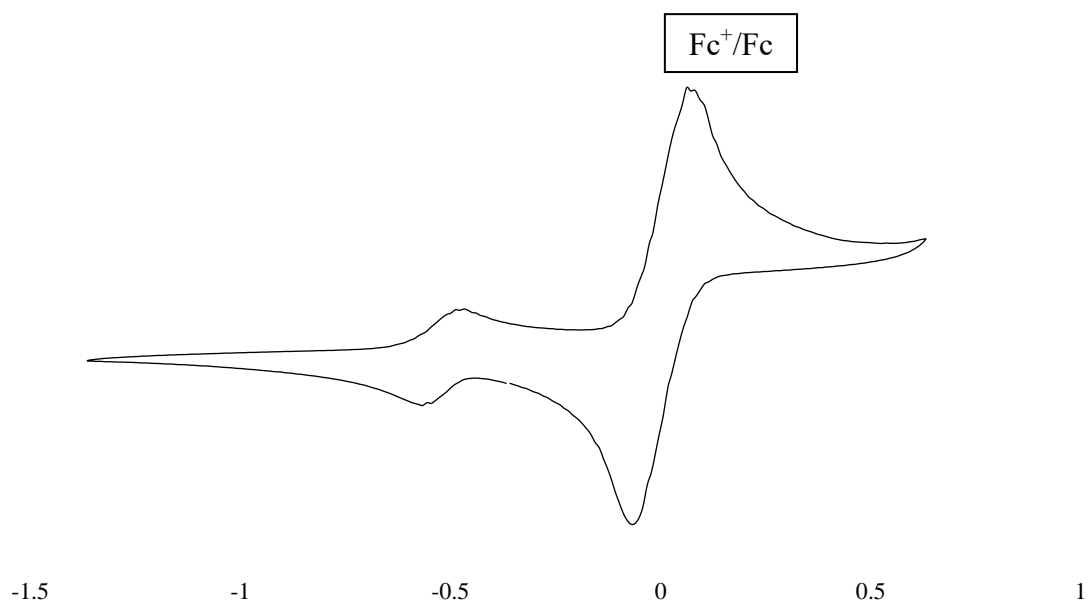

**Figure S34:** Cyclic voltammogram of **5** (1 mM in 100 mM TBAP/methanol, scan rate: 100mV/s).

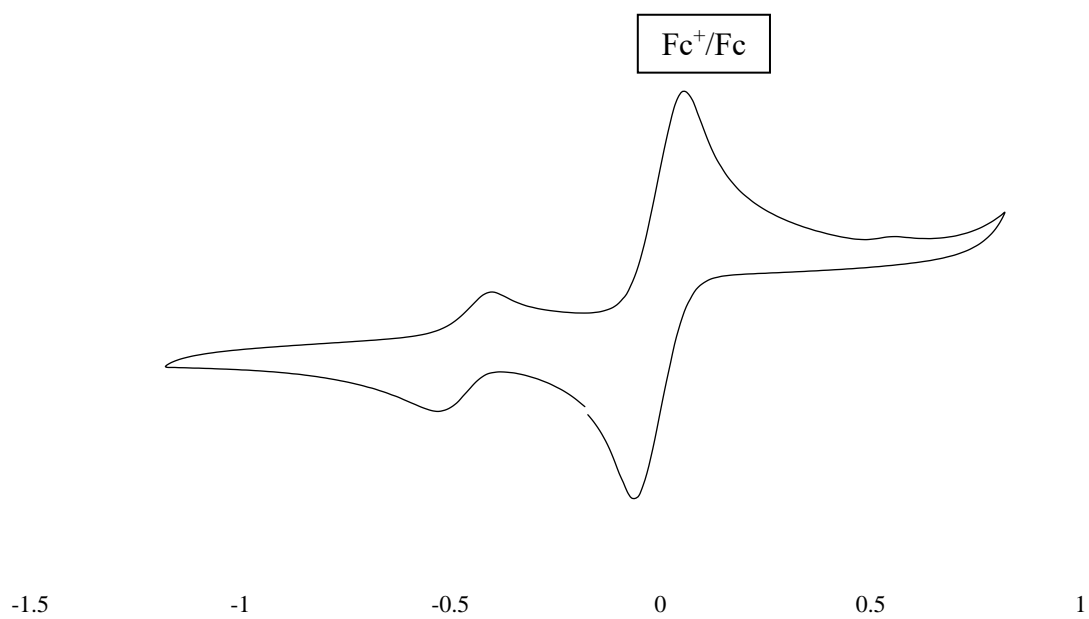

**Figure S35:** Cyclic voltammogram of **6** (1 mM in 100 mM TBAP/methanol, scan rate: 100mV/s).

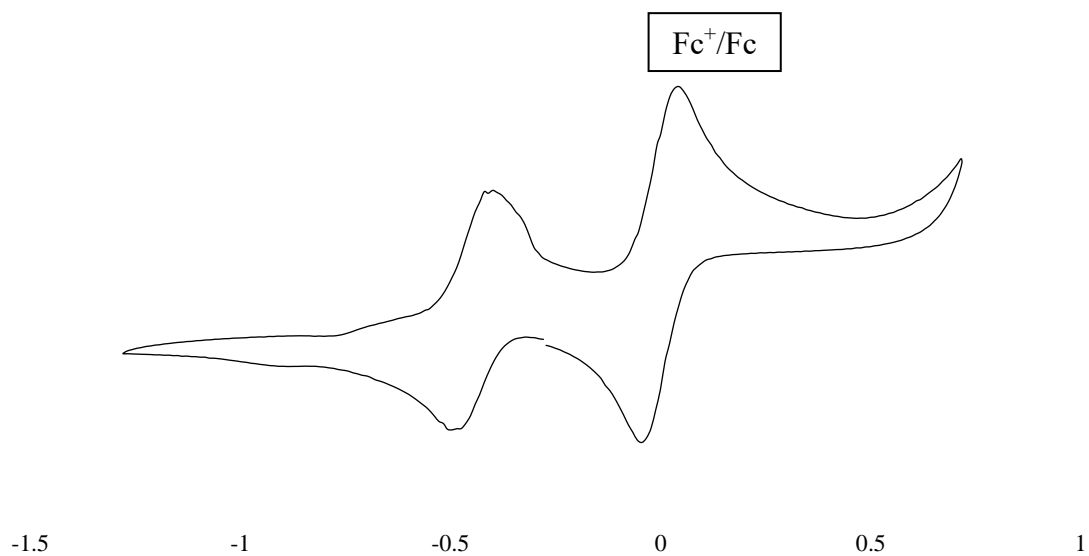

**Figure S36:** Cyclic voltammogram of **7** (1 mM in 100 mM TBAP/methanol, scan rate: 100mV/s).

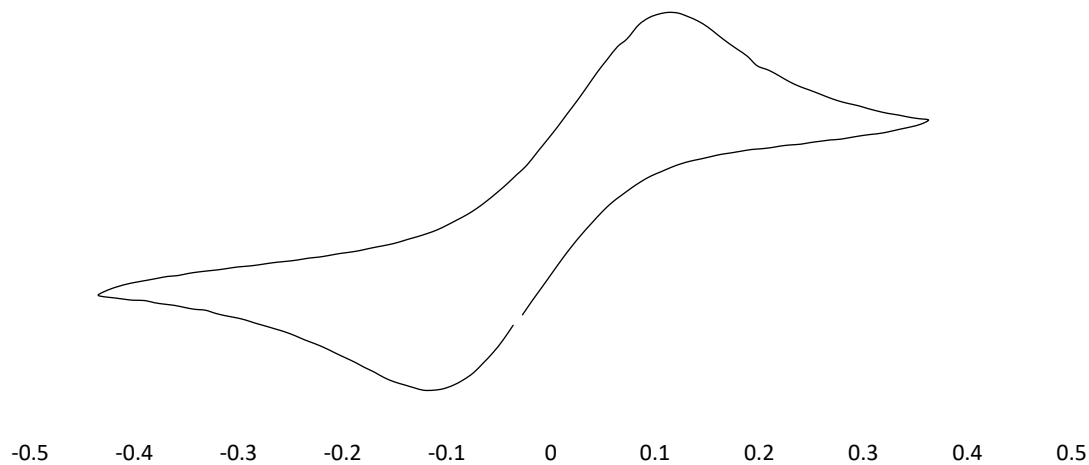

**Figure S37:** Cyclic voltammogram of **CuCl<sub>2</sub>** (1 mM in 100 mM TBAP/methanol, scan rate: 100mV/s). The  $\text{Cu}^{\text{II}}/\text{Cu}^{\text{I}}$  reduction overlaps with the  $\text{Fc}^+/\text{Fc}$  reduction.

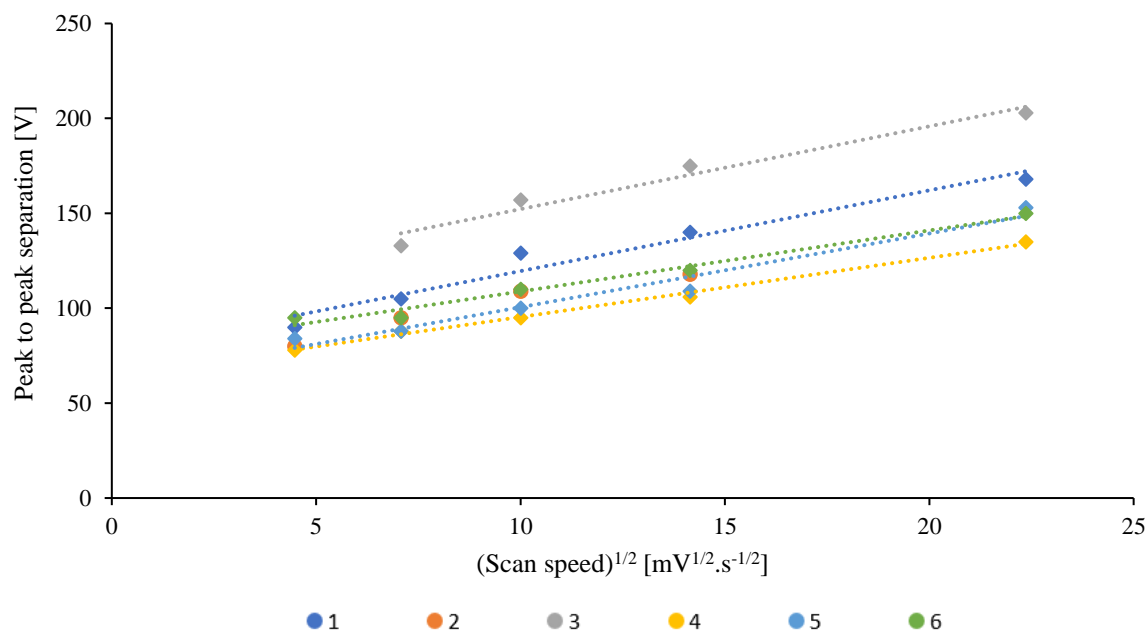

**Figure S38:** Dependence of the peak to peak separation with the square root of the scan rate (1 mM in 100 mM TBAP/methanol).

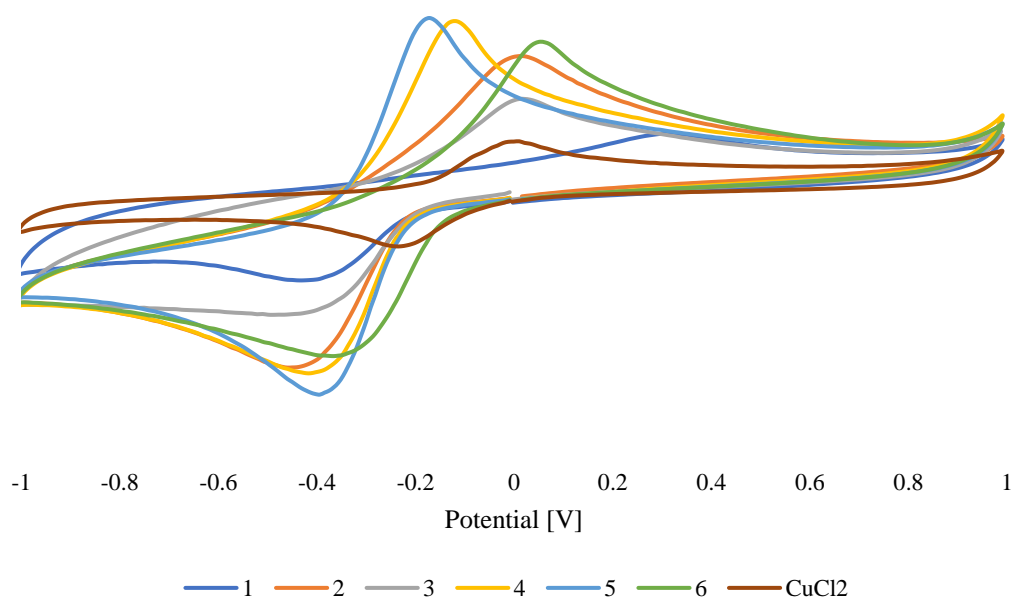

**Figure S39:** Cyclic voltammogram of **1-7** (1 mM in 10 mM pH 7.5 aqueous phosphate buffer, scan rate: 100 mV/s, reference electrode: AgCl/Ag in 3 M KCl).

**Table S10:** Summary of the electrochemical parameters in pH 7.5 aqueous phosphate buffer.

| Compound | $E_{\text{red}}$ [V] | $E_{\text{ox}}$ [V] | $E_{1/2}$ [V] | $\Delta E$ [V] |
|----------|----------------------|---------------------|---------------|----------------|
| 1        | -0.431               | 0.325               | -0.053        | 0.756          |
| 2        | -0.441               | 0.016               | -0.2125       | 0.457          |
| 3        | -0.445               | 0.032               | -0.2065       | 0.477          |
| 4        | -0.413               | -0.116              | -0.2645       | 0.297          |
| 5        | -0.394               | -0.163              | -0.2785       | 0.231          |
| 6        | -0.366               | 0.053               | -0.1565       | 0.419          |

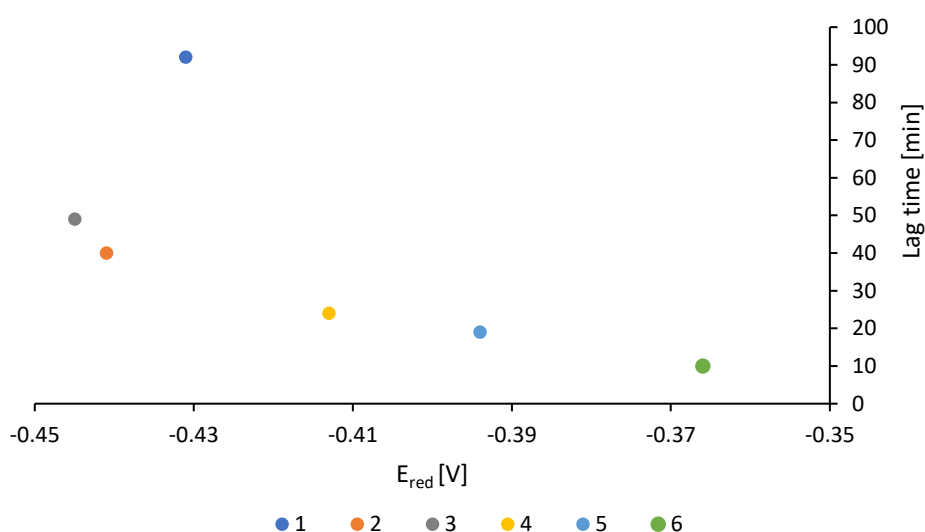

**Figure S40:** Correlation between the reduction potential ( $E_{\text{red}}$ ) of compound 1 - 6 measured in phosphate buffer (pH 7.5) and the lag time obtained from the catalytic assays.

## 7) Catalytic evaluation

### 7.1) Reactivity test of catalytic oxidation cleavage of PNPG

The following solutions were prepared:

- Phosphate buffer (80 mM, pH = 7.5):  $\text{K}_2\text{HPO}_4 \cdot 3\text{H}_2\text{O}$  (15.340 g, 0.0672 mol) and  $\text{NaH}_2\text{PO}_4$  (1.534 g, 0.0128 mol) were dissolved in distilled water to reach 1 L. before each use a volume of this stock solution as diluted 8 times to reach a concentration of 10 mM.
- Catalyst solution (0.1 mM): Each copper compound (2.5  $\mu\text{mol}$ ) was dissolved in the buffer solution to reach 25 mL.

- $\text{H}_2\text{O}_2$  solution (400 mM): The commercial 35% (wt%) hydrogen peroxide aqueous solution was regularly titrated using a known concentration of potassium permanganate in acid conditions. The corresponding volume of peroxide was each time diluted in the buffer solution to reach 2 mL.
- Substrate solution, PNPG (100 mM): PNPG (0.0602 g, 0.2 mmol) was dissolved in the buffer solution to reach 2 mL.

The reactivity tests were performed as follow: a 1 mL UV quartz cuvette was charged, thanks to micropipettes, with 500  $\mu\text{L}$  of the catalyst solution, 100  $\mu\text{L}$  of the PNPG solution, the total volume was brought to 0.9 mL with buffer. The assay was started with the addition of 100  $\mu\text{L}$  of the  $\text{H}_2\text{O}_2$  solution. Reference tests were performed without catalyst in all cases the total volume was brought to 1 mL with buffer. The reaction mixtures were manually stirred prior to each measurement to prevent the formation of gas bubbles in the cuvette. Quantification of the product (4-nitrophenolate) was performed by measuring the absorbance at 400 nm ( $\epsilon = 1.85 \times 10^4 \text{ M}^{-1} \cdot \text{cm}^{-1}$ ) every minute for the first 20 minutes or 2 hours and after 24 h. Note that for the measurement after 24 h, the catalytic solution was diluted 10 times. The assays were performed at room temperature (18  $^\circ\text{C}$  – 25  $^\circ\text{C}$ ) protected from light.

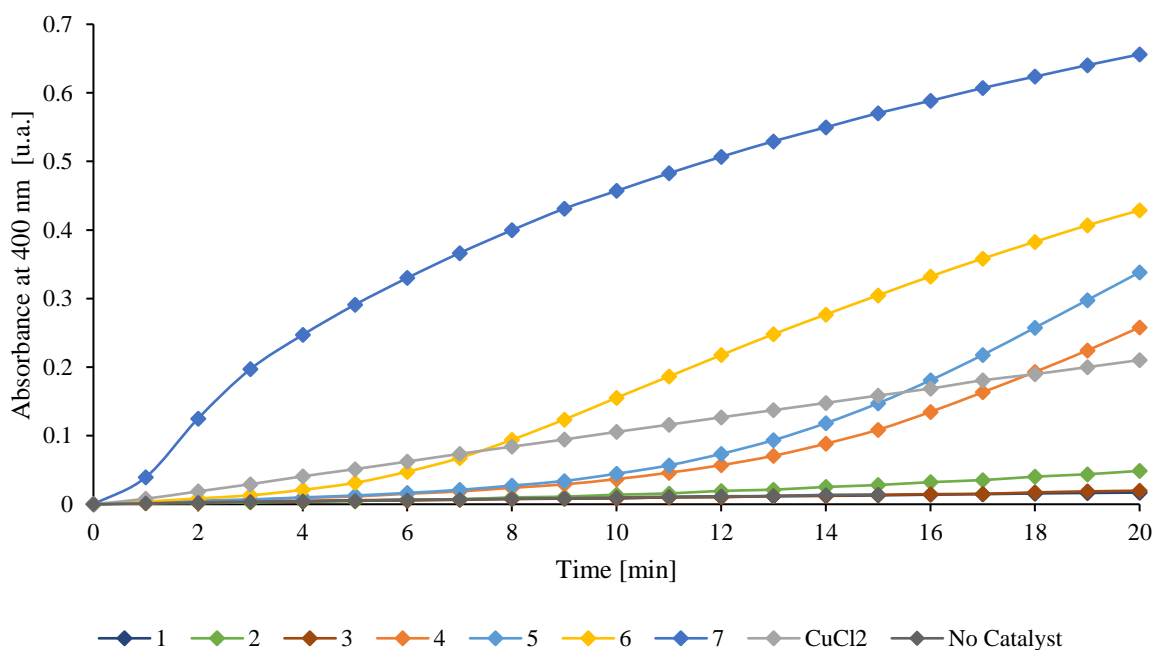

**Figure S41:** Evolution of the absorbance of paranitrophenolate at 400 nm as a function of time over 20 minutes. Conditions: 10 mM phosphate buffer pH 7.5; [catalyst]= 50  $\mu\text{M}$ ; [PNPG]= 10 mM and [ $\text{H}_2\text{O}_2$ ]= 40 mM, temperature = r.t.



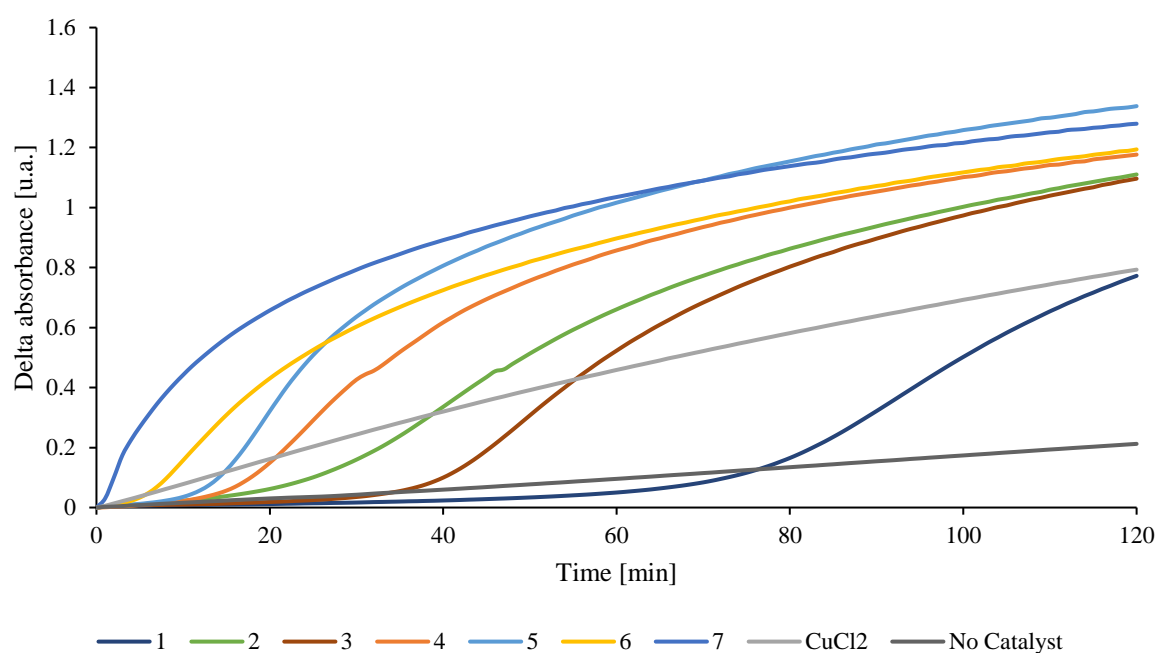

**Figure S42:** Evolution of the absorbance of paranitrophenolate at 400 nm as a function of time over 2 hours. Conditions: 10 mM phosphate buffer pH 7.5; [catalyst]= 50  $\mu$ M; [PNPG]= 10 mM and [H<sub>2</sub>O<sub>2</sub>]= 40 mM, temperature = r.t.

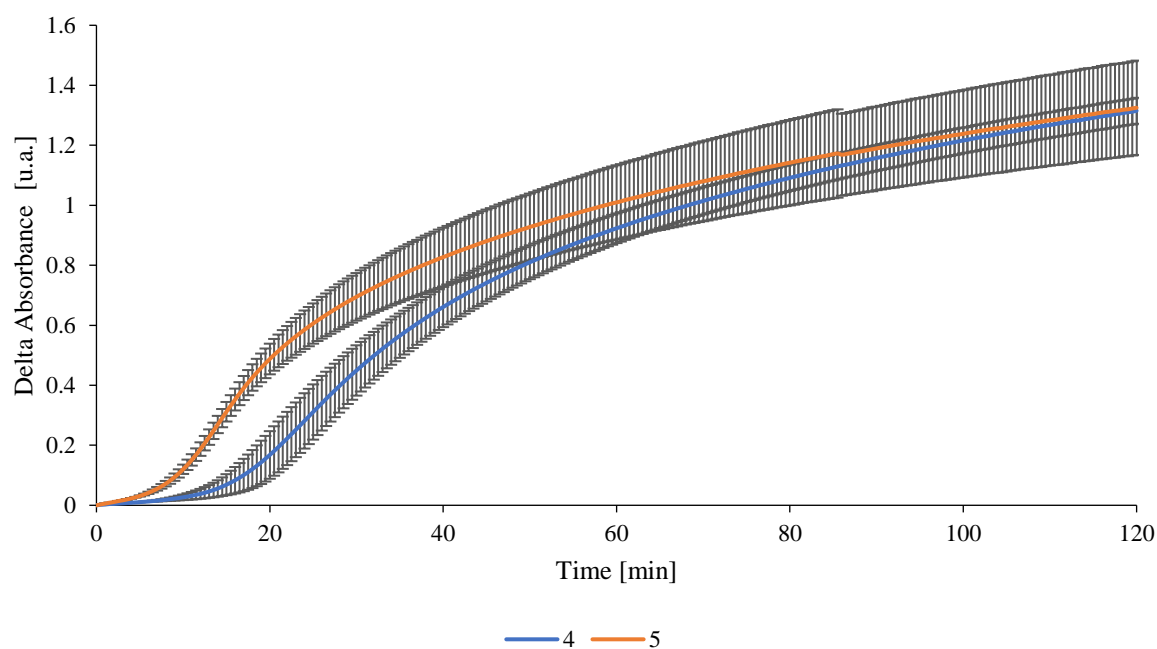

**Figure S43:** Mean of the evolution of the absorbance of paranitrophenolate at 400 nm as a function of time over 2 hours for compound 4 (blue) and 5 (orange) over three separate runs with standard deviations (grey). Conditions: 10 mM phosphate buffer pH 7.5; [catalyst]= 50  $\mu$ M; [PNPG]= 10 mM and [H<sub>2</sub>O<sub>2</sub>]= 40 mM, temperature = r.t.

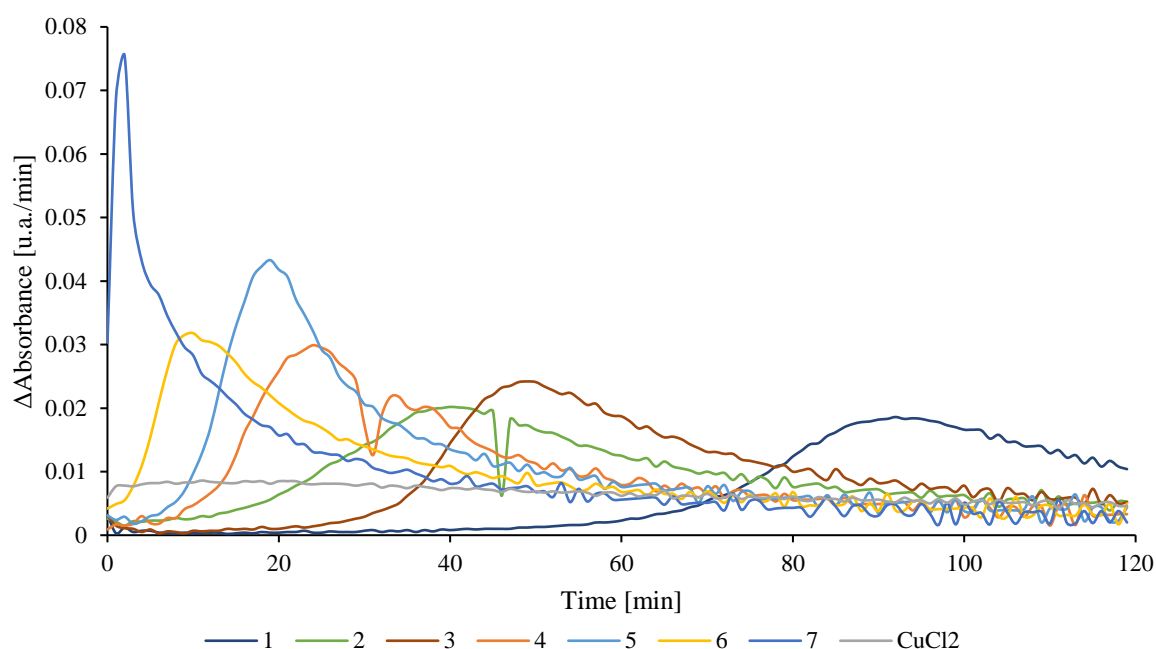

**Figure S44:** First derivative of the absorbance of paranitrophenolate at 400 nm as a function of time over 2 hours. Conditions: 10 mM phosphate buffer pH 7.5; [catalyst]= 50  $\mu$ M; [PNPG]= 10 mM and [H<sub>2</sub>O<sub>2</sub>]= 40 mM, temperature = r.t.

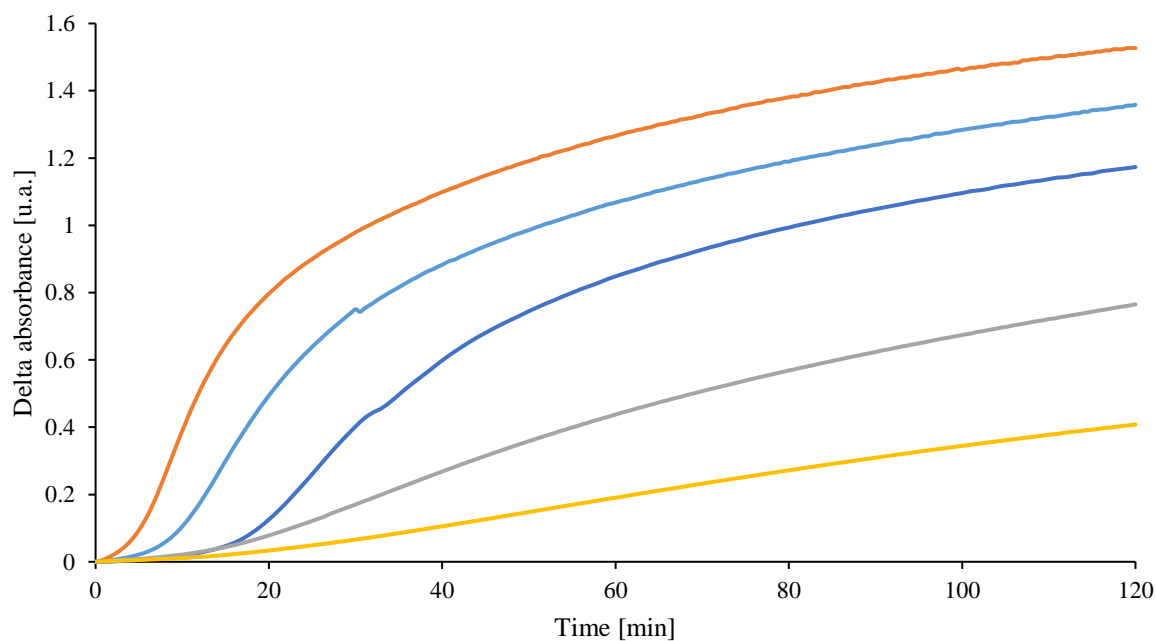

**Figure S45 :** Evolution of the absorbance of paranitrophenolate at 400 nm as a function of time over 2 hours with various concentration of compound 4 or H<sub>2</sub>O<sub>2</sub>. Initial conditions: 10

mM phosphate buffer pH 7.5; [catalyst]= 50  $\mu$ M; [PNPG]= 10 mM and [H<sub>2</sub>O<sub>2</sub>]= 40 mM, temperature = r.t. Light blue: [4]= 100  $\mu$ M, orange: [H<sub>2</sub>O<sub>2</sub>]= 80 mM, grey: [H<sub>2</sub>O<sub>2</sub>]= 40 mM, yellow: [H<sub>2</sub>O<sub>2</sub>]= 20 mM.

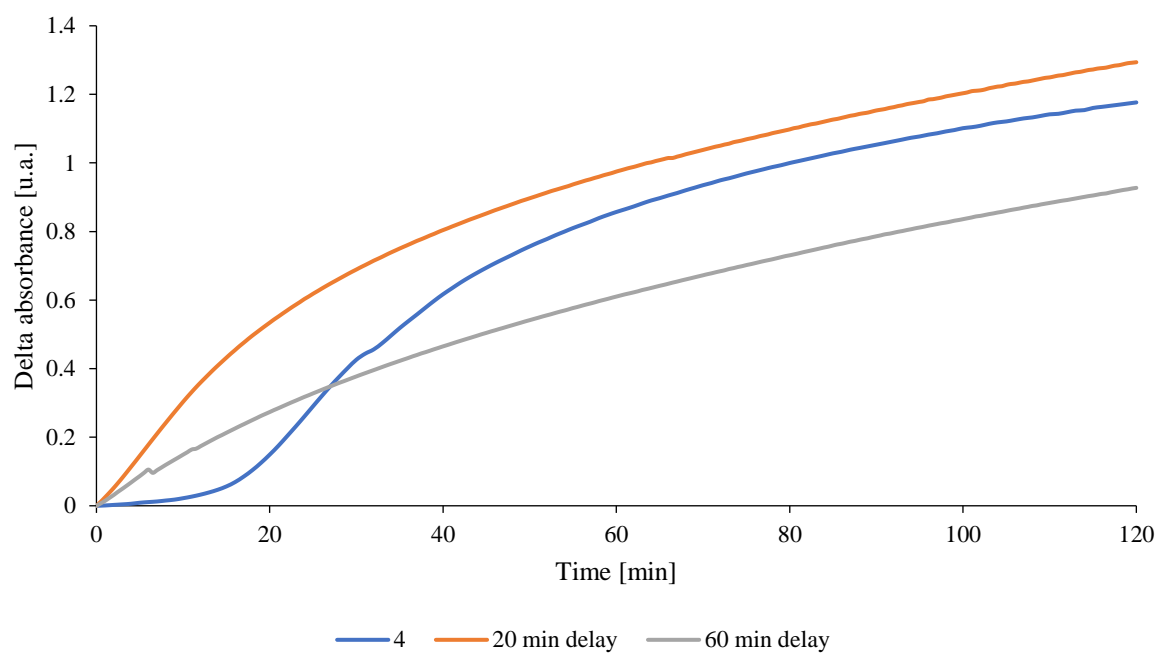

**Figure S46:** Evolution of the absorbance of paranitrophenolate at 400 nm as a function of time over 2 hours. The substrate was added as described in section 7.1 [blue], after a 20-minute [Orange] or a 60-minute [grey] incubation of compound 4 with H<sub>2</sub>O<sub>2</sub>.

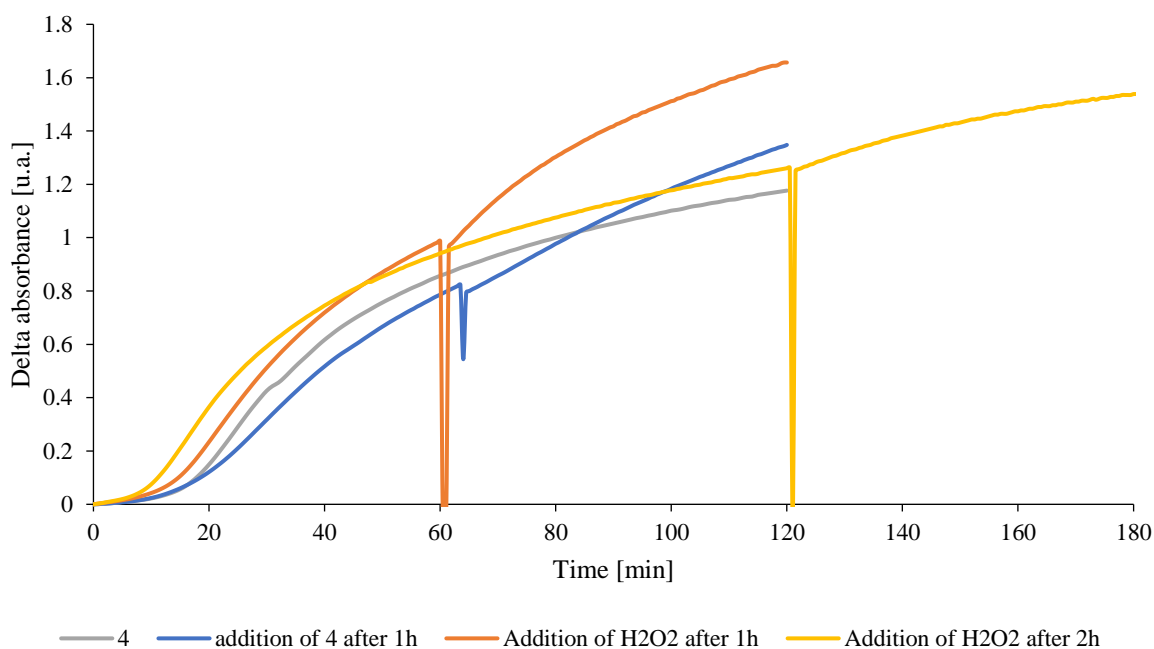

**Figure S47:** Evolution of the absorbance of paranitrophenolate at 400 nm as a function of time over 2 hours. Addition of another equivalent of compound 4 after 1 hour, (Blue) or  $\text{H}_2\text{O}_2$  after 1 hour (Orange) or 2 hours (Yellow). Initial conditions (Grey): 10 mM phosphate buffer pH 7.5; [catalyst]= 50  $\mu\text{M}$ ; [PNPG]= 10 mM and [ $\text{H}_2\text{O}_2$ ]= 40 mM, temperature = r.t. Note: the variations in the first hour between the assays are explained by the accumulation of experimental errors and temperature variations.

## 7.2) Reactivity test of catalytic oxidation cleavage of 4-nitrophenol (PNP)

The following solutions were prepared:

- Phosphate buffer (80 mM, pH = 7.5):  $\text{K}_2\text{HPO}_4 \cdot 3\text{H}_2\text{O}$  (15.340 g, 0.0672 mol) and  $\text{NaH}_2\text{PO}_4$  (1.534 g, 0.0128 mol) were dissolved in distilled water to reach 1 L. before each use a volume of this stock solution as diluted 8 times to reach a concentration of 10 mM.
- Catalyst solution (0.1 mM): Each copper compound (2.5  $\mu\text{mol}$ ) was dissolved in the buffer solution to reach 25 mL.
- $\text{H}_2\text{O}_2$  solution (400 mM): The commercial 35% (wt%) hydrogen peroxide aqueous solution was regularly titrated using a known concentration of potassium permanganate in acid conditions. The corresponding volume of peroxide was each time diluted in the buffer solution to reach 2 mL.
- Substrate solution, PNP (100 mM): PNP (0.010 g) was dissolved in the buffer solution to reach 1 mL.

The reactivity tests were performed as follow: a 1 mL UV quartz cuvette was charged, thanks to micropipettes, with 500  $\mu\text{L}$  of the catalyst solution, 100  $\mu\text{L}$  of the PNP solution, the total volume was brought to 0.9 mL with buffer. The assay was started with the addition of 100  $\mu\text{L}$  of the  $\text{H}_2\text{O}_2$  solution. Reference tests were performed without catalyst or  $\text{H}_2\text{O}_2$  in all cases the total volume was brought to 1 mL with buffer. The reaction mixtures were manually stirred prior to each measurement to prevent the formation of gas bubbles in the cuvette. Quantification of the substrate (4-nitrophenolate) was performed by measuring the absorbance at 400 nm ( $\epsilon = 1.85 \times 10^4 \text{ M}^{-1} \cdot \text{cm}^{-1}$ ) over 2 hours. The assays were performed at room temperature ( $18^\circ\text{C} - 25^\circ\text{C}$ ) protected from light, and using fresh PNP solution for each measurement.

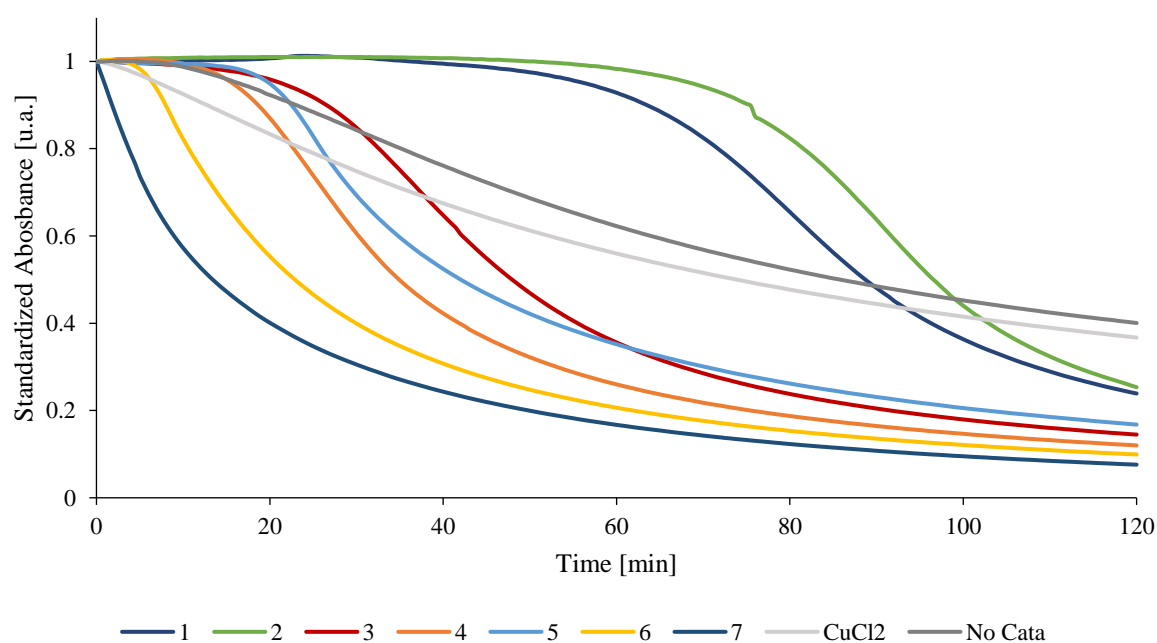

**Figure S48:** Evolution of the absorbance of paranitrophenolate at 400 nm as a function of time over 2 hours. Conditions: 10 mM phosphate buffer pH 7.5; [catalyst]= 50  $\mu\text{M}$ ; [PNP]= 72  $\mu\text{M}$  and [ $\text{H}_2\text{O}_2$ ]= 40 mM, temperature = r.t.

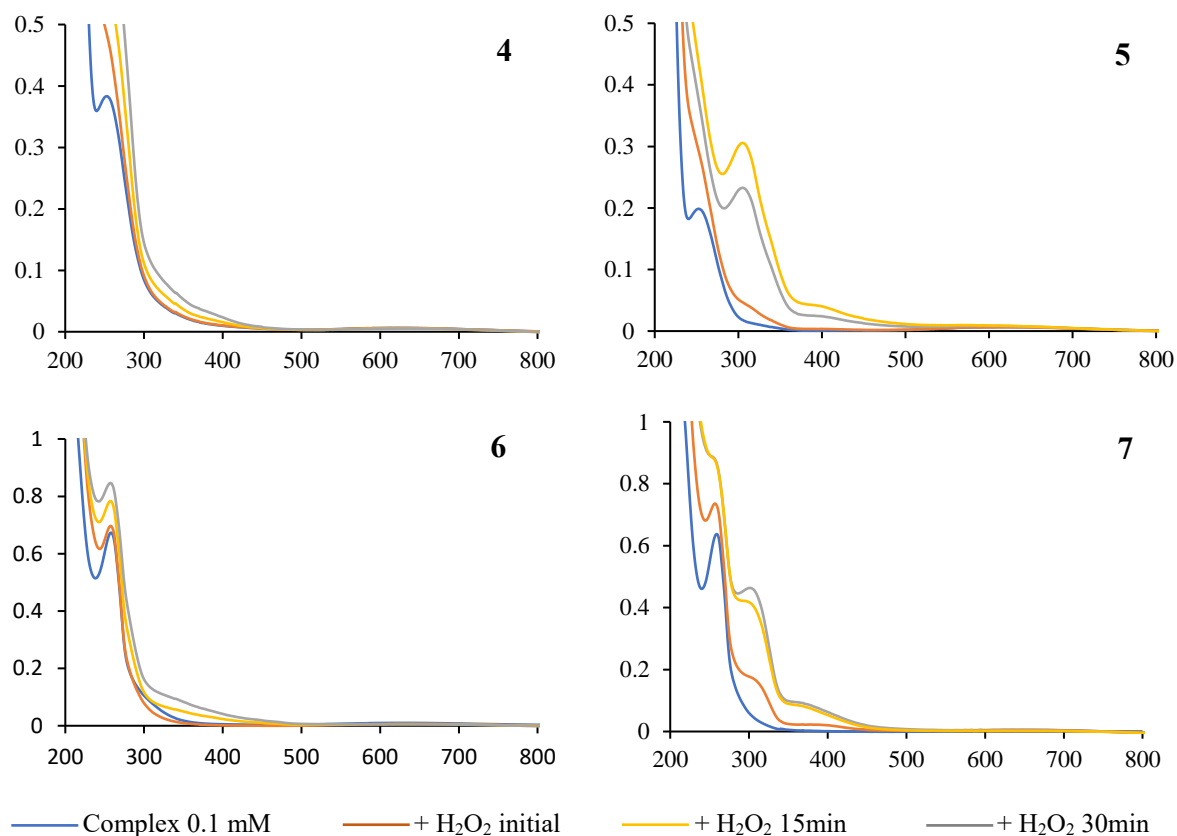

**Figure S49:** Evolution of the absorption spectra of compounds 4 – 7 after addition of 10 equivalents of H<sub>2</sub>O<sub>2</sub>. Conditions: 10 mM phosphate buffer pH 7.5; [Complex]= 0.1 mM; and [H<sub>2</sub>O<sub>2</sub>]= 1 mM, temperature = r.t.

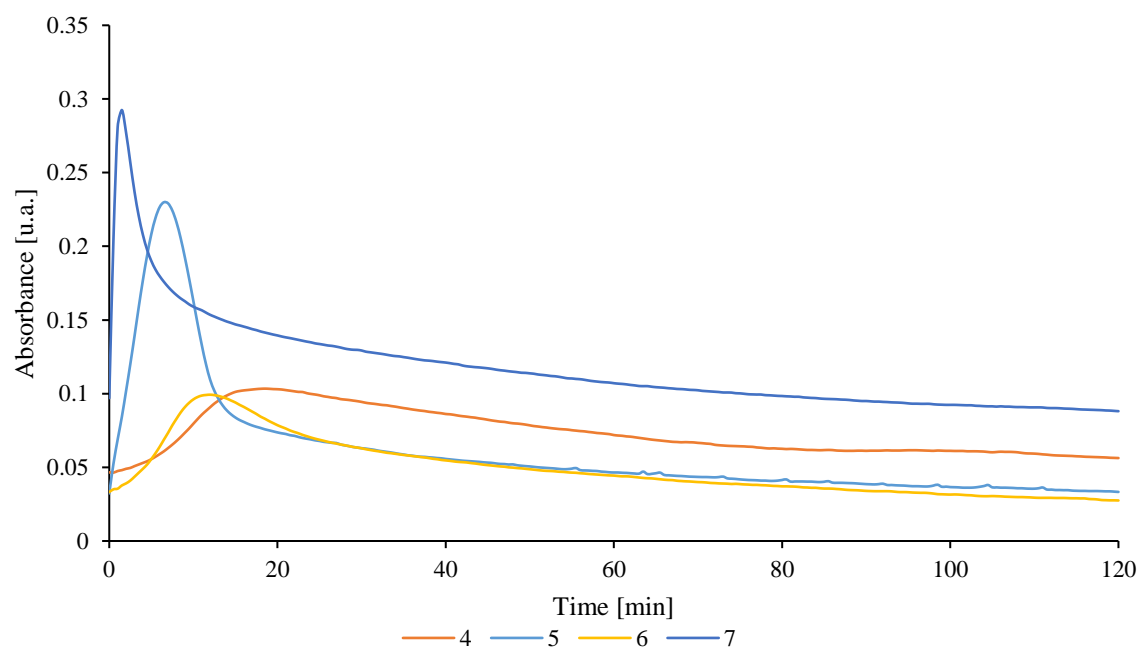

**Figure S50:** Evolution of the absorbance at 305 nm as a function of time over 2 hours of complexes 4 – 7 after addition of 800 equivalents H<sub>2</sub>O<sub>2</sub>.

### 7.3) Radical trap experiments

The following solutions were prepared:

- Phosphate buffer (80 mM, pH = 7.5):  $\text{K}_2\text{HPO}_4 \cdot 3\text{H}_2\text{O}$  (15.340 g, 0.0672 mol) and  $\text{NaH}_2\text{PO}_4$  (1.534 g, 0.0128 mol) were dissolved in distilled water to reach 0.1 L. before each use a volume of this stock solution as diluted 8 times to reach a concentration of 10 mM.
- Catalyst solution (0.1 mM): Each copper compound (2.5  $\mu\text{mol}$ ) was dissolved in the buffer solution to reach 25 mL.
- $\text{H}_2\text{O}_2$  solution (400 mM): The commercial 35% (wt%) hydrogen peroxide aqueous solution was regularly titrated using a known concentration of potassium permanganate in acid conditions. The corresponding volume of peroxide was each time diluted in the buffer solution to reach 2 mL.
- Coumarin-3-carboxylic acid (CCA) solution, (5 mM): CCA (0.0119 g, 0.125 mmol) was dissolved in the buffer solution to reach 25 mL.

The hydroxy radical trap experiments were performed as follow: a 4 mL fluorimetry quartz cuvette was charged, thanks to micropipettes, with 2 mL of the catalyst solution, 800  $\mu\text{L}$  of buffer, 800  $\mu\text{L}$  of the CCA solution. The experiment was started with the addition of 400  $\mu\text{L}$  of the  $\text{H}_2\text{O}_2$  solution. Reference tests were performed without catalyst in all cases the total volume was brought to 4 mL with buffer. For each assay the following fluorimetry parameters were used; Excitation wavelength: 495 nm, Emission wavelength measured: 410-550 nm, Emission slit: 2.5 nm, Absorption slit: 5 nm. The assays were performed at room temperature (20 °C – 25 °C) protected from light.

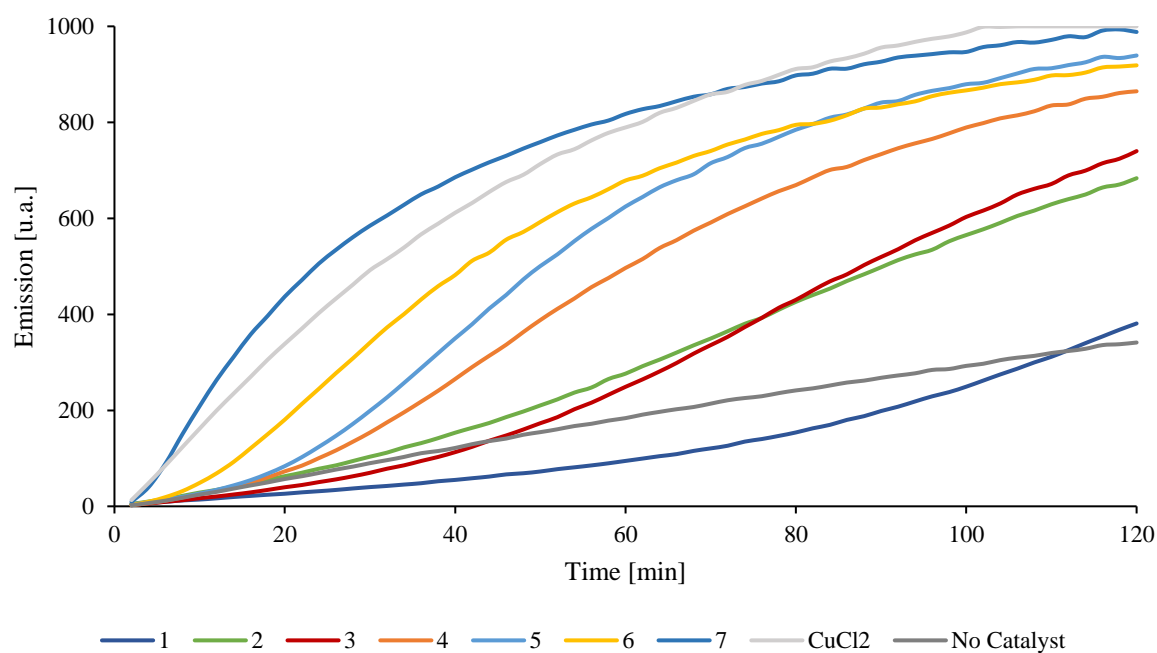

**Figure S51:** Evolution of the emission of 7-hydroxyCoumarin-3carboxylic acid at 447 nm as a function of time over 2 hours. Conditions: 10 mM phosphate buffer pH 7.5; [catalyst]= 50  $\mu$ M; [CCA]= 0.5 mM and [H<sub>2</sub>O<sub>2</sub>]= 40 mM, temperature = r.t.

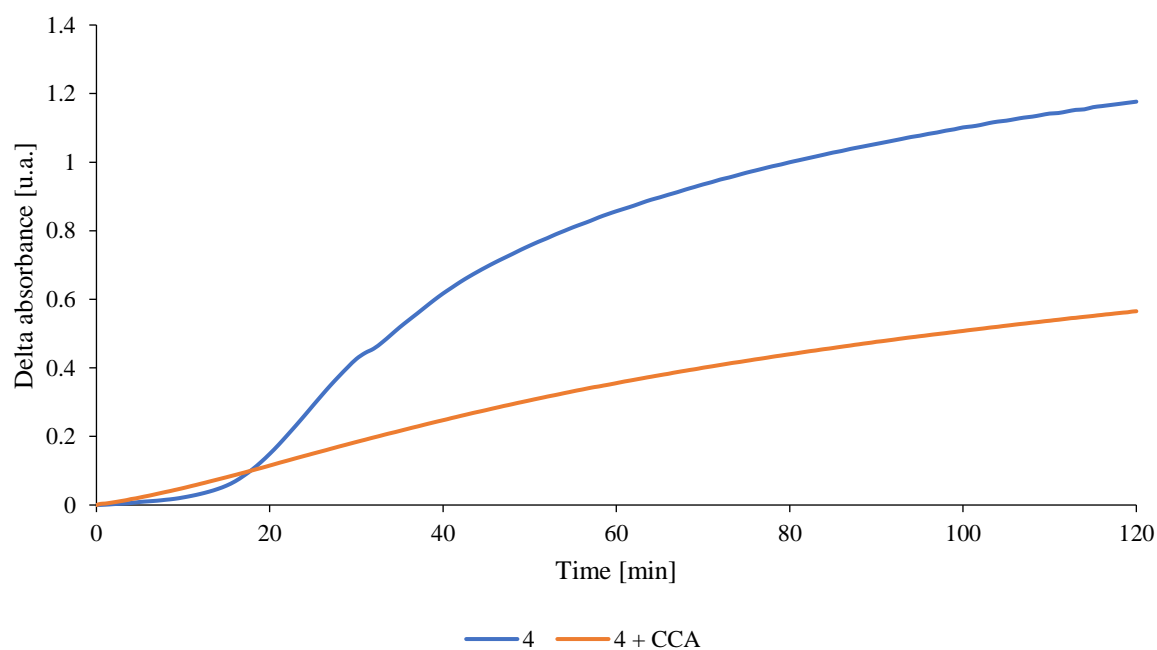

**Figure S52:** Evolution of the absorbance of paranitrophenolate at 400 nm as a function of time over 2 hours for compound **4** without (blue) and with CCA (orange) as radical trap. Conditions: 10 mM phosphate buffer pH 7.5; [catalyst]= 50  $\mu$ M; [PNPG]= 10 mM; [CCA]= 2.5 mM and [H<sub>2</sub>O<sub>2</sub>]= 40 mM, temperature = r.t.



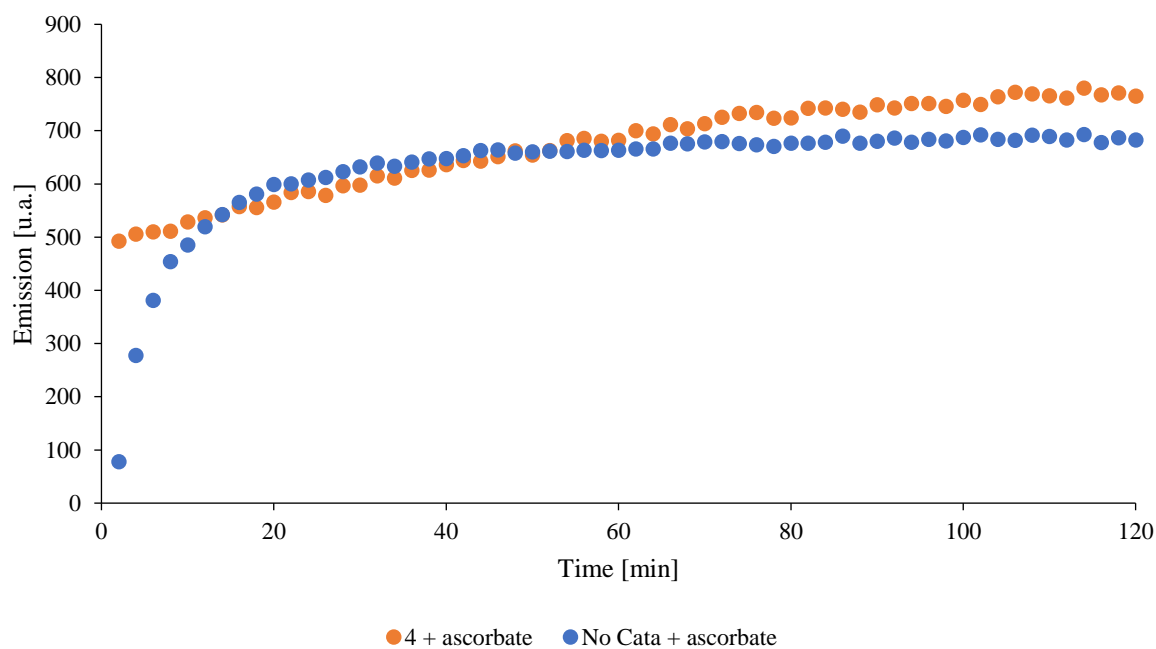

**Figure S53** : Evolution of the emission of 7-hydroxyCoumarin-3carboxylic acid at 447 nm as a function of time over 1 hour without catalyst and with sodium ascorbate. Conditions: 10 mM phosphate buffer pH 7.5; [CCA]= 0.5 mM, [Ascorbate]= 1 mM, [catalyst]= 50  $\mu$ M and [H<sub>2</sub>O<sub>2</sub>]= 40 mM, temperature = r.t.

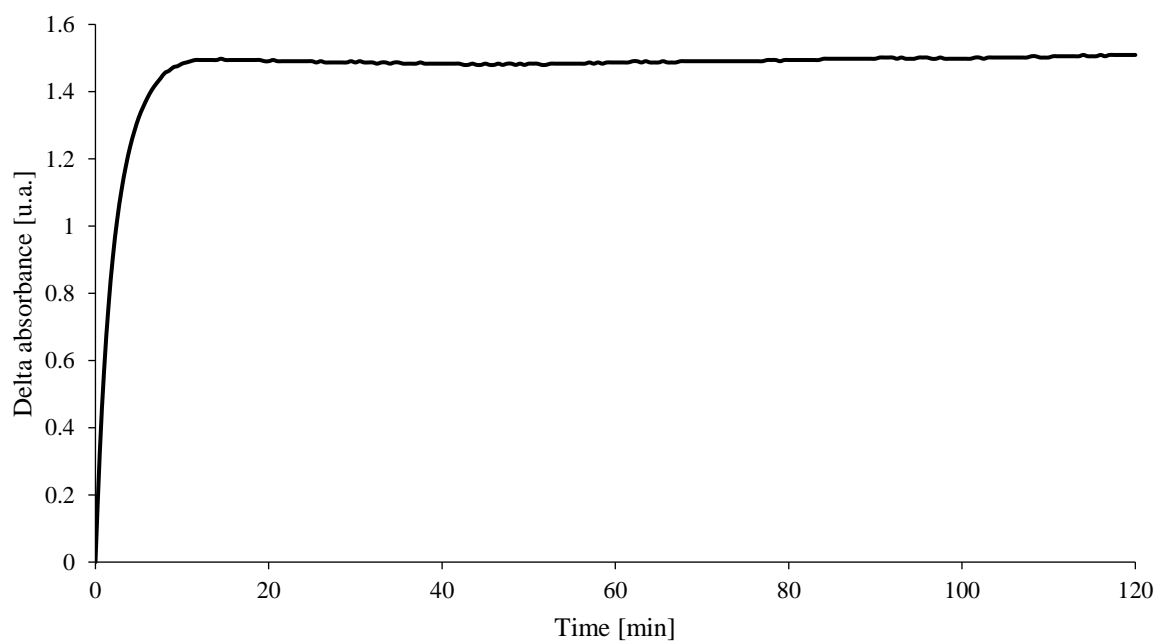

**Figure S54** : Evolution of the absorbance of paranitrophenolate at 400 nm as a function of time over 2 hours without catalyst and with sodium ascorbate. Conditions: 10 mM phosphate buffer pH 7.5; [CCA]= 0.5 mM, [Ascorbate]= 1 mM and [H<sub>2</sub>O<sub>2</sub>]= 40 mM, temperature = r.t.

## 8) Computational Studies

Computations have been carried out using the Jaguar 8.5 pseudospectral program package 8 (Jaguar 8.5, Schrodinger, Inc., New York, NY, 2014). All species have been fully geometry optimized, and the Cartesian coordinates are given in the annex. Density Functional Theory (DFT) was applied by the means of the B3LYP functional<sup>8,9</sup> corrected for dispersion as proposed by Grimme (D3 correction)<sup>10</sup>. The LACV3P basis set as implemented in Jaguar was used for the copper atom and the standard split valence polarized 6-31+G(d) basis set<sup>11</sup> was used for all other atoms. Electronic energies were obtained after corresponding fully analytical single point calculations, at the BP86/6-31+G(d) level of theory. Thermal and entropic contributions to free energy (at 298.15 K) and zero-point energy have been obtained by performing frequency calculations at the B3LYP-D3/6-31+G(d) level of theory.

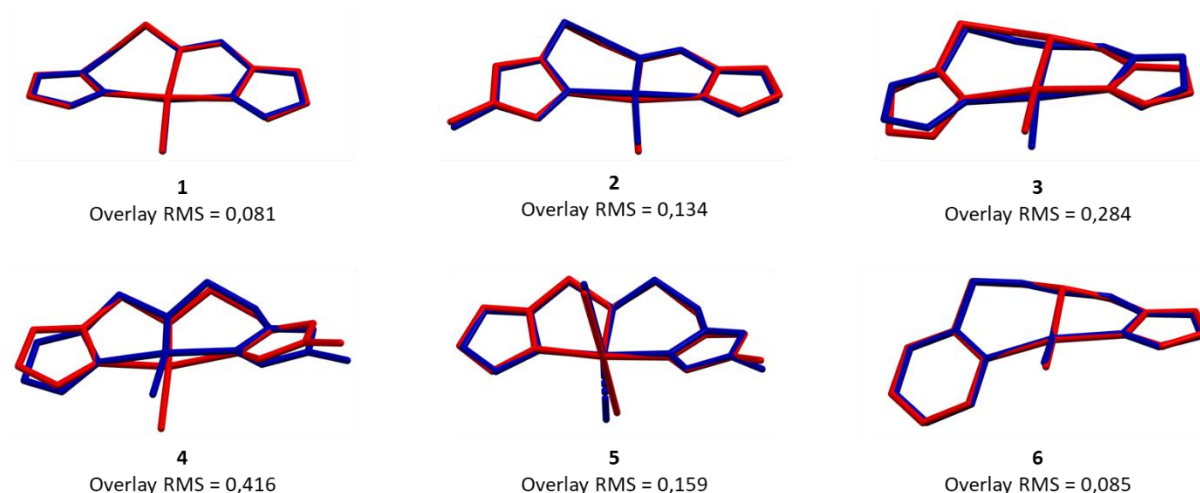

**Figure S55:** Overlay of the X-ray diffraction crystallography structure (Blue) and the DFT geometry optimization (red) for compounds 1-6.

### Complex 1

$E(\text{B3LYP-d3/6-31+G}^*) = -1279.7284 \text{ Ha}$

Solvent = methanol

Cu1 -0.9696006373 2.6163715215 5.7766344641  
 Cl2 0.0615620860 0.5581207053 6.0728913009  
 N3 -1.1668936951 2.9033624477 7.7799827262  
 C4 -0.8740813599 2.3288055983 8.9359078154  
 H5 -0.3852630330 1.3723170512 9.0697074741  
 N6 -1.2894210899 3.1198591673 9.9620167540

H7 -1.1865028217 2.8999148815 10.9544974017  
 C8 -1.8712237982 4.2528281955 9.4429863257  
 H9 -2.2812582348 5.0377788819 10.0669498284  
 C10 -1.7907439756 4.1096959009 8.0716798831  
 C11 -2.1910907619 4.9150775859 6.9372530786  
 H12 -2.6921654736 5.8774018272 7.0824785013  
 N13 -1.9341184987 4.4412187994 5.7646276588  
 C14 -2.3269948751 5.1523344609 4.5449659673  
 H15 -2.5721958652 6.1965510995 4.7784147589  
 H16 -3.2298956579 4.6657217148 4.1538800112  
 C17 -1.2075155617 5.0948277507 3.4902321927  
 H18 -1.4777498784 5.7603567842 2.6623412328  
 H19 -0.2853397588 5.4962065698 3.9343622920

C20 -0.9626971690 3.7166494724 2.9454621234  
N21 -0.8052614029 2.6014211442 3.7675871013  
C22 -0.5815064254 1.5532055182 2.9683256803  
H23 -0.4156506638 0.5363518242 3.2924355423  
N24 -0.5849845189 1.9464756835 1.6802633514  
H25 -0.4353204625 1.3362626188 0.8761935265  
C26 -0.8259220882 3.3086750535 1.6398563187  
H27 -0.8703071419 3.8612322819 0.7100054504

## Complex 2

E(B3LYP-d3/6-31+G\*) = -1319.0402 Ha

Solvent = methanol

Cu1 4.0657823861 2.4674112151 6.2550382707  
Cl2 5.0027608761 0.3545075142 6.5105011373  
N3 3.9995960102 2.2882327323 4.2387896938  
C4 4.3649469089 1.4660515836 3.2684561256  
H5 4.8741615529 0.5185820487 3.3909123647  
N6 4.0064786753 1.9877805751 2.0643690428  
H7 4.1742211315 1.5472140754 1.1578032792  
C8 3.3842466370 3.1970842592 2.2708167941  
H9 3.0048619823 3.8051806897 1.4585611715  
C10 3.3837337952 3.3796563142 3.6393864741  
C11 2.8926896306 4.4084255918 4.5325606676  
H12 2.3873417172 5.2976689640 4.1421982413  
N13 3.0738320201 4.2174230979 5.7956562427  
C14 2.5963775221 5.1743588612 6.7967728623  
H15 1.7071098768 4.7404493119 7.2727011888  
H16 2.3062261408 6.1168117958 6.3146937347  
C17 3.6761277125 5.4368148990 7.8600728195  
H18 4.5898199606 5.7862114080 7.3581913679  
C19 3.9790136899 4.2413333638 8.7152057062  
N20 4.1855645686 2.9662313811 8.1944357542  
C21 4.4499804886 2.1627188670 9.2308398193  
H22 4.6584349513 1.1040541701 9.1703331766  
N23 4.4242685938 2.8569272913 10.3841376736  
C24 4.1252686505 4.1742152093 10.0795451786  
H25 4.0502405859 4.9363615413 10.8459915956  
C26 4.6855679816 2.3246354751 11.7253340065  
H27 4.8518467053 1.2465814253 11.6528469810  
H28 3.8232649145 2.5183172506 12.3713890468  
H29 3.3350758005 6.2542735757 8.5061018241  
H30 5.5765333493 2.8042257803 12.1436916225

## Complex 3

E(B3LYP-d3/6-31+G\*) = -1280.9463 Ha

Solvent = methanol

Cu1 2.3096684824 12.3761581681 8.5633282475  
Cl2 1.9333329246 14.6814486626 8.6795669179  
N3 2.4946695804 12.1380063023 10.5453877118  
C4 2.8902936443 13.0617017024 11.4272616347

H5 3.1093779715 14.0958164061 11.2028098205  
N6 2.9820849842 12.5163687099 12.6554679421  
H7 3.2614177564 13.0127488829 13.5025968807  
C8 2.6338564402 11.1795357223 12.5670423710  
C9 2.3268218791 10.9463868989 11.2476441050  
C10 1.8740761204 9.6772479921 10.5866352790  
H11 2.0316981337 8.8419914566 11.2796032163  
H12 0.7923797620 9.7122756411 10.3834350484  
C13 2.6199982711 9.3676677828 9.2829844977  
H14 2.4130528253 8.3340162696 8.9732888830  
H15 3.7009784078 9.4693236597 9.4286167924  
N16 2.2265084898 10.2926190899 8.1856718243  
H17 1.2275327587 10.1466846542 7.9855531444  
C18 2.9924762439 10.0202082269 6.9312535398  
H19 4.0508910369 9.9423280638 7.2115683109  
H20 2.6906962510 9.0631766367 6.4862524900  
C21 2.7922242373 11.1742618436 5.9965802877  
N22 2.5201626025 12.4055516769 6.5693137218  
C23 2.4391715997 13.2958292758 5.5798741035  
H24 2.2259120996 14.3505185559 5.6888550881  
N25 2.6609610416 12.6785774063 4.3998532144  
H26 2.6606956327 13.1346514470 3.4863477402  
C27 2.8817974584 11.3302862721 4.6356348938  
H28 3.0959603781 10.6304241154 3.8374201956  
H29 2.6292524381 10.5251181491 13.4292935091

## Complex 4

E(B3LYP-d3/6-31+G\*) = -1320.2580 Ha

Solvent = methanol

Cu1 5.3181741291 4.4522203440 5.2121528427  
Cl2 5.1853076532 6.5512288282 6.2414155758  
N3 6.2803271441 5.1760306365 3.6195385129  
C4 6.7053205526 6.3575371691 3.1717060488  
H5 6.5904522775 7.3068403762 3.6761878750  
N6 7.3097366478 6.1936832623 1.9758937117  
H7 7.7234053962 6.9410262842 1.4175334995  
C8 7.2648717181 4.8510497327 1.6327604438  
H9 7.6919326308 4.4736317820 0.7125402521  
C10 6.6206968101 4.2258355420 2.6712497029  
C11 6.2993453030 2.7972800125 2.9923114996  
H12 6.0841428493 2.2041524341 2.0946656593  
H13 7.1473876328 2.3308748386 3.5096923940  
N14 5.1434981373 2.7714716520 3.9400706449  
H15 4.2889427475 2.9806354074 3.4066129720  
C16 4.9791774307 1.4319870906 4.5694663585  
H17 5.9323890058 1.1698671775 5.0405789459  
H18 4.7687025781 0.6903888203 3.7874737739  
C19 3.8553053344 1.4234980286 5.6136156380  
H20 2.9414321060 1.8448621993 5.1687059781  
H21 3.6273228201 0.3821626579 5.8692423461  
C22 4.2199643913 2.1630263758 6.8656424979  
N23 4.7803901609 3.4354297390 6.8393800417  
C24 4.9841936105 3.7985972739 8.1103013670  
H25 5.4123908752 4.7353489315 8.4383301919

N26 4.5860406048 2.8214574537 8.9467328733  
C27 4.0998267507 1.7763132092 8.1780719149  
H28 3.7176771735 0.8671690176 8.6255979796  
C29 4.6535918321 2.8518552833 10.4112751077  
H30 5.0687396134 3.8125537914 10.7261905936  
H31 5.2973136298 2.0414545499 10.7679776532  
H32 3.6475822020 2.7362422274 10.8269407242

### Complex 5 (Cl as counter ion)

E(B3LYP-d3/6-31+G\*) = -1320.2573 Ha

Solvent = methanol

Cu1 6.1326616525 6.0719871282 13.0485871996  
N2 5.9621543613 7.9706780869 12.4692825342  
C3 5.9795883822 8.6924110386 11.2866421698  
H4 6.1809717591 8.2155533217 10.3375210462  
C5 5.7135820122 10.0061563551 11.5779547610  
H6 5.6380089505 10.8828742088 10.9481331516  
N7 5.5384219433 10.0713593636 12.9542525546  
H8 5.3235610182 10.9131222982 13.4899846538  
C9 5.6936884847 8.8275851956 13.4532149643  
C10 5.5331037111 8.3513378521 14.8598756393  
H11 4.4638746781 8.2464014646 15.0860367341  
H12 5.9688953786 9.0479378384 15.5874181013  
N13 6.1620839194 7.0016515189 14.9550218811  
H14 7.1704847379 7.1337255967 15.1096411555  
C15 5.6101527717 6.2254803625 16.0997700681  
H16 4.5306756051 6.1308771104 15.9394131111  
C17 6.2564441541 4.8410098847 16.2119238107  
C18 5.8216431607 3.8930718350 15.1359652538  
N19 5.8069499837 4.2449356376 13.7904500158  
C20 5.3901831010 3.1695024605 13.1118832594  
H21 5.2704464033 3.1064408193 12.0393438732  
N22 5.1408549911 2.1495512877 13.9554942356  
C23 5.4026804667 2.5896274920 15.2423184138  
H24 5.2793369284 1.9445450750 16.1035938712  
C25 4.6454121045 0.8182606055 13.5903218647  
H26 3.6203317084 0.6915976640 13.9548424360  
H27 5.2919972664 0.0547250301 14.0347495626  
H28 4.6621794665 0.7193717920 12.5019131664  
Cl29 6.6453238450 5.3090010953 10.8993075185  
H30 5.7719930380 6.7894235673 17.0277966877  
H31 7.3518483060 4.9513667590 16.2081471407  
H32 5.9916812845 4.4156713487 17.1870897981

### Complex 5 (ClO<sub>4</sub> as counter ion)

E(B3LYP-d3/6-31+G\*) = -2497.4063 Ha

Solvent = methanol

Cu1 6.0418555846 6.0332471037 12.9048289409

N2 6.1566118194 7.9449098451 12.2584704249  
C3 6.4353274864 8.6734160051 11.1214967322  
H4 6.7335688789 8.1976195755 10.2019705395  
C5 6.3620511349 10.0051316113 11.4221408179  
H6 6.5317847752 10.8901369313 10.8289592139  
N7 6.0455014929 10.0715607245 12.7711943040  
H8 5.9327069669 10.9165287243 13.3140923047  
C9 5.9315746936 8.8071762506 13.2373414981  
C10 5.6214982712 8.3449711297 14.6248314520  
H11 4.5421892774 8.1925030438 14.7313677218  
H12 5.9577636840 9.0684461209 15.3819981228  
N13 6.2701553454 7.0280158448 14.7812741152  
H14 7.2878930459 7.1431472152 14.7659520337  
C15 5.8616784425 6.3045268085 16.0027807474  
H16 4.7769095288 6.1702195562 15.9590432792  
C17 6.5586126357 4.9370790611 16.0758229866  
C18 6.0076024480 3.9581731166 15.0876601177  
N19 5.8885623840 4.2572460097 13.7423884247  
C20 5.3357639022 3.2080746088 13.1509327350  
H21 5.0791494233 3.1508836071 12.1068514036  
N22 5.0928306622 2.2352713721 14.0506291366  
C23 5.5110158097 2.6973985831 15.2875514380  
H24 5.4071269692 2.1027062104 16.1826693733  
C25 4.3691450662 0.9974801637 13.7955719720  
H26 3.3690711614 1.0548248800 14.2358197916  
H27 4.9159038354 0.1505773145 14.2194683827  
H28 4.2742444726 0.8592669627 12.7168631705  
O29 6.1734908662 5.2047227394 11.0220975121  
H30 7.0573707237 5.5285797767 10.7134721501  
C31 5.1299770913 5.5099465200 10.0734064161  
H32 5.0322536928 6.5902792658 9.9315447601  
H33 4.2026445707 5.1255887142 10.4988357128  
H34 5.3510835955 5.0187707675 9.1201856548  
Cl35 2.7099612730 5.4911138055 13.3400434329  
O36 1.3961910575 6.1774420338 13.3290512666  
O37 3.0246125556 4.9389407715 14.6976455649  
O38 2.7565901156 4.3940600411 12.3164043484  
O39 3.7978276258 6.5158576643 12.9802870991  
O40 8.3769881391 5.8524966457 13.0560934700  
O41 9.2237871834 8.0727891397 12.4356540645  
O42 8.5984351294 6.4525264483 10.6879981442  
Cl43 9.2400520185 6.6290311306 12.0602953233  
O44 10.6116838697 6.0797630023 12.0542480371  
H45 6.1140038306 6.9004989127 16.8931202546  
H46 6.4310128931 4.5325235471 17.0855015331  
H47 7.6390204704 5.0686021197 15.9182748399

### Complex 6

E(B3LYP-d3/6-31+G\*) = -1303.0014 Ha

Solvent = methanol

Cu1 3.7546713132 5.5834947965 3.6832390367  
Cl2 1.7580437629 4.4263715658 3.9089309119  
N3 3.9824970725 5.8914362152 5.6426235902  
C4 3.4040566567 5.5170200377 6.7833102740

H5 2.5416506816 4.8711864624 6.8775596968  
N6 4.0509439250 6.0890984057 7.8209434539  
H7 3.8073056561 5.9705031992 8.8045714399  
C8 5.0855401700 6.8701735457 7.3287663582  
H9 5.7485662693 7.4283267924 7.9768222997  
C10 5.0328468047 6.7359147838 5.9639647417  
C11 5.8652016840 7.2432767887 4.8232880052  
H12 6.6933284986 6.5527613873 4.6196537316  
N13 5.0000783380 7.2633103870 3.6062331912  
H14 4.3299107298 8.0382267755 3.7038565833  
C15 5.7565546546 7.4707320716 2.3466424338  
H16 6.5854396717 6.7554339164 2.3279957620  
C17 4.8493857217 7.2711648701 1.1232210811  
H18 3.8908177692 7.7848061917 1.2888845202

H19 5.3180490391 7.7534105783 0.2590037145  
C20 4.6011668109 5.8167308867 0.7934440108  
N21 4.1407288615 4.9924832051 1.7694015088  
C22 3.9477414666 3.6810111562 1.4935159838  
H23 3.5795111167 3.0688824258 2.3087990221  
C24 4.1846003437 3.1338240179 0.2363840440  
C25 4.8596532507 5.3232919375 -0.4922261135  
C26 4.6418647635 3.9753919468 -0.7819515667  
H27 4.0047420904 2.0753800092 0.0659321505  
H28 5.2220672910 6.0029905022 -1.2595558276  
H29 4.8336124829 3.5894425070 -1.7815031377  
H30 6.1815935444 8.4827097141 2.3362674222  
H31 6.2902413973 8.2352696494 5.0202780266

## 9) NMR spectra

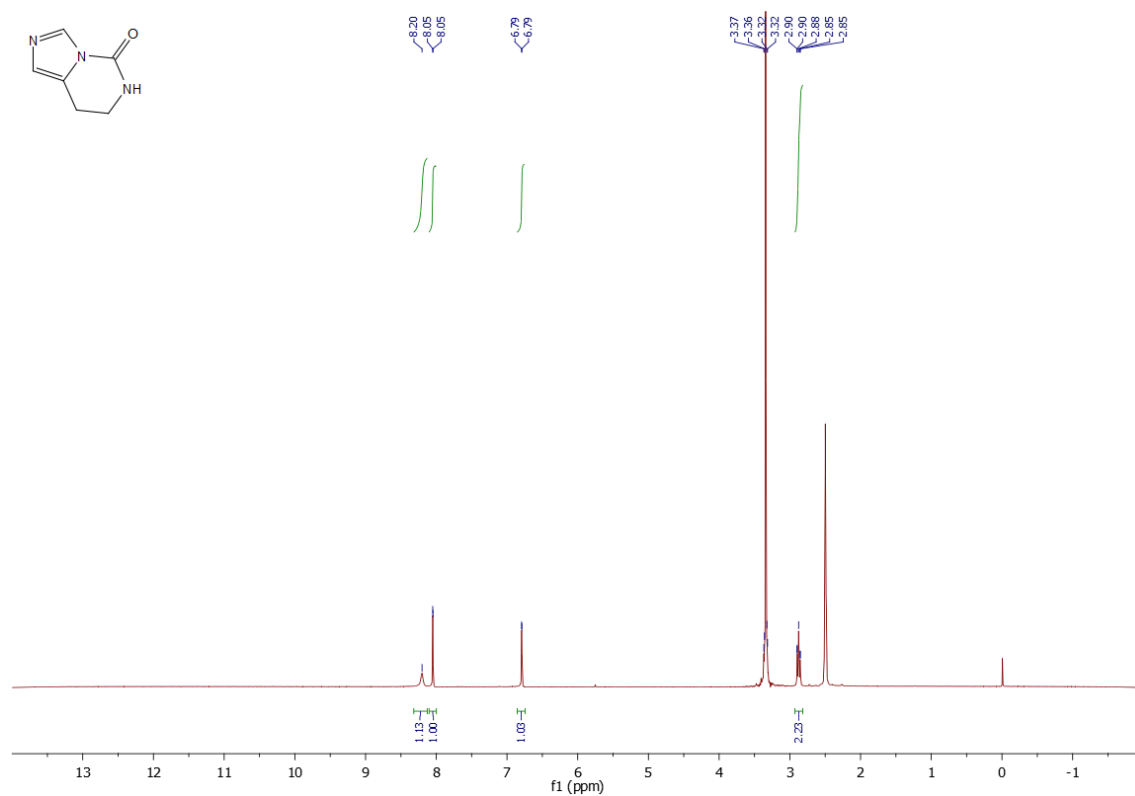

**Figure S56:** <sup>1</sup>H NMR spectrum of **a1** in *d*<sub>6</sub>-DMSO at 25°C.

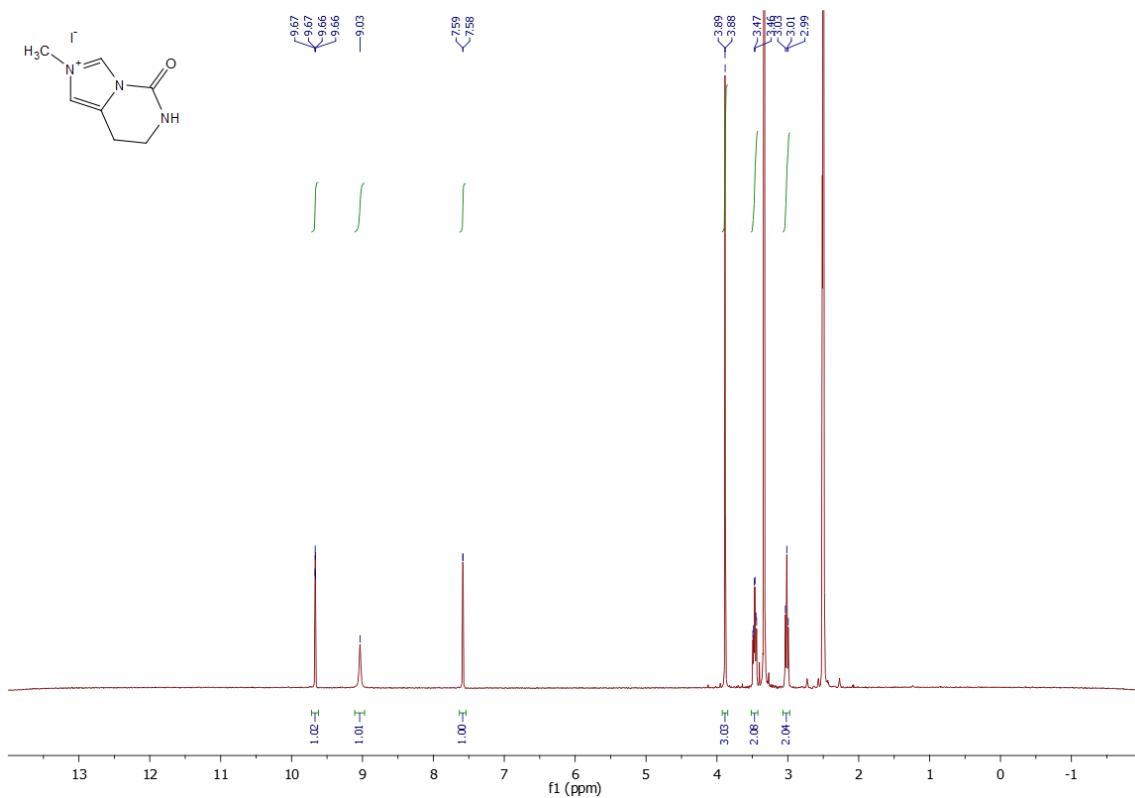

**Figure S57:** <sup>1</sup>H NMR spectrum of **a2** in *d*<sub>6</sub>-DMSO at 25°C.

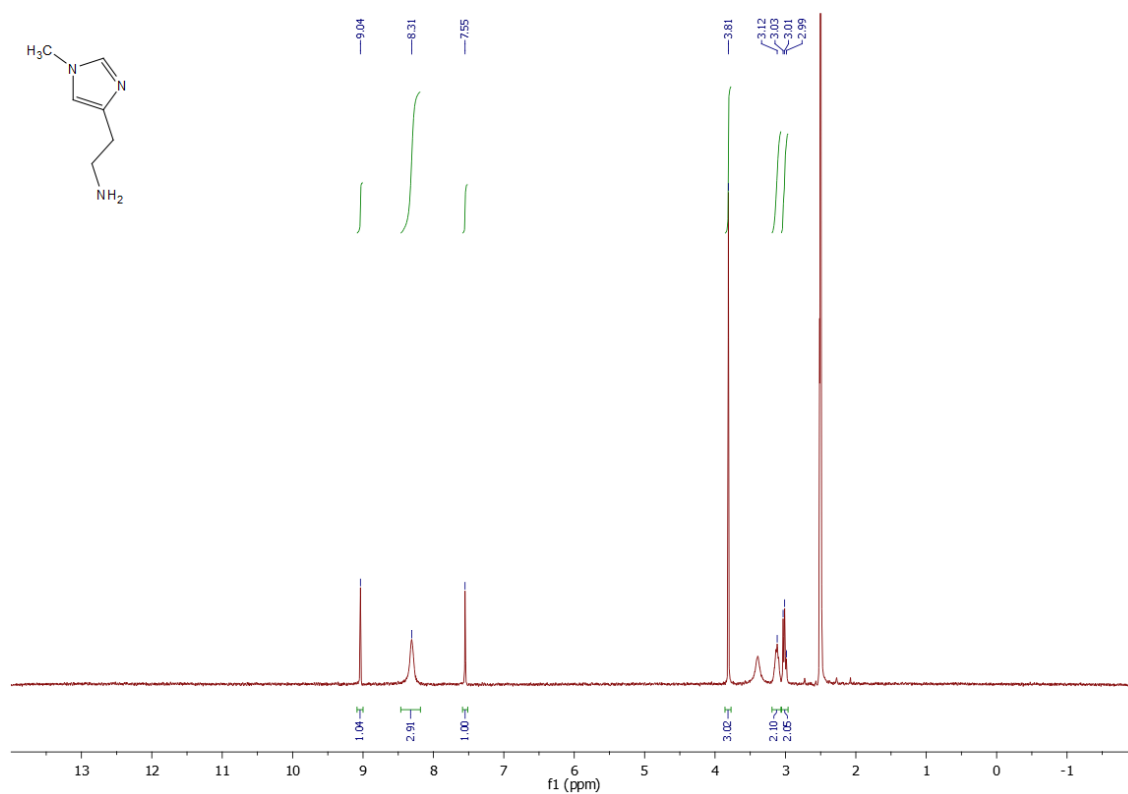

**Figure S58:** <sup>1</sup>H NMR spectrum of **a3** in *d*<sub>6</sub>-DMSO at 25°C.

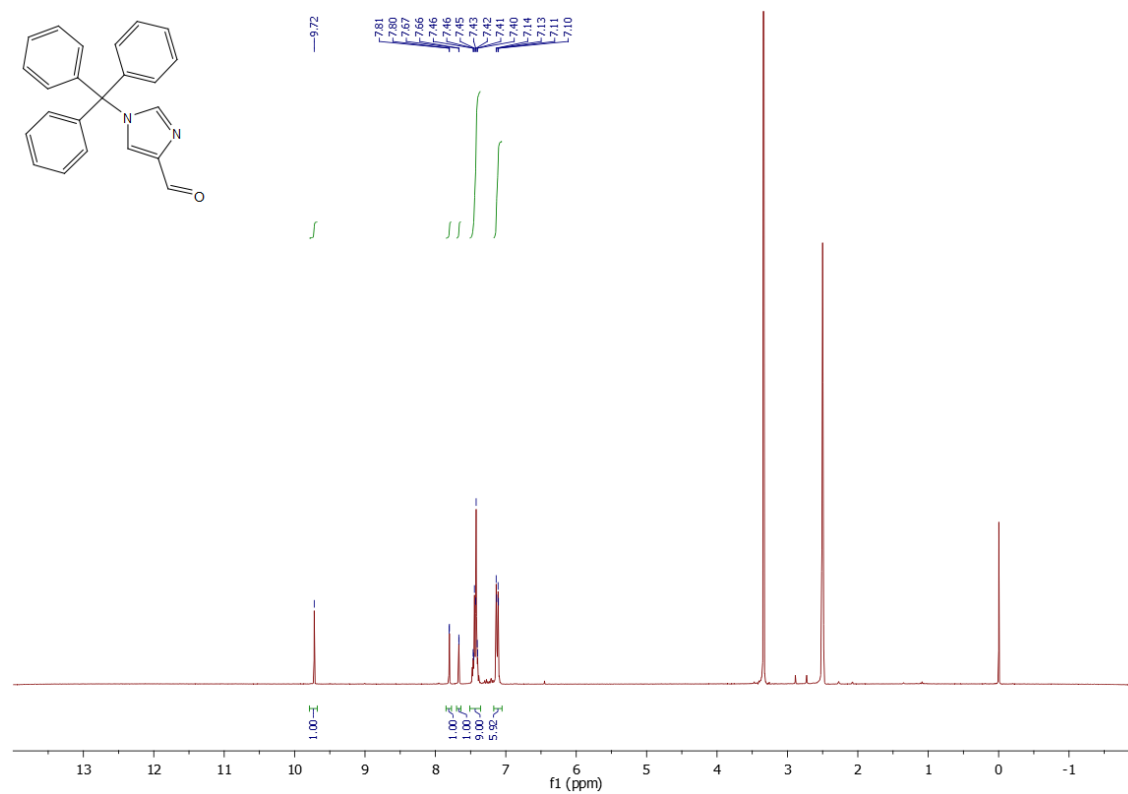

**Figure S59:** <sup>1</sup>H NMR spectrum of **a4** in *d*<sub>6</sub>-DMSO at 25°C.

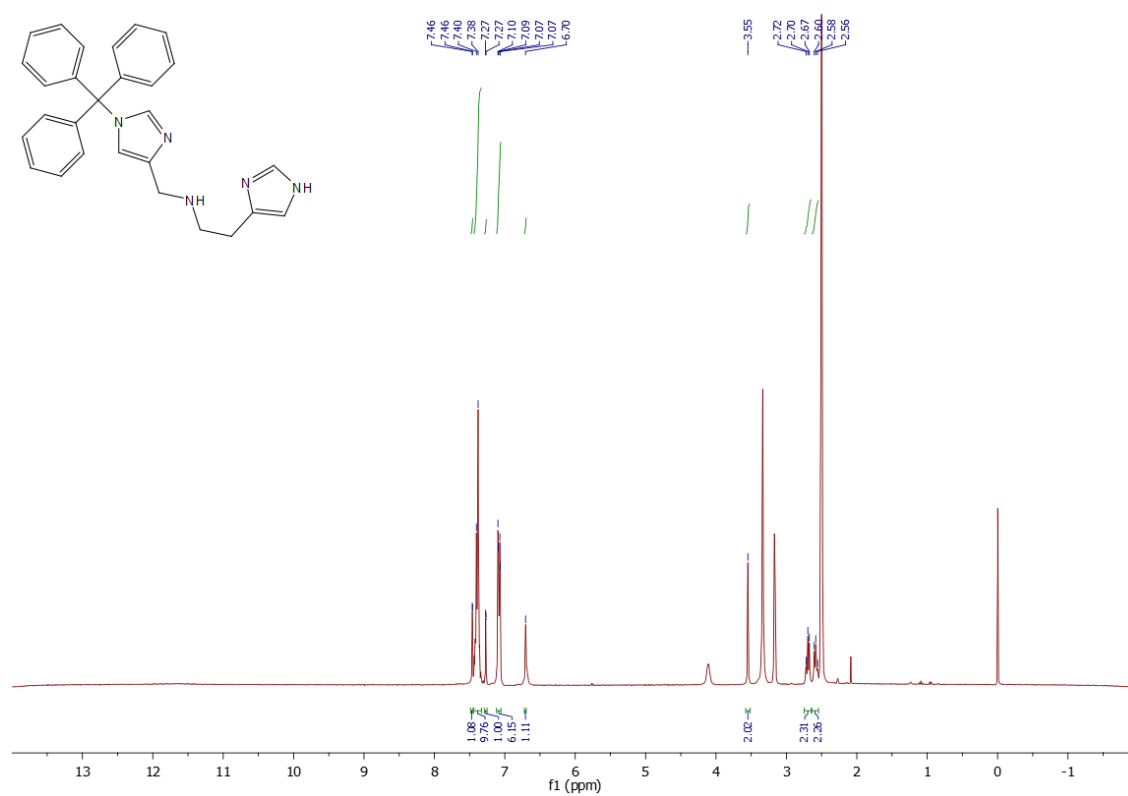

**Figure S60:** <sup>1</sup>H NMR spectrum of L3<sup>Tr</sup> in *d*<sub>6</sub>-DMSO at 25°C.

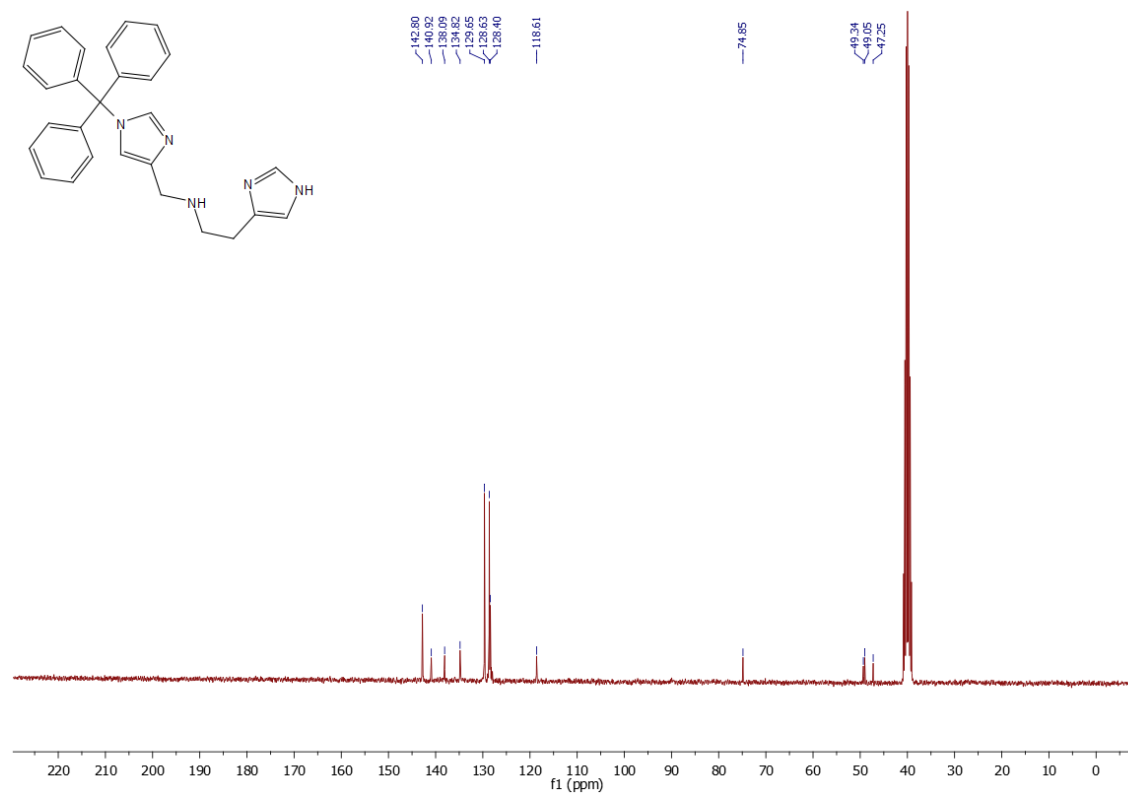

**Figure S61:** <sup>13</sup>C NMR spectrum of L3<sup>Tr</sup> in *d*<sub>6</sub>-DMSO at 25°C.



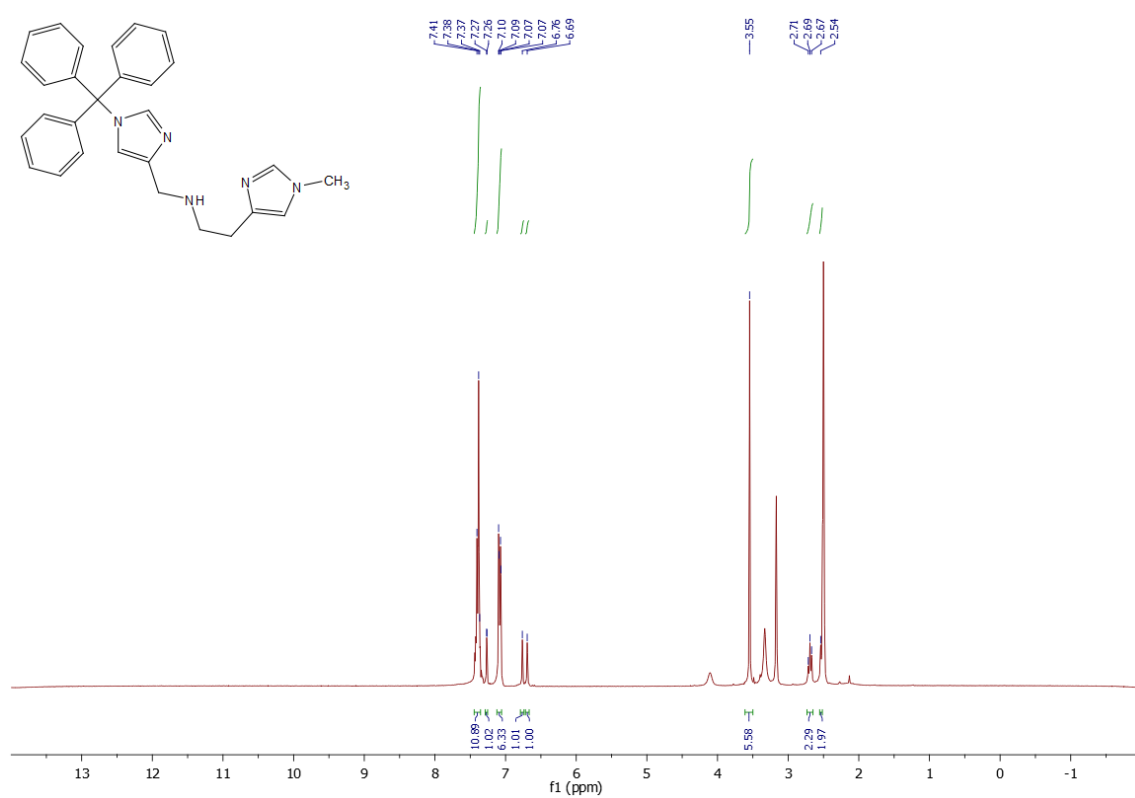

**Figure S62:** <sup>1</sup>H NMR spectrum of **L4<sup>Tr</sup>** in *d*6-DMSO at 25°C.

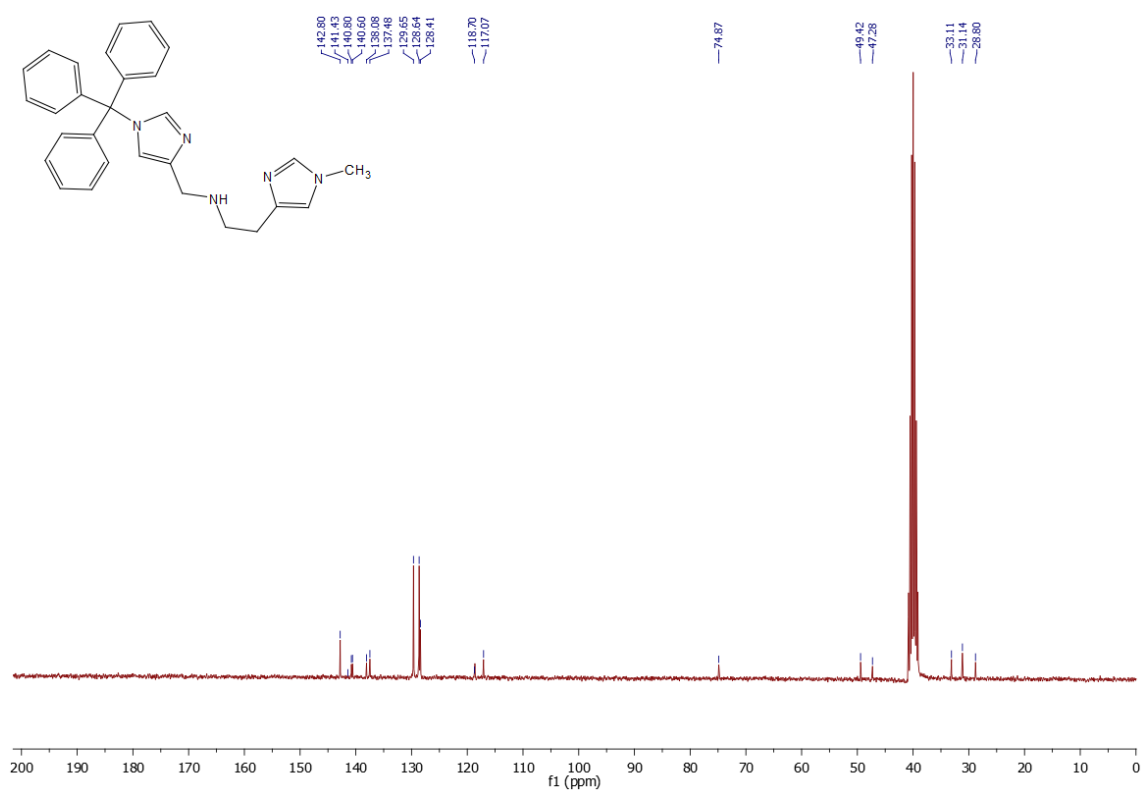

**Figure S63:** <sup>13</sup>C NMR spectrum of **L4<sup>Tr</sup>** in *d*6-DMSO at 25°C.

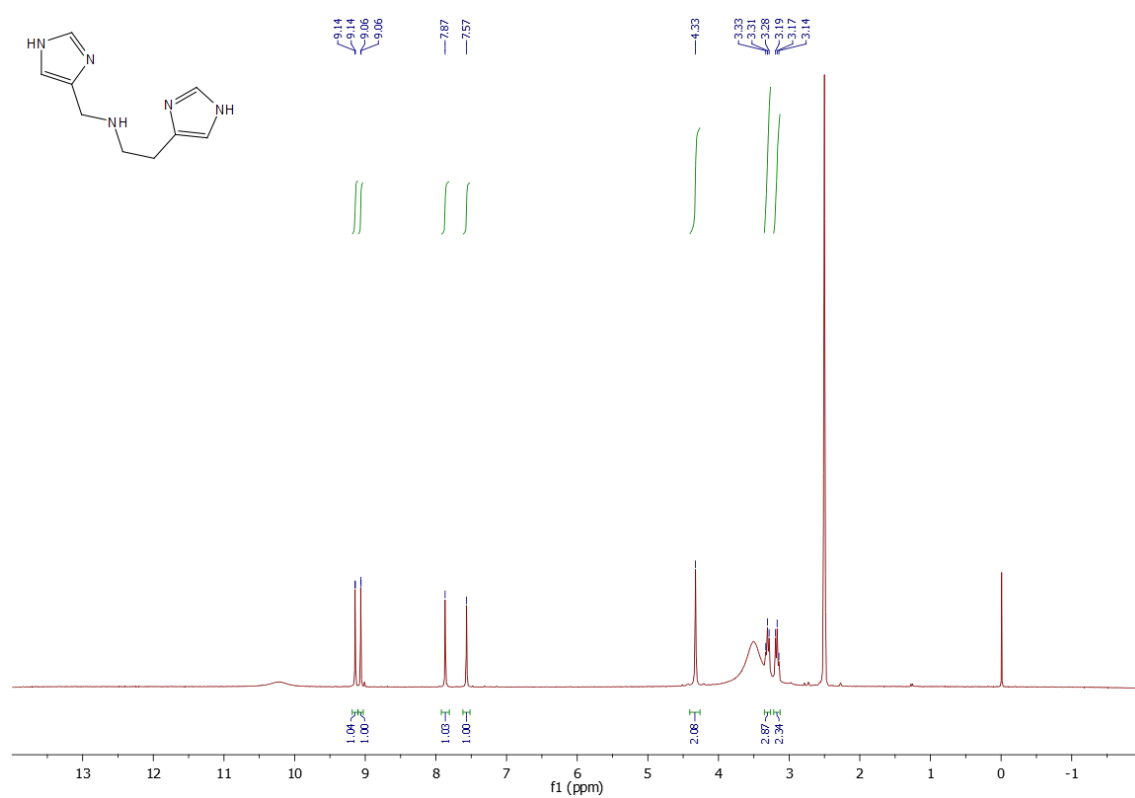

**Figure S64:** <sup>1</sup>H NMR spectrum of **L3** in *d*<sub>6</sub>-DMSO at 25°C.

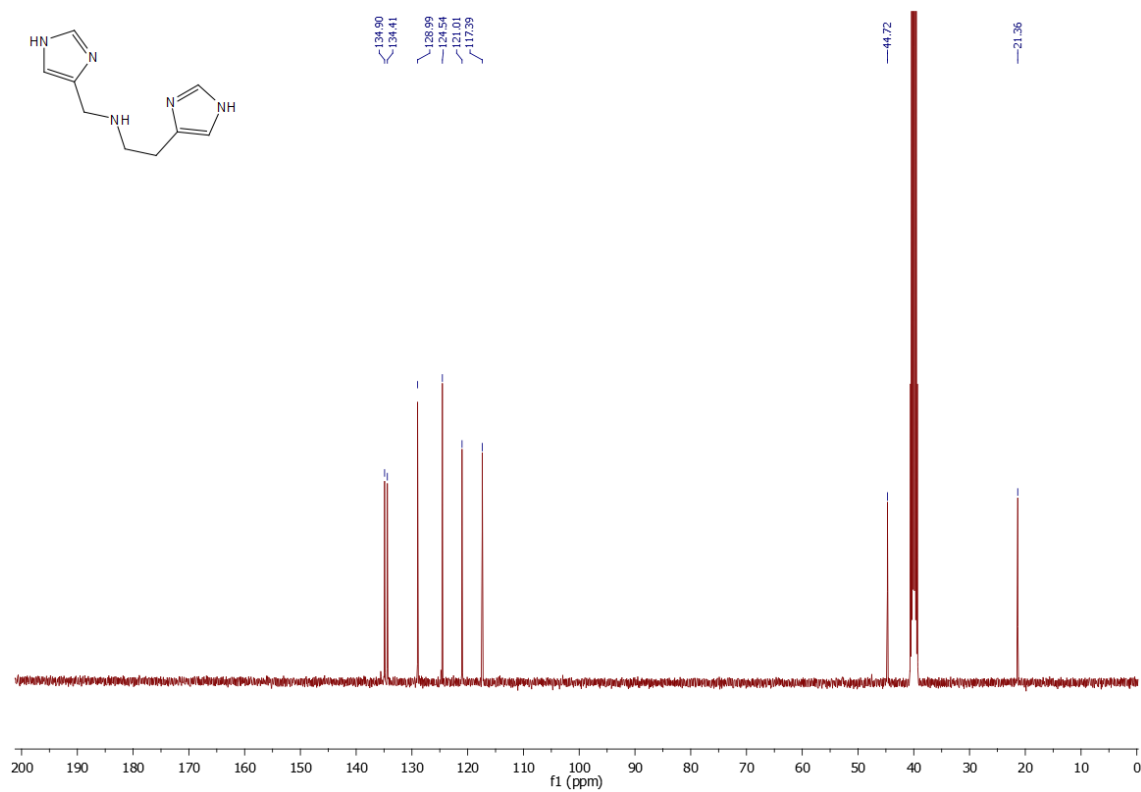

**Figure S65:** <sup>13</sup>C NMR spectrum of **L3** in *d*<sub>6</sub>-DMSO at 25°C.

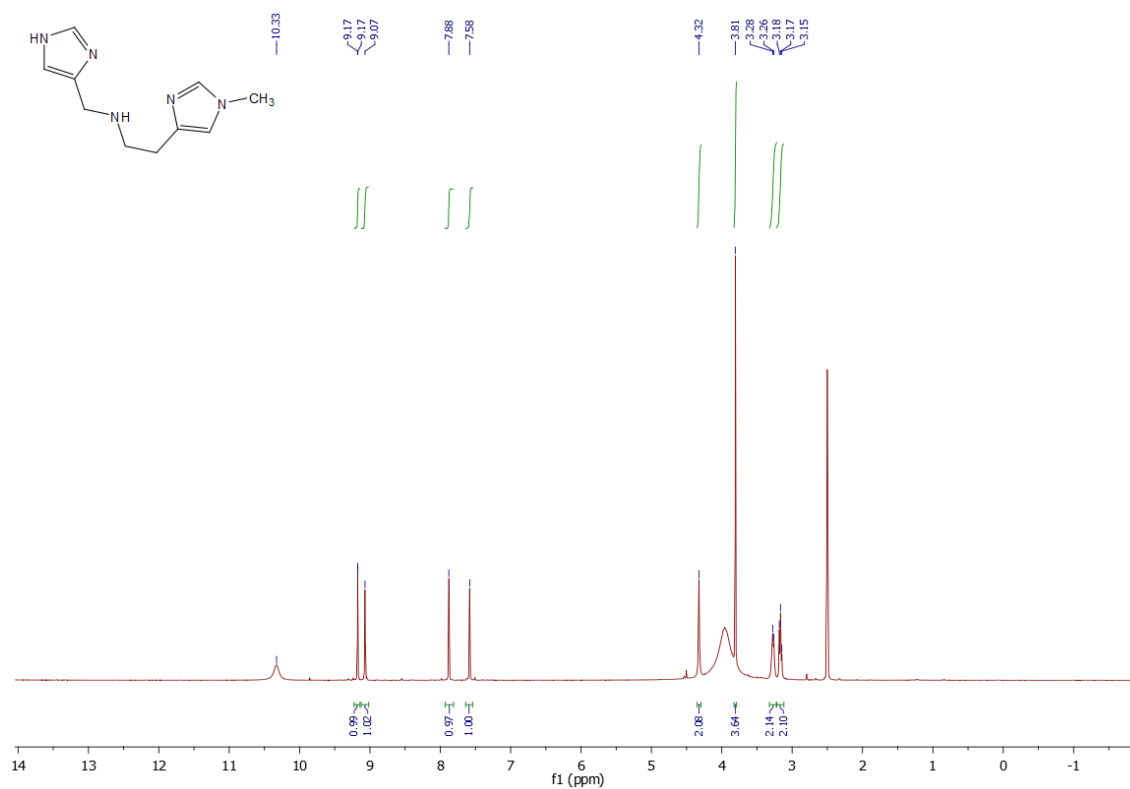

**Figure S66:** <sup>1</sup>H NMR spectrum of L4 in d<sub>6</sub>-DMSO at 25°C.

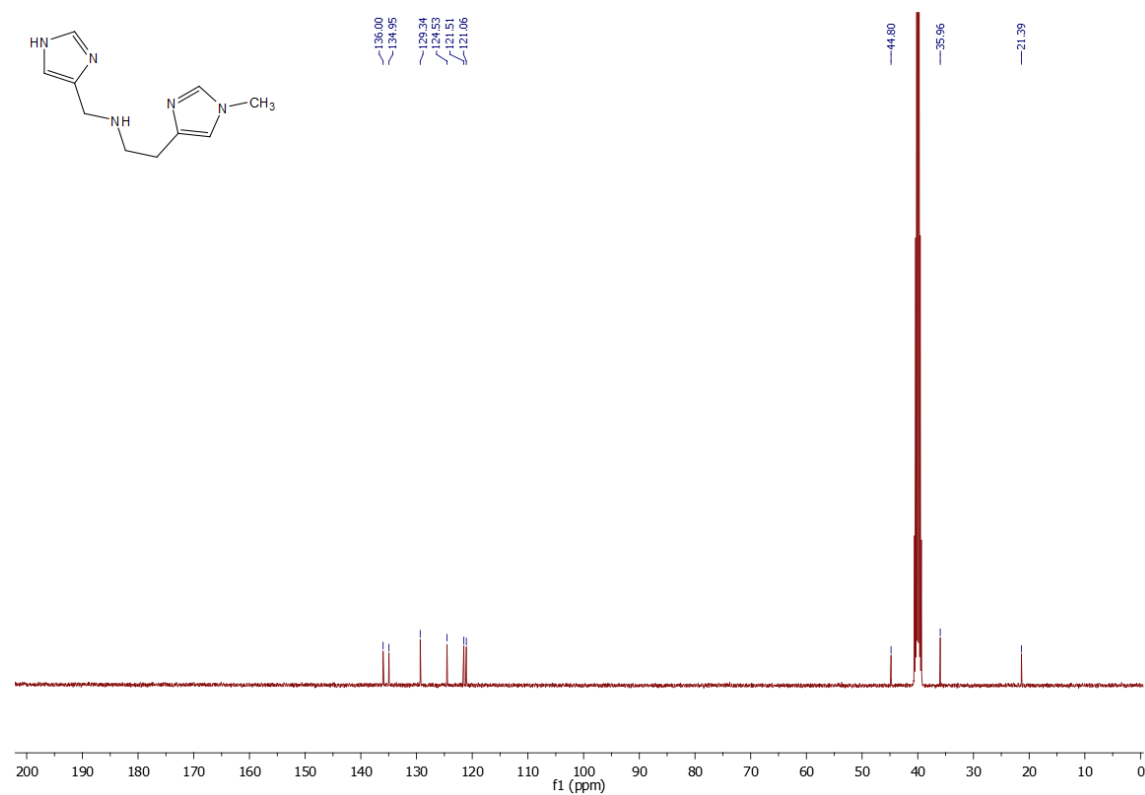

**Figure S67:** <sup>13</sup>C NMR spectrum of L4 in d<sub>6</sub>-DMSO at 25°C.

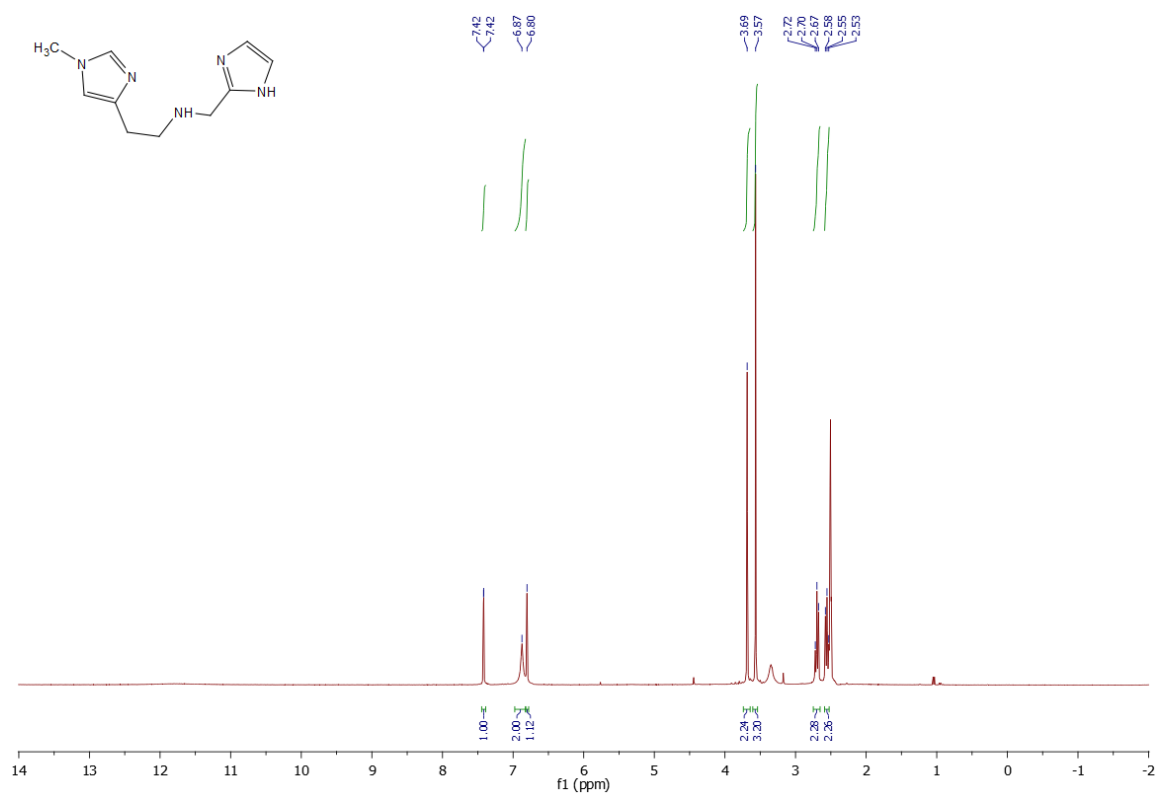

**Figure S68:** <sup>1</sup>H NMR spectrum of **L5** in *d*<sub>6</sub>-DMSO at 25°C.

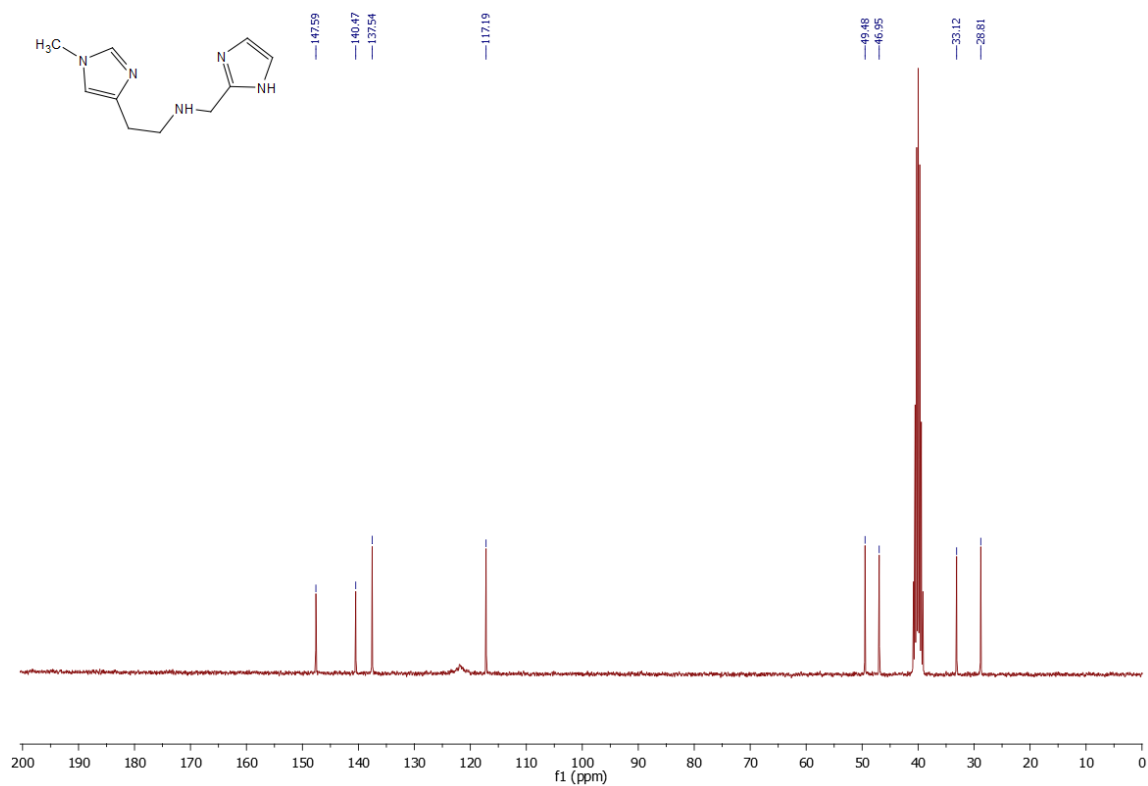

**Figure S69:** <sup>13</sup>C NMR spectrum of **L5** in *d*<sub>6</sub>-DMSO at 25°C.

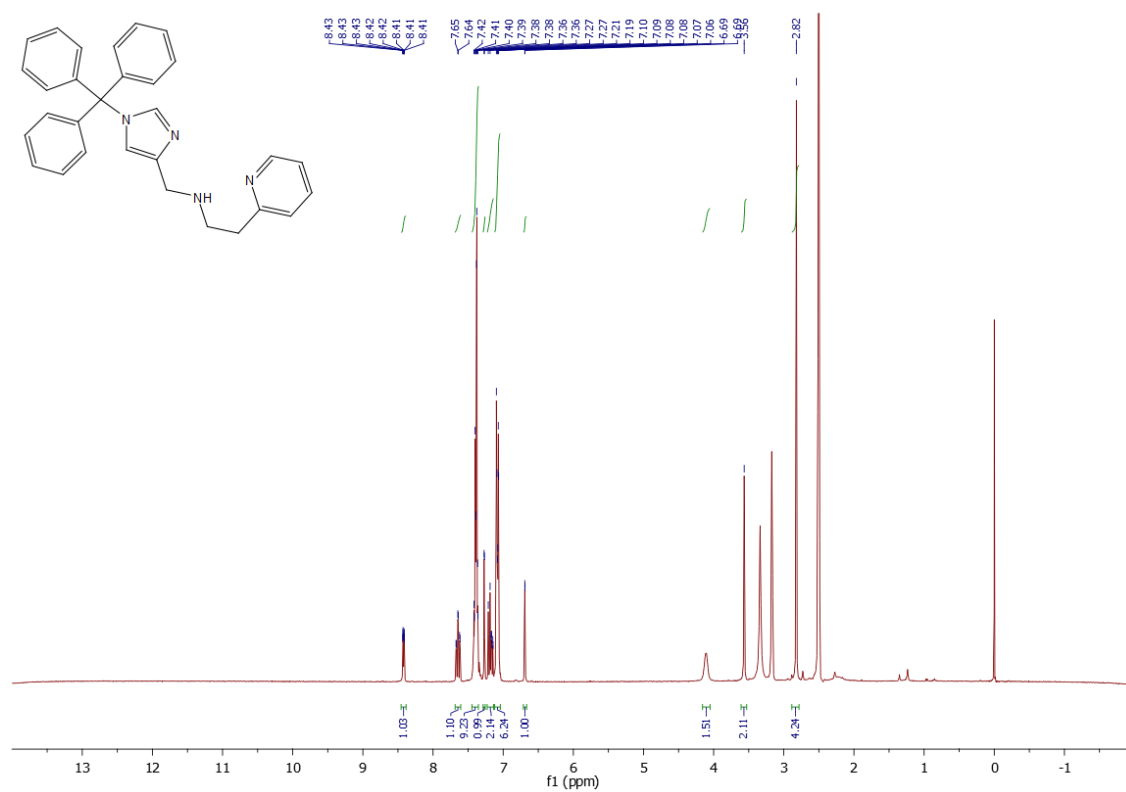

**Figure S70:** <sup>1</sup>H NMR spectrum of L6<sup>Tr</sup> in d<sub>6</sub>-DMSO at 25°C.

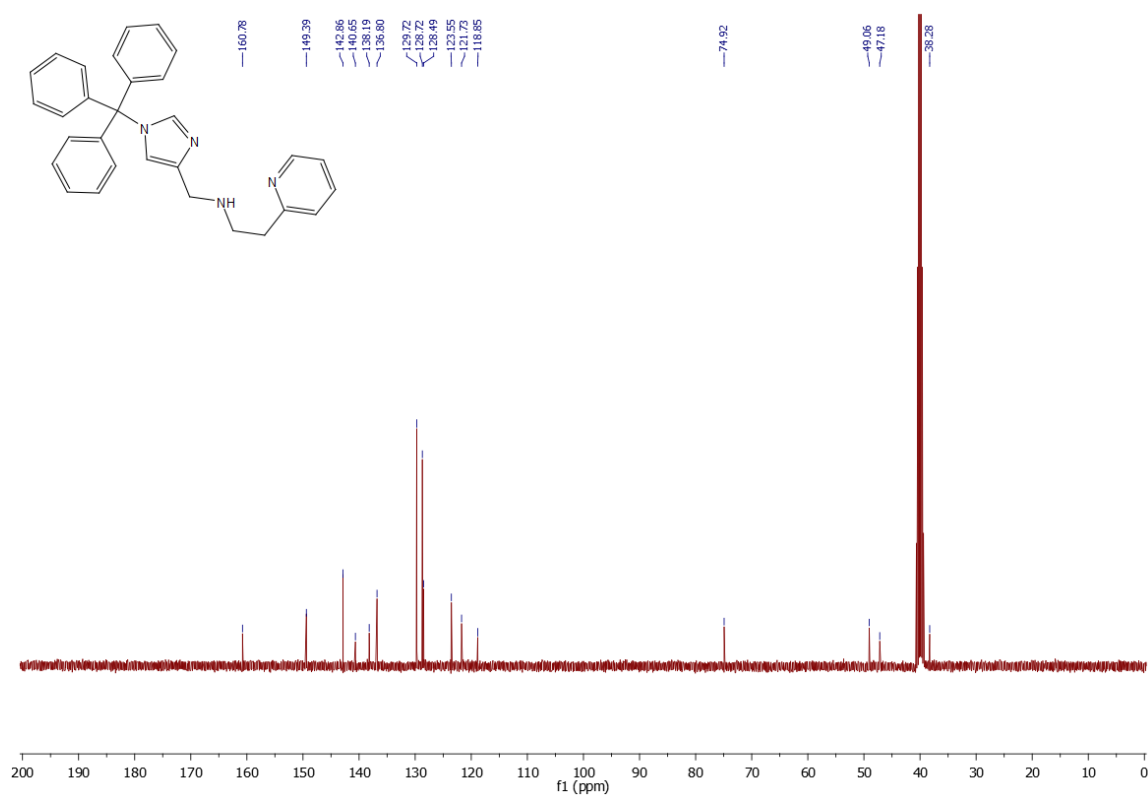

**Figure S71:** <sup>13</sup>C NMR spectrum of L6<sup>Tr</sup> in d<sub>6</sub>-DMSO at 25°C.

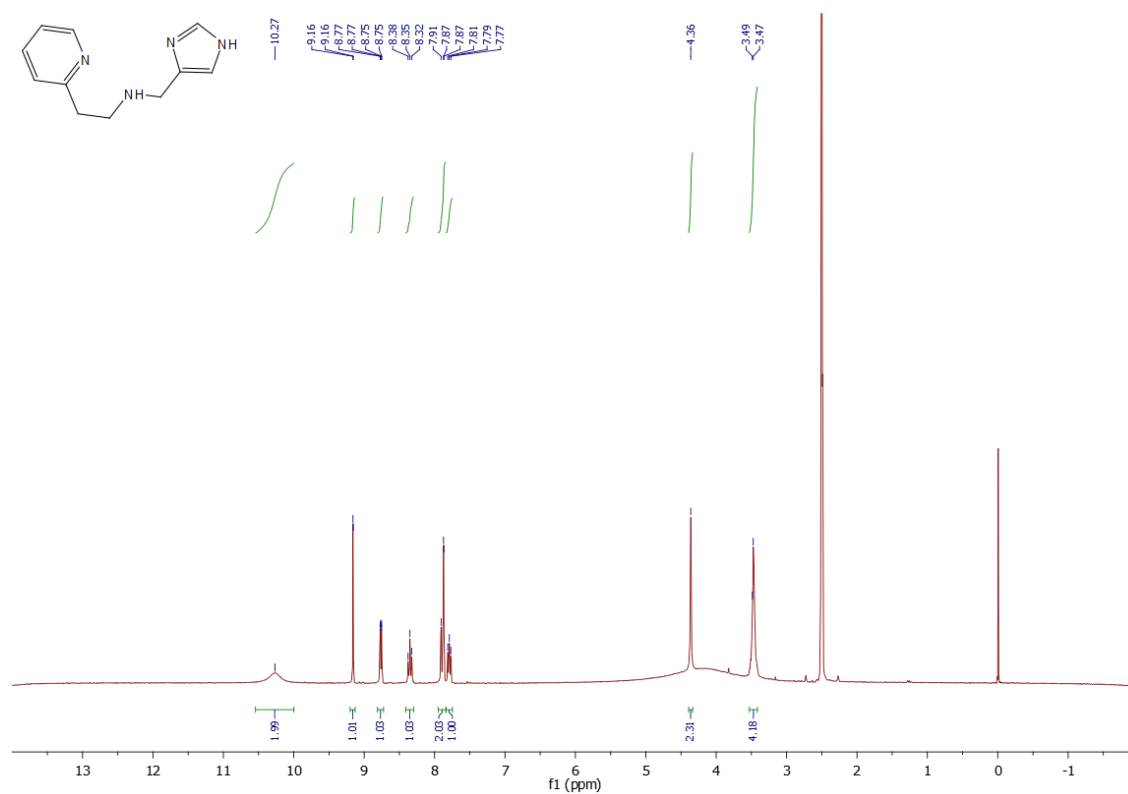

**Figure S72:** <sup>1</sup>H NMR spectrum of L6 in d<sub>6</sub>-DMSO at 25°C.

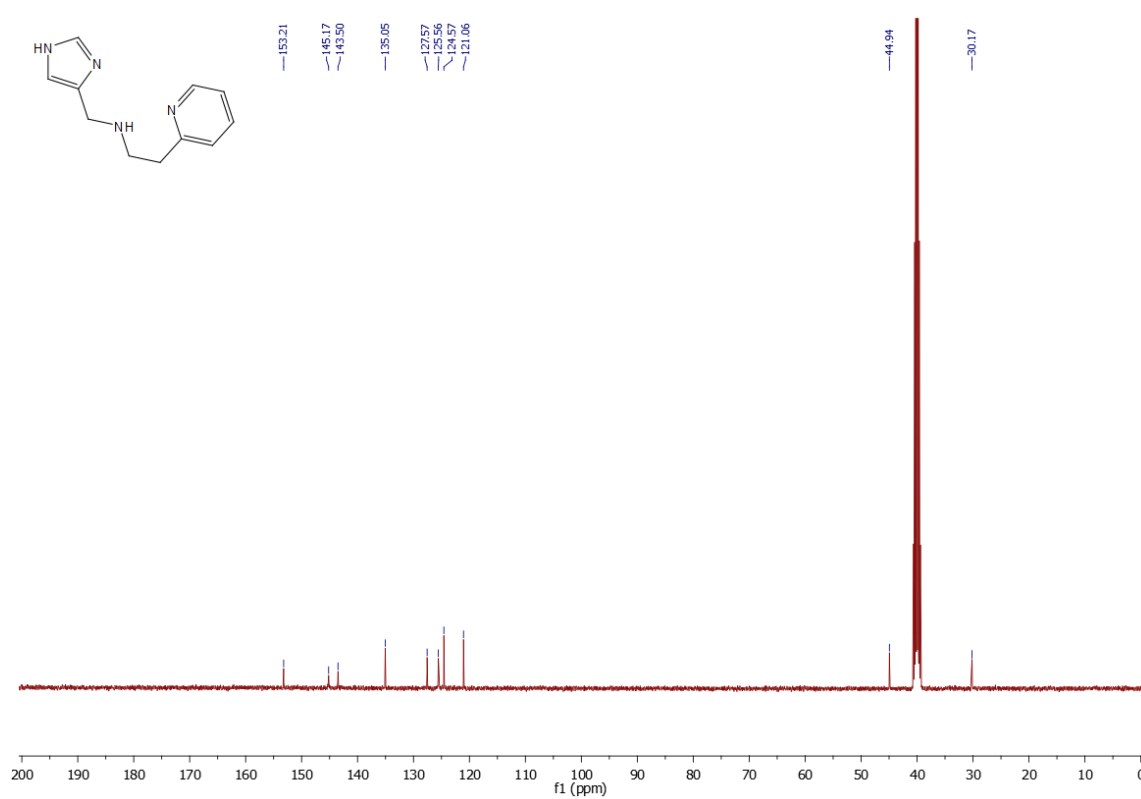

**Figure S73:** <sup>13</sup>C NMR spectrum of L6 in d<sub>6</sub>-DMSO at 25°C.

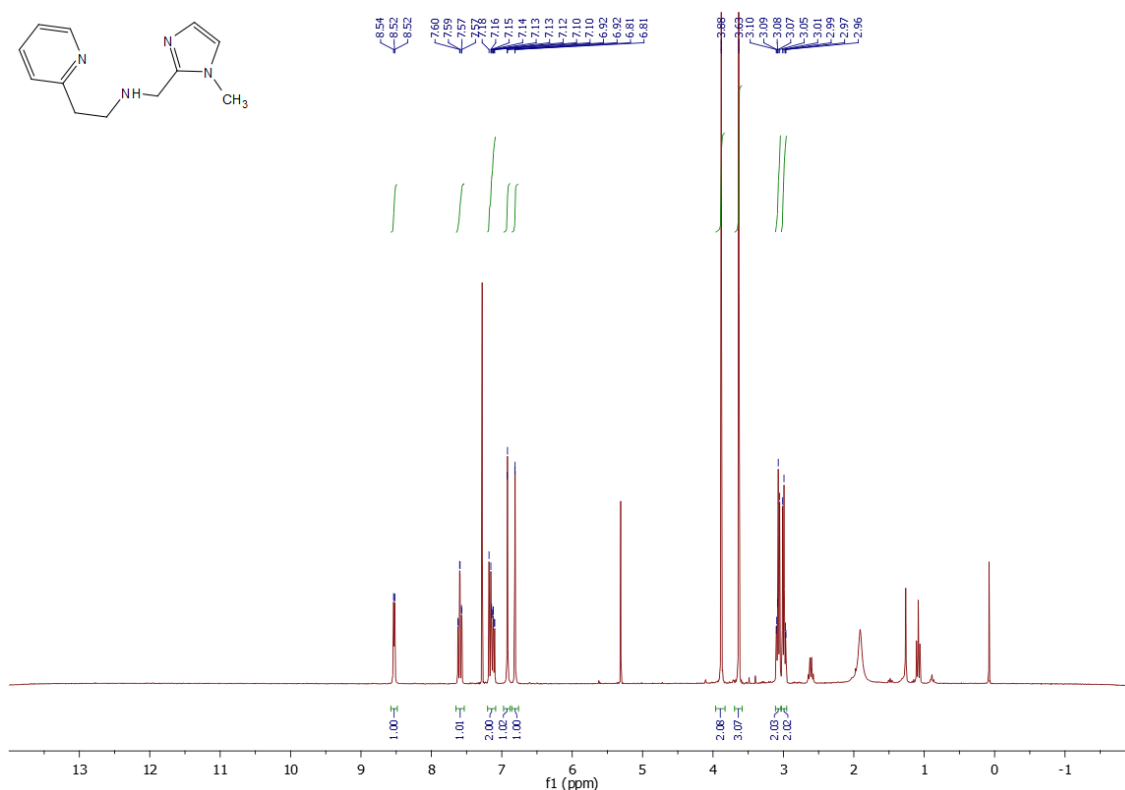

**Figure S74:**  $^1\text{H}$  NMR spectrum of **L7** in  $d_6$ -DMSO at  $25^\circ\text{C}$ .

## 10) References

- (1) Stoll, S.; Schweiger, A. EasySpin, a Comprehensive Software Package for Spectral Simulation and Analysis in EPR. *Journal of Magnetic Resonance* **2006**, *178* (1), 42–55. <https://doi.org/10.1016/j.jmr.2005.08.013>.
- (2) Durmus, S.; Garrison, J. C.; Panzner, M. J.; Tessier, C. A.; Youngs, W. J. Synthesis of an Imidazolium-Linked Cyclophane from Histamine. *Tetrahedron* **2005**, *61* (1), 97–101. <https://doi.org/10.1016/j.tet.2004.10.056>.
- (3) Saulnier, M. G.; Frennesson, D. B.; Wittman, M. D.; Zimmermann, K.; Velaparthi, U.; Langley, D. R.; Struzynski, C.; Sang, X.; Carboni, J.; Li, A.; Greer, A.; Yang, Z.; Balimane, P.; Gottardis, M.; Attar, R.; Vyas, D. 2-(1H-Imidazol-4-yl)Ethanamine and 2-(1H-Pyrazol-1-yl)Ethanamine Side Chain Variants of the IGF-1R Inhibitor BMS-536924. *Bioorg Med Chem Lett* **2008**, *18* (5), 1702–1707. <https://doi.org/10.1016/j.bmcl.2008.01.049>.
- (4) Ohkanda, J.; Lockman, J. W.; Kothare, M. A.; Qian, Y.; Blaskovich, M. A.; Sehti, S. M.; Hamilton, A. D. Design and Synthesis of Potent Nonpeptidic Farnesyltransferase

- Inhibitors Based on a Terphenyl Scaffold. *J Med Chem* **2002**, *45* (1), 177–188. <https://doi.org/10.1021/jm0103099>.
- (5) Casella, L.; Gullotti, M.; Pallanza, G.; Buga, M. *Spectroscopic and Binding Studies of Azide-Copper (II) Model Complexes*; 1991; Vol. 30.
- (6) Galli, U.; Hysenlika, R.; Meneghetti, F.; Grosso, E. Del; Pelliccia, S.; Novellino, E.; Giustiniano, M.; Tron, G. C. Exploiting the Nucleophilicity of the Nitrogen Atom of Imidazoles: One-Pot Three-Component Synthesis of Imidazo-Pyrazines. *Molecules* **2019**, *24* (10). <https://doi.org/10.3390/molecules24101959>.
- (7) Concia, A. L.; Beccia, M. R.; Orio, M.; Ferre, F. T.; Scarpellini, M.; Biaso, F.; Guigliarelli, B.; Réglie, M.; Simaan, A. J. Copper Complexes as Bioinspired Models for Lytic Polysaccharide Monooxygenases. *Inorg Chem* **2017**, *56* (3), 1023–1026. <https://doi.org/10.1021/acs.inorgchem.6b02165>.
- (8) Becke, A. D. Density-Functional Thermochemistry. III. The Role of Exact Exchange. *J Chem Phys* **1993**, *98* (7), 5648–5652. <https://doi.org/10.1063/1.464913>.
- (9) Stephens, P. J.; Devlin, F. J.; Chabalowski, C. F.; Frisch, M. J. *Ab Initio Calculation of Vibrational Absorption and Circular Dichroism Spectra Using Density Functional Force Fields*; 1994; Vol. 0.
- (10) Grimme, S.; Antony, J.; Ehrlich, S.; Krieg, H. A Consistent and Accurate Ab Initio Parametrization of Density Functional Dispersion Correction (DFT-D) for the 94 Elements H-Pu. *Journal of Chemical Physics* **2010**, *132* (15). <https://doi.org/10.1063/1.3382344>.
- (11) Hehre, W. J.; Lathan, W. A. Self-Consistent Molecular Orbital Methods. XIV. An Extended Gaussian-Type Basis for Molecular Orbital Studies of Organic Molecules. Inclusion of Second Row Elements. *J Chem Phys* **1972**, *56* (11), 5255–5257. <https://doi.org/10.1063/1.1677028>.
